# Supplementary material for: Sero-epidemiological investigation and cross-neutralization activity against SARS-CoV-2 variants in cats and dogs, Thailand
Source: Front Vet Sci. 2024 May 6;11:1329656. doi: 10.3389/fvets.2024.1329656 (PMC11103004; doi:10.3389/fvets.2024.1329656)
Supplement: Supplementary file 1 [file Table_1.xlsx]

## Sheet: Sheet1
Table S1 Demographic characteristics and neutralizing antibody titers to SARS-CoV-2 in cats and dogs
Animal ID	Species	Date of collection	Age (Y/M/D)	Sex	Breed	Location	Neutralizing antibody titers
							Wuhan-Hu-1	Delta (B.1.617.2)
1	Cat	2020-05-12	0 Y 8 M 20 D	Male	Thai	Bangkok	<10	<10
2	Cat	2020-05-12	0 Y 0 M 10 D	Female	Mixed Breed	Samut Sakhon	<10	<10
3	Dog	2020-05-12	10 Y 2 M 11 D	Male	Golden Retriever	Nonthaburi	<10	<10
4	Dog	2020-05-12	6 Y 2 M 11 D	Male	Shih Tzu	Samut Sakhon	<10	<10
5	Cat	2020-05-12	5 Y 3 M 11 D	Male	Thai	Bangkok	<10	<10
6	Dog	2020-05-12	0 Y 9 M 16 D	Male	Pomeranian	Samut Sakhon	<10	<10
7	Cat	2020-05-12	0 Y 2 M 4 D	Male	British Shorthair	Nonthaburi	<10	<10
8	Cat	2020-05-12	0 Y 6 M 11 D	Male	Thai	Nonthaburi	<10	<10
9	Cat	2020-05-12	0 Y 6 M 11 D	Male	Thai	Nonthaburi	<10	<10
10	Cat	2020-05-12	3 Y 0 M 11 D	Male	Mixed Breed	Bangkok	<10	<10
11	Cat	2020-05-12	7 Y 8 M 11 D	Male	Maine Coon	Nonthaburi	<10	<10
12	Dog	2020-05-12	12 Y 1 M 11 D	Female	Golden Retriever	Bangkok	<10	<10
13	Cat	2020-05-12	1 Y 1 M 24 D	Male	Thai	Bangkok	<10	<10
14	Dog	2020-05-12	13 Y 0 M 29 D	Male	Siberian Husky	Pathum Thani	<10	<10
15	Dog	2020-05-12	10 Y 0 M 11 D	Male	Mixed Breed	Bangkok	<10	<10
16	Dog	2020-05-12	9 Y 0 M 11 D	Male	Thai	Bangkok	<10	<10
17	Cat	2020-05-12	5 Y 10 M 11 D	Female	N/A	Bangkok	<10	<10
18	Cat	2020-05-12	8 Y 9 M 11 D	Male	Thai	Bangkok	<10	<10
19	Dog	2020-05-12	11 Y 11 M 11 D	Male	Golden Retriever	Nakhon Pathom	<10	<10
20	Cat	2020-05-12	1 Y 0 M 11 D	Female	Thai	Bangkok	<10	<10
21	Cat	2020-05-12	1 Y 2 M 11 D	Male	Thai	Bangkok	<10	<10
22	Dog	2020-05-12	N/A	Female	N/A	Nonthaburi	<10	<10
23	Cat	2020-05-15	12 Y 10 M 14 D	Female	Siamese	Bangkok	<10	<10
24	Cat	2020-05-15	2 Y 9 M 16 D	Male	Maine Coon	Bangkok	<10	<10
25	Cat	2020-05-15	1 Y 7 M 14 D	Male	Thai	Nakhon Pathom	<10	<10
26	Cat	2020-05-15	3 Y 10 M 14 D	Male	Persian	Bangkok	<10	<10
27	Cat	2020-05-15	0 Y 2 M 14 D	Female	Thai	Nakhon Pathom	<10	<10
28	Cat	2020-05-15	8 Y 9 M 14 D	Male	Thai	Bangkok	<10	<10
29	Cat	2020-05-15	5 Y 5 M 14 D	Male	Thai	Samut Sakhon	<10	<10
30	Dog	2020-05-15	2 Y 7 M 26 D	Male	Shih Tzu	Phra Nakhon Si Ayutthaya	<10	<10
31	Dog	2020-05-15	0 Y 10 M 8 D	Male	Labrador Retriever	Nonthaburi	<10	<10
32	Dog	2020-05-15	12 Y 4 M 14 D	Male	Miniature Pinscher	Nakhon Pathom	<10	<10
33	Dog	2020-05-15	12 Y 5 M 14 D	Female	Yorkshire Terrier	Nonthaburi	<10	<10
34	Dog	2020-05-15	14 Y 7 M 17 D	Female	Shih Tzu	Nonthaburi	<10	<10
35	Dog	2020-05-15	7 Y 5 M 14 D	Female	Shih Tzu Mix	Bangkok	<10	<10
36	Dog	2020-05-15	16 Y 9 M 14 D	Female	Mixed Breed	Nakhon Pathom	<10	<10
37	Dog	2020-05-15	15 Y 4 M 14 D	Male	Thai	Bangkok	<10	<10
38	Dog	2020-05-15	0 Y 3 M 14 D	Female	Thai	Bangkok	<10	<10
39	Dog	2020-05-15	10 Y 4 M 14 D	Male	Shih Tzu	Nakhon Pathom	<10	<10
40	Dog	2020-05-18	8 Y 0 M 17 D	Female	Thai	Phra Nakhon Si Ayutthaya	<10	<10
41	Dog	2020-05-18	11 Y 0 M 17 D	Female	Thai	Bangkok	<10	<10
42	Dog	2020-05-18	8 Y 10 M 17 D	Female	Golden Retriever Mix	Nakhon Pathom	<10	<10
43	Dog	2020-05-18	10 Y 5 M 4 D	Female	Thai	Nonthaburi	<10	<10
44	Dog	2020-05-18	12 Y 0 M 17 D	Female	Thai	Nakhon Pathom	<10	<10
45	Dog	2020-05-18	10 Y 11 M 4 D	Female	Poodle	Bangkok	<10	<10
46	Cat	2020-05-18	0 Y 6 M 17 D	Male	Thai	Nonthaburi	<10	<10
47	Cat	2020-05-18	7 Y 1 M 17 D	Female	Thai	Nakhon Pathom	<10	<10
48	Cat	2020-05-20	10 Y 0 M 19 D	Female	Thai	Bangkok	<10	<10
49	Cat	2020-05-20	0 Y 2 M 5 D	Female	Thai	Nonthaburi	<10	<10
50	Cat	2020-05-20	0 Y 4 M 21 D	Male	Black bombay	Nonthaburi	<10	<10
51	Cat	2020-05-20	16 Y 3 M 19 D	Female	Siamese	Bangkok	<10	<10
52	Cat	2020-05-20	1 Y 7 M 19 D	Male	Thai	Nakhon Pathom	<10	<10
53	Dog	2020-05-20	0 Y 1 M 19 D	Male	Thai	Nonthaburi	<10	<10
54	Dog	2020-05-20	2 Y 2 M 19 D	Male	German Shepherd	Phra Nakhon Si Ayutthaya	<10	<10
55	Dog	2020-05-20	9 Y 6 M 19 D	Female	American Pit Bull Terrier	Bangkok	<10	<10
56	Dog	2020-05-20	12 Y 1 M 19 D	Male	Shih Tzu	Nonthaburi	<10	<10
57	Cat	2020-05-22	1 Y 0 M 21 D	Male	Thai	Bangkok	<10	<10
58	Cat	2020-05-22	15 Y 6 M 21 D	Female	Domestic Shorthair (DSH)	Bangkok	<10	<10
59	Cat	2020-05-22	0 Y 6 M 21 D	Male	Thai	Nakhon Pathom	<10	<10
60	Cat	2020-05-22	0 Y 8 M 21 D	Male	Siamese	Nonthaburi	<10	<10
61	Cat	2020-05-22	0 Y 5 M 11 D	Male	Sphynx	Nonthaburi	<10	<10
62	Cat	2020-05-22	2 Y 3 M 17 D	Male	Thai	Nakhon Pathom	<10	<10
63	Cat	2020-05-22	0 Y 3 M 8 D	Female	Thai	Bangkok	<10	<10
64	Cat	2020-05-22	9 Y 8 M 21 D	Female	Siamese	Bangkok	<10	<10
65	Cat	2020-05-22	5 Y 0 M 21 D	Female	Thai	Samut Sakhon	<10	<10
66	Cat	2020-05-22	2 Y 3 M 21 D	Female	Thai	Samut Sakhon	<10	<10
67	Dog	2020-05-22	6 Y 2 M 21 D	Male	Shih Tzu	Samut Sakhon	<10	<10
68	Dog	2020-05-22	8 Y 5 M 21 D	Male	Golden Retriever	Bangkok	<10	<10
69	Dog	2020-05-22	6 Y 8 M 21 D	Male	Saint Bernard	Nonthaburi	<10	<10
70	Dog	2020-05-22	10 Y 2 M 21 D	Male	Golden Retriever	Nonthaburi	<10	<10
71	Dog	2020-05-22	2 Y 0 M 21 D	Male	Thai	Bangkok	<10	<10
72	Dog	2020-05-22	14 Y 0 M 21 D	Female	Thai	Samut Sakhon	<10	<10
73	Dog	2020-05-22	4 Y 1 M 21 D	Female	Chihuahua	Nonthaburi	<10	<10
74	Dog	2020-05-22	0 Y 4 M 21 D	Female	Thai	Bangkok	<10	<10
75	Dog	2020-05-22	1 Y 0 M 21 D	Female	American Pit Bull Terrier	Bangkok	<10	<10
76	Dog	2020-05-22	17 Y 0 M 11 D	Female	Mixed Breed	Samut Sakhon	<10	<10
77	Cat	2020-05-25	0 Y 2 M 24 D	Female	Thai	Nakhon Pathom	<10	<10
78	Cat	2020-05-25	0 Y 0 M 7 D	Female	Thai	Nakhon Pathom	<10	<10
79	Cat	2020-05-25	1 Y 0 M 5 D	Female	Thai	Bangkok	<10	<10
80	Cat	2020-05-25	0 Y 8 M 24 D	Male	Thai	Samut Sakhon	<10	<10
81	Cat	2020-05-25	0 Y 5 M 24 D	Female	Persian	Bangkok	<10	<10
82	Cat	2020-05-25	2 Y 3 M 21 D	Male	Persian Mix	Nakhon Pathom	<10	<10
83	Cat	2020-05-25	15 Y 6 M 24 D	Female	Persian	Nakhon Pathom	<10	<10
84	Cat	2020-05-25	3 Y 7 M 4 D	Male	Thai	Bangkok	<10	<10
85	Dog	2020-05-25	9 Y 2 M 15 D	Female	Rottweiler	Samut Sakhon	<10	<10
86	Dog	2020-05-25	0 Y 2 M 16 D	Female	Labrador Retriever	Nakhon Pathom	<10	<10
87	Dog	2020-05-25	0 Y 3 M 24 D	Male	Mixed Breed	Nonthaburi	<10	<10
88	Dog	2020-05-25	9 Y 0 M 17 D	Male	Pug	Bangkok	<10	<10
89	Dog	2020-05-25	12 Y 0 M 7 D	Male	Mixed Breed	Bangkok	<10	<10
90	Dog	2020-05-25	12 Y 0 M 7 D	Male	Mixed Breed	Bangkok	<10	<10
91	Dog	2020-05-25	4 Y 5 M 25 D	Male	Beagle	Bangkok	<10	<10
92	Cat	2020-05-27	0 Y 7 M 26 D	Male	Mixed Breed	Nonthaburi	<10	<10
93	Cat	2020-05-27	0 Y 7 M 26 D	Male	Mixed Breed	Nonthaburi	<10	<10
94	Cat	2020-05-27	6 Y 1 M 26 D	Male	Maine Coon	Nakhon Pathom	<10	<10
95	Cat	2020-05-27	7 Y 0 M 26 D	Male	Thai	Nakhon Pathom	<10	<10
96	Cat	2020-05-27	4 Y 3 M 5 D	Male	Siamese	Bangkok	<10	<10
97	Dog	2020-05-27	11 Y 0 M 0 D	Female	Thai	Nonthaburi	<10	<10
98	Dog	2020-05-27	10 Y 0 M 26 D	Female	Poodle	Bangkok	<10	<10
99	Dog	2020-05-27	8 Y 6 M 5 D	Female	Spitz	Bangkok	<10	<10
100	Dog	2020-05-27	11 Y 9 M 26 D	Female	Labrador Retriever	Nonthaburi	<10	<10
101	Dog	2020-05-27	10 Y 0 M 6 D	Female	Golden Retriever	Bangkok	<10	<10
102	Dog	2020-05-27	3 Y 0 M 26 D	Male	Mixed Breed	Bangkok	<10	<10
103	Dog	2020-05-27	1 Y 5 M 7 D	Male	Thai Mix	Bangkok	<10	<10
104	Dog	2020-05-27	8 Y 0 M 26 D	Female	Thai	Phra Nakhon Si Ayutthaya	<10	<10
105	Dog	2020-05-27	14 Y 0 M 26 D	Male	Thai	Bangkok	<10	<10
106	Dog	2020-05-27	11 Y 0 M 26 D	Female	Thai	Bangkok	<10	<10
107	Dog	2020-05-27	0 Y 3 M 26 D	Male	Mixed Breed	Nonthaburi	<10	<10
108	Dog	2020-05-27	11 Y 8 M 26 D	Female	Beagle	Nakhon Pathom	<10	<10
109	Dog	2020-05-27	14 Y 0 M 26 D	Female	Shih Tzu	Bangkok	<10	<10
110	Cat	2020-05-29	2 Y 0 M 28 D	Male	Persian	Bangkok	<10	<10
111	Cat	2020-05-29	8 Y 8 M 6 D	Male	Siberian Husky	Bangkok	<10	<10
112	Cat	2020-05-29	0 Y 10 M 28 D	Male	Siamese	Bangkok	<10	<10
113	Cat	2020-05-29	4 Y 10 M 28 D	Female	Persian Mix	Bangkok	<10	<10
114	Cat	2020-05-29	2 Y 11 M 28 D	Female	Siamese	Bangkok	<10	<10
115	Cat	2020-05-29	4 Y 0 M 28 D	Male	Thai	Bangkok	<10	<10
116	Cat	2020-05-29	3 Y 10 M 3 D	Male	Persian Mix	Bangkok	<10	<10
117	Dog	2020-05-29	13 Y 2 M 28 D	Female	Mixed Breed	Nakhon Pathom	<10	<10
118	Dog	2020-05-29	12 Y 1 M 28 D	Male	German Shepherd	Nakhon Pathom	<10	<10
119	Dog	2020-05-29	10 Y 0 M 28 D	Female	Poodle	Samut Prakan	<10	<10
120	Dog	2020-05-29	2 Y 2 M 28 D	Male	German Shepherd	Phra Nakhon Si Ayutthaya	<10	<10
121	Dog	2020-05-29	0 Y 1 M 10 D	Female	Thai	Nonthaburi	<10	<10
122	Dog	2020-05-29	15 Y 1 M 10 D	Male	Thai	Samut Prakan	<10	<10
123	Dog	2020-05-29	4 Y 0 M 28 D	Male	Shih Tzu	Samut Sakhon	<10	<10
124	Dog	2020-05-29	9 Y 2 M 28 D	Female	Thai Mix	Nonthaburi	<10	<10
125	Dog	2020-05-29	0 Y 4 M 28 D	Female	Thai Ridgeback	Nonthaburi	<10	<10
126	Dog	2020-05-29	3 Y 3 M 28 D	Male	Siberian Husky	Bangkok	<10	<10
127	Dog	2020-05-29	14 Y 2 M 28 D	Female	Mixed Breed	Nakhon Pathom	<10	<10
128	Dog	2020-05-29	2 Y 7 M 24 D	Male	Thai Bangkaew	Ratchaburi	<10	<10
129	Dog	2020-05-29	2 Y 2 M 28 D	Female	German Shepherd	Phra Nakhon Si Ayutthaya	<10	<10
130	Cat	2020-06-04	1 Y 2 M 17 D	Male	Thai	Bangkok	<10	<10
131	Cat	2020-06-04	0 Y 3 M 3 D	Male	Thai	Bangkok	<10	<10
132	Cat	2020-06-04	16 Y 4 M 3 D	Female	Siamese	Bangkok	<10	<10
133	Cat	2020-06-04	1 Y 7 M 3 D	Male	Thai	Samut Sakhon	<10	<10
134	Cat	2020-06-04	19 Y 1 M 3 D	Male	Siamese	Bangkok	<10	<10
135	Cat	2020-06-04	0 Y 1 M 3 D	Female	Persian	Nakhon Pathom	<10	<10
136	Cat	2020-06-04	1 Y 0 M 3 D	Male	Mixed Breed	Bangkok	<10	<10
137	Cat	2020-06-04	5 Y 3 M 3 D	Male	Thai	Bangkok	<10	<10
138	Cat	2020-06-04	1 Y 0 M 3 D	Male	Mixed Breed	Bangkok	<10	<10
139	Cat	2020-06-04	4 Y 8 M 27 D	Female	American Shorthair Mix	Bangkok	<10	<10
140	Cat	2020-06-04	0 Y 0 M 3 D	Female	N/A	Nakhon Pathom	<10	<10
141	Cat	2020-06-04	2 Y 6 M 3 D	Male	Siamese	Nakhon Pathom	<10	<10
142	Cat	2020-06-04	1 Y 7 M 3 D	Male	Thai	Samut Sakhon	<10	<10
143	Cat	2020-06-04	1 Y 1 M 3 D	Male	Thai	Bangkok	<10	<10
144	Cat	2020-06-04	2 Y 2 M 12 D	Female	Scottish Fold	Bangkok	<10	<10
145	Dog	2020-06-04	10 Y 11 M 11 D	Female	Spitz	Bangkok	<10	<10
146	Dog	2020-06-04	15 Y 0 M 11 D	Male	Thai Ridgeback Mix	Bangkok	<10	<10
147	Dog	2020-06-04	3 Y 3 M 1 D	Male	Thai	Nakhon Pathom	<10	<10
148	Dog	2020-06-04	1 Y 3 M 3 D	Female	Siberian Husky	Bangkok	<10	<10
149	Dog	2020-06-04	6 Y 8 M 10 D	Male	Siberian Husky	Bangkok	<10	<10
150	Cat	2020-06-12	2 Y 0 M 11 D	Male	Thai	Bangkok	<10	<10
151	Cat	2020-06-12	11 Y 7 M 24 D	Female	Thai	Bangkok	<10	<10
152	Cat	2020-06-12	15 Y 1 M 11 D	Female	Thai	Bangkok	<10	<10
153	Cat	2020-06-12	3 Y 0 M 11 D	Male	Thai	Nakhon Pathom	<10	<10
154	Cat	2020-06-12	3 Y 0 M 11 D	Male	Thai	Nakhon Pathom	<10	<10
155	Cat	2020-06-12	3 Y 0 M 11 D	Male	Thai	Nakhon Pathom	<10	<10
156	Cat	2020-06-12	4 Y 0 M 11 D	Female	Mixed Breed	Bangkok	<10	<10
157	Cat	2020-06-12	17 Y 10 M 11 D	Female	Persian	Bangkok	<10	<10
158	Cat	2020-06-12	0 Y 8 M 11 D	Male	Thai	Nonthaburi	<10	<10
159	Cat	2020-06-12	0 Y 3 M 11 D	Male	Thai	Samut Sakhon	<10	<10
160	Cat	2020-06-12	0 Y 0 M 6 D	Female	Thai	Nakhon Pathom	<10	<10
161	Cat	2020-06-12	3 Y 0 M 11 D	Male	Thai	Nakhon Pathom	<10	<10
162	Cat	2020-06-12	1 Y 0 M 11 D	Male	Persian	Bangkok	<10	<10
163	Cat	2020-06-12	20 Y 7 M 7 D	Male	Mixed Breed	Bangkok	<10	<10
164	Cat	2020-06-12	3 Y 0 M 7 D	Female	Thai	Samut Sakhon	<10	<10
165	Cat	2020-06-12	1 Y 3 M 11 D	Female	Thai	Bangkok	<10	<10
166	Cat	2020-06-12	7 Y 10 M 11 D	Female	Thai	Bangkok	<10	<10
167	Cat	2020-06-12	12 Y 3 M 11 D	Female	Persian Mix	Nonthaburi	<10	<10
168	Cat	2020-06-12	0 Y 11 M 16 D	Female	Mixed Breed	Nakhon Pathom	<10	<10
169	Dog	2020-06-19	0 Y 3 M 10 D	Male	German Shepherd	Samut Sakhon	<10	<10
170	Dog	2020-06-19	0 Y 4 M 5 D	Male	Jack Russell Terrier	Bangkok	<10	<10
171	Cat	2020-06-19	3 Y 9 M 0 D	Male	Thai	Bangkok	<10	<10
172	Dog	2020-06-19	13 Y 6 M 18 D	Male	Mixed Breed	Nonthaburi	<10	<10
173	Dog	2020-06-19	8 Y 10 M 7 D	Female	Thai	Nakhon Pathom	<10	<10
174	Dog	2020-06-19	12 Y 5 M 30 D	Female	Thai Bangkaew	Bangkok	<10	<10
175	Dog	2020-06-19	8 Y 6 M 6 D	Female	Thai Bangkaew	Nonthaburi	<10	<10
176	Dog	2020-06-19	0 Y 4 M 18 D	Male	Mixed Breed	Nakhon Pathom	<10	<10
177	Dog	2020-06-19	8 Y 1 M 18 D	Male	Shih Tzu	Ratchaburi	<10	<10
178	Dog	2020-06-19	12 Y 4 M 18 D	Female	Thai	Nakhon Pathom	<10	<10
179	Dog	2020-06-19	16 Y 0 M 18 D	Female	Thai	Bangkok	<10	<10
180	Dog	2020-06-19	14 Y 4 M 18 D	Female	Pomeranian	Nonthaburi	<10	<10
181	Dog	2020-06-19	12 Y 1 M 18 D	Female	Shih Tzu	Pathum Thani	<10	<10
182	Dog	2020-06-19	13 Y 5 M 18 D	Male	Thai Bangkaew	Nakhon Pathom	<10	<10
183	Dog	2020-06-19	10 Y 3 M 18 D	Male	Golden Retriever	Nonthaburi	<10	<10
184	Dog	2020-06-19	11 Y 11 M 24 D	Male	Poodle	Bangkok	<10	<10
185	Dog	2020-06-19	8 Y 0 M 18 D	Male	Poodle	Nakhon Pathom	<10	<10
186	Dog	2020-06-19	12 Y 4 M 18 D	Male	Mixed Breed	Bangkok	<10	<10
187	Dog	2020-06-19	10 Y 4 M 23 D	Female	Mixed Breed	Nakhon Pathom	<10	<10
188	Dog	2020-06-19	10 Y 0 M 20 D	Female	Thai	Bangkok	<10	<10
189	Dog	2020-06-19	6 Y 6 M 18 D	Male	Mixed Breed	Nonthaburi	<10	<10
190	Dog	2020-06-19	10 Y 2 M 18 D	Male	Thai	Bangkok	<10	<10
191	Dog	2020-06-19	9 Y 10 M 7 D	Male	Beagle	Nonthaburi	<10	<10
192	Dog	2020-06-19	9 Y 1 M 11 D	Male	Pug	Bangkok	<10	<10
193	Dog	2020-06-19	4 Y 1 M 4 D	Male	Mixed Breed	Samut Sakhon	<10	<10
194	Dog	2020-06-19	0 Y 5 M 10 D	Male	Thai	Bangkok	<10	<10
195	Dog	2020-06-19	5 Y 1 M 18 D	Female	Chihuahua	Nakhon Pathom	<10	<10
196	Dog	2020-06-19	15 Y 1 M 18 D	Male	Mixed Breed	Nakhon Pathom	<10	<10
197	Dog	2020-06-19	10 Y 1 M 18 D	Female	Siberian Husky	Nonthaburi	<10	<10
198	Dog	2020-06-19	9 Y 0 M 18 D	Male	Poodle	Samut Prakan	<10	<10
199	Dog	2020-06-19	12 Y 7 M 18 D	Male	Chow Chow	Bangkok	<10	<10
200	Dog	2020-06-19	10 Y 0 M 18 D	Female	Mixed Breed	Bangkok	<10	<10
201	Dog	2020-06-19	8 Y 2 M 18 D	Female	Beagle	Nonthaburi	<10	<10
202	Dog	2020-06-19	11 Y 6 M 18 D	Female	Golden Retriever	Nonthaburi	<10	<10
203	Dog	2020-06-19	10 Y 9 M 18 D	Female	Poodle	Nonthaburi	<10	<10
204	Dog	2020-06-19	10 Y 0 M 18 D	Female	Chihuahua	Bangkok	<10	<10
205	Dog	2020-06-19	12 Y 0 M 18 D	Female	Chihuahua	Nonthaburi	<10	<10
206	Dog	2020-06-19	8 Y 11 M 18 D	Female	Golden Retriever Mix	Nakhon Pathom	<10	<10
207	Dog	2020-06-19	5 Y 8 M 9 D	Female	Beagle	Bangkok	<10	<10
208	Dog	2020-06-19	14 Y 2 M 18 D	Male	Chihuahua	Bangkok	<10	<10
209	Dog	2020-06-19	N/A	Male	Thai	Bangkok	<10	<10
210	Dog	2020-06-19	8 Y 0 M 18 D	Male	Beagle	Nakhon Pathom	<10	<10
211	Dog	2020-06-19	12 Y 4 M 12 D	Female	Mixed Breed	Bangkok	<10	<10
212	Dog	2020-06-19	0 Y 5 M 10 D	Male	Thai	Bangkok	<10	<10
213	Dog	2020-06-19	8 Y 0 M 18 D	Male	Poodle	Nakhon Pathom	<10	<10
214	Dog	2020-06-19	11 Y 0 M 18 D	Male	Shih Tzu	Bangkok	<10	<10
215	Cat	2020-06-19	0 Y 0 M 18 D	Female	Thai	Bangkok	<10	<10
216	Cat	2020-06-19	8 Y 0 M 23 D	Male	Thai	Bangkok	<10	<10
217	Cat	2020-06-19	0 Y 0 M 10 D	Female	Thai	Nakhon Pathom	<10	<10
218	Cat	2020-06-19	0 Y 3 M 15 D	Male	Thai	Bangkok	<10	<10
219	Cat	2020-06-19	3 Y 0 M 14 D	Female	Thai	Samut Sakhon	<10	<10
220	Cat	2020-06-19	0 Y 8 M 3 D	Male	Scottish Fold	Nakhon Pathom	<10	<10
221	Cat	2020-06-19	2 Y 0 M 18 D	Male	Siamese	Samut Sakhon	<10	<10
222	Cat	2020-06-19	0 Y 9 M 24 D	Male	Persian Mix	Nakhon Pathom	<10	<10
223	Cat	2020-06-19	2 Y 10 M 2 D	Male	Siamese	Bangkok	<10	<10
224	Cat	2020-06-19	2 Y 0 M 18 D	Male	Mixed Breed	Bangkok	<10	<10
225	Cat	2020-06-19	2 Y 7 M 18 D	Male	American Shorthair	Bangkok	<10	<10
226	Cat	2020-06-19	7 Y 2 M 18 D	Female	Thai	Nakhon Pathom	<10	<10
227	Cat	2020-06-19	0 Y 7 M 18 D	Male	Munchkin	Bangkok	<10	<10
228	Cat	2020-06-19	0 Y 7 M 14 D	Male	Thai	Bangkok	<10	<10
229	Cat	2020-06-19	5 Y 4 M 18 D	Male	Thai	Bangkok	<10	<10
230	Cat	2020-06-19	5 Y 0 M 18 D	Male	Thai	Nakhon Pathom	<10	<10
231	Cat	2020-06-19	7 Y 0 M 18 D	Female	Thai	Bangkok	<10	<10
232	Cat	2020-06-19	0 Y 3 M 18 D	Female	Thai	Nakhon Pathom	<10	<10
233	Cat	2020-06-19	9 Y 9 M 18 D	Female	Siamese	Bangkok	<10	<10
234	Cat	2020-06-19	9 Y 9 M 18 D	Female	Siamese	Bangkok	<10	<10
235	Cat	2020-06-19	3 Y 10 M 18 D	Male	Thai	Nakhon Pathom	<10	<10
236	Cat	2020-06-19	0 Y 7 M 13 D	Female	Scottish Fold	Bangkok	<10	<10
237	Cat	2020-06-19	0 Y 3 M 21 D	Female	Exotic Shorthair	Bangkok	<10	<10
238	Cat	2020-06-19	3 Y 0 M 14 D	Female	Thai	Samut Sakhon	<10	<10
239	Cat	2020-06-19	0 Y 8 M 18 D	Male	Thai	Nakhon Pathom	<10	<10
240	Cat	2020-06-19	13 Y 2 M 18 D	Female	Thai	Bangkok	<10	<10
241	Cat	2020-06-19	2 Y 0 M 18 D	Female	Mixed Breed	Bangkok	<10	<10
242	Cat	2020-06-19	15 Y 1 M 18 D	Female	Thai	Bangkok	<10	<10
243	Cat	2020-06-19	6 Y 0 M 18 D	Female	Thai	Nonthaburi	<10	<10
244	Cat	2020-06-19	2 Y 0 M 18 D	Male	Mixed Breed	Bangkok	<10	<10
245	Cat	2020-06-19	8 Y 0 M 18 D	Male	Siamese	Bangkok	<10	<10
246	Cat	2020-06-19	1 Y 3 M 1 D	Male	Thai	Bangkok	<10	<10
247	Cat	2020-06-19	1 Y 0 M 28 D	Female	Mixed Breed	Nonthaburi	<10	<10
248	Cat	2020-06-19	3 Y 10 M 18 D	Male	Thai	Nakhon Pathom	<10	<10
249	Cat	2020-06-19	3 Y 0 M 11 D	Male	Scottish Fold	Nakhon Pathom	<10	<10
250	Cat	2020-06-19	9 Y 9 M 18 D	Female	Siamese	Bangkok	<10	<10
251	Cat	2020-06-19	2 Y 2 M 18 D	Male	Thai	Bangkok	<10	<10
252	Cat	2020-06-19	20 Y 7 M 14 D	Male	Mixed Breed	Bangkok	<10	<10
253	Cat	2020-06-19	2 Y 1 M 18 D	Male	Persian	Bangkok	<10	<10
254	Cat	2020-06-19	3 Y 10 M 18 D	Male	Thai	Nakhon Pathom	<10	<10
255	Cat	2020-06-19	1 Y 5 M 18 D	Female	American Shorthair Mix	Nakhon Pathom	<10	<10
256	Cat	2020-06-19	1 Y 1 M 7 D	Female	Persian	Samut Sakhon	<10	<10
257	Cat	2020-06-19	7 Y 10 M 18 D	Male	Siamese	Samut Sakhon	<10	<10
258	Dog	2020-06-26	12 Y 9 M 25 D	Male	Thai	Bangkok	<10	<10
259	Dog	2020-06-26	0 Y 10 M 25 D	Female	Mixed Breed	Nakhon Pathom	<10	<10
260	Dog	2020-06-26	13 Y 4 M 25 D	Male	Poodle Mix	Bangkok	<10	<10
261	Dog	2020-06-26	12 Y 6 M 25 D	Female	Golden Retriever	Bangkok	<10	<10
262	Dog	2020-06-26	15 Y 0 M 25 D	Male	Thai Bangkaew Mix	Nonthaburi	<10	<10
263	Dog	2020-06-26	13 Y 0 M 25 D	Male	Thai	Bangkok	<10	<10
264	Dog	2020-06-26	6 Y 9 M 25 D	Male	Thai	Nakhon Pathom	<10	<10
265	Dog	2020-06-26	13 Y 9 M 25 D	Female	Thai	Nakhon Pathom	<10	<10
266	Dog	2020-06-26	8 Y 10 M 25 D	Male	Siberian Husky	Nonthaburi	<10	<10
267	Dog	2020-06-26	10 Y 7 M 25 D	Female	Thai	Nonthaburi	<10	<10
268	Dog	2020-06-26	1 Y 5 M 22 D	Female	Siberian Husky	Nonthaburi	<10	<10
269	Dog	2020-06-26	8 Y 0 M 25 D	Male	German Shepherd	Nakhon Pathom	<10	<10
270	Dog	2020-06-26	1 Y 8 M 9 D	Female	Mixed Breed	Bangkok	<10	<10
271	Dog	2020-06-26	1 Y 5 M 22 D	Female	Siberian Husky	Nonthaburi	<10	<10
272	Dog	2020-06-26	15 Y 0 M 25 D	Female	Mixed Breed	Bangkok	<10	<10
273	Dog	2020-06-26	5 Y 4 M 25 D	Male	Golden Retriever	Nonthaburi	<10	<10
274	Dog	2020-06-26	13 Y 2 M 25 D	Male	Pomeranian	Samut Sakhon	<10	<10
275	Dog	2020-06-26	10 Y 7 M 25 D	Female	Thai	Nonthaburi	<10	<10
276	Dog	2020-06-26	6 Y 0 M 25 D	Female	Poodle	Bangkok	<10	<10
277	Dog	2020-06-26	15 Y 0 M 25 D	Male	Mixed Breed	Bangkok	<10	<10
278	Dog	2020-06-26	10 Y 0 M 25 D	Female	Chihuahua	Bangkok	<10	<10
279	Dog	2020-06-26	6 Y 0 M 25 D	Male	Thai	Bangkok	<10	<10
280	Cat	2020-06-26	2 Y 0 M 25 D	Male	Thai	Samut Sakhon	<10	<10
281	Cat	2020-06-26	3 Y 11 M 25 D	Male	Siamese	Nakhon Pathom	<10	<10
282	Dog	2020-06-26	15 Y 5 M 25 D	Male	American Cocker Spaniel	Bangkok	<10	<10
283	Dog	2020-06-26	10 Y 0 M 25 D	Female	Golden Retriever	Bangkok	<10	<10
284	Dog	2020-06-26	8 Y 0 M 25 D	Male	German Shepherd	Nakhon Pathom	<10	<10
285	Dog	2020-06-26	6 Y 6 M 1 D	Male	Pomeranian Mix	Bangkok	<10	<10
286	Cat	2020-06-26	0 Y 3 M 4 D	Female	Siamese	Bangkok	<10	<10
287	Dog	2020-06-26	7 Y 8 M 5 D	Male	Siberian Husky	Nonthaburi	<10	<10
288	Dog	2020-06-26	4 Y 0 M 24 D	Female	Thai	Bangkok	<10	<10
289	Dog	2020-06-26	0 Y 3 M 22 D	Male	American Bully	Nonthaburi	<10	<10
290	Dog	2020-06-26	11 Y 7 M 25 D	Male	Basset Hound	Bangkok	<10	<10
291	Dog	2020-06-26	16 Y 6 M 25 D	Female	Mixed Breed	Bangkok	<10	<10
292	Dog	2020-06-26	11 Y 1 M 25 D	Female	Thai	Bangkok	<10	<10
293	Dog	2020-06-26	5 Y 7 M 25 D	Female	Thai	Nonthaburi	<10	<10
294	Dog	2020-06-26	6 Y 8 M 19 D	Female	Mixed Breed	Bangkok	<10	<10
295	Dog	2020-06-26	10 Y 0 M 25 D	Female	Thai	Bangkok	<10	<10
296	Dog	2020-06-26	10 Y 5 M 25 D	Female	Shih Tzu	Bangkok	<10	<10
297	Dog	2020-06-26	2 Y 8 M 25 D	Female	Thai	Bangkok	<10	<10
298	Dog	2020-06-26	8 Y 11 M 25 D	Female	Golden Retriever Mix	Nakhon Pathom	<10	<10
299	Dog	2020-06-26	9 Y 10 M 8 D	Male	Golden Retriever	Nonthaburi	<10	<10
300	Dog	2020-06-26	5 Y 7 M 25 D	Female	Thai Bangkaew	Nakhon Pathom	<10	<10
301	Dog	2020-06-26	0 Y 6 M 28 D	Male	Siberian Husky	Nakhon Pathom	<10	<10
302	Dog	2020-06-26	8 Y 6 M 1 D	Male	Shih Tzu	Bangkok	<10	<10
303	Dog	2020-06-26	7 Y 6 M 25 D	Male	Thai	Bangkok	<10	<10
304	Dog	2020-06-26	12 Y 8 M 25 D	Female	Poodle	Nonthaburi	<10	<10
305	Dog	2020-06-26	3 Y 0 M 25 D	Male	Chihuahua	Samut Sakhon	<10	<10
306	Dog	2020-06-26	1 Y 10 M 25 D	Female	Thai	Bangkok	<10	<10
307	Dog	2020-06-26	3 Y 7 M 25 D	Female	Beagle	Bangkok	<10	<10
308	Dog	2020-06-26	11 Y 10 M 25 D	Female	Mixed Breed	Bangkok	<10	<10
309	Dog	2020-06-26	3 Y 0 M 25 D	Female	Labrador Retriever	Bangkok	<10	<10
310	Dog	2020-06-26	11 Y 0 M 25 D	Male	Shih Tzu	Bangkok	<10	<10
311	Dog	2020-06-26	8 Y 0 M 25 D	Male	Poodle	Nakhon Pathom	<10	<10
312	Dog	2020-06-26	5 Y 4 M 12 D	Male	Mixed Breed	Samut Sakhon	<10	<10
313	Dog	2020-06-26	0 Y 5 M 17 D	Male	Thai	Bangkok	<10	<10
314	Dog	2020-06-26	15 Y 2 M 25 D	Male	Poodle	Samut Prakan	<10	<10
315	Dog	2020-06-26	9 Y 10 M 21 D	Female	Shih Tzu	Nonthaburi	<10	<10
316	Dog	2020-06-26	10 Y 10 M 16 D	Female	Mixed Breed	Nonthaburi	<10	<10
317	Dog	2020-06-26	7 Y 6 M 17 D	Female	Thai Bangkaew	Bangkok	<10	<10
318	Dog	2020-06-26	8 Y 4 M 25 D	Female	Labrador Retriever	Nakhon Pathom	<10	<10
319	Dog	2020-06-26	14 Y 0 M 25 D	Female	Jack Russell Terrier	Samut Sakhon	<10	<10
320	Dog	2020-06-26	2 Y 3 M 25 D	Female	Alaskan Malamute	Bangkok	<10	<10
321	Dog	2020-06-26	9 Y 1 M 25 D	Male	Shih Tzu Mix	Nonthaburi	<10	<10
322	Dog	2020-06-26	11 Y 0 M 25 D	Male	Chihuahua	Bangkok	<10	<10
323	Dog	2020-06-26	0 Y 5 M 16 D	Female	Thai	Nakhon Pathom	<10	<10
324	Dog	2020-06-26	3 Y 1 M 15 D	Male	Golden Retriever	Bangkok	<10	<10
325	Dog	2020-06-26	6 Y 9 M 10 D	Female	Pomeranian	Bangkok	<10	<10
326	Dog	2020-06-26	13 Y 3 M 25 D	Female	Mixed Breed	Nonthaburi	<10	<10
327	Dog	2020-06-26	15 Y 0 M 25 D	Male	Thai	Nakhon Pathom	<10	<10
328	Dog	2020-06-26	0 Y 5 M 3 D	Male	American Bully	Nakhon Pathom	<10	<10
329	Dog	2020-06-26	N/A	Female	Thai Mix	Bangkok	<10	<10
330	Dog	2020-06-26	8 Y 6 M 1 D	Male	Shih Tzu	Bangkok	<10	<10
331	Dog	2020-06-26	16 Y 7 M 25 D	Female	Poodle	Bangkok	<10	<10
332	Dog	2020-06-26	4 Y 4 M 11 D	Female	Thai	Bangkok	<10	<10
333	Dog	2020-06-26	13 Y 3 M 25 D	Female	Shih Tzu	Bangkok	<10	<10
334	Dog	2020-06-26	8 Y 3 M 25 D	Male	Thai Ridgeback	Ratchaburi	<10	<10
335	Dog	2020-06-26	3 Y 0 M 25 D	Female	Pomeranian	Nakhon Pathom	<10	<10
336	Dog	2020-06-26	10 Y 8 M 25 D	Male	Thai	Nonthaburi	<10	<10
337	Dog	2020-06-26	8 Y 6 M 25 D	Female	Mixed Breed	Nonthaburi	<10	<10
338	Dog	2020-06-26	1 Y 11 M 11 D	Male	Chihuahua	Bangkok	<10	<10
339	Dog	2020-06-26	0 Y 8 M 25 D	Female	Mixed Breed	Bangkok	<10	<10
340	Dog	2020-06-26	11 Y 0 M 25 D	Male	Mixed Breed	Nonthaburi	<10	<10
341	Dog	2020-06-26	13 Y 10 M 25 D	Female	Labrador Retriever	Bangkok	<10	<10
342	Dog	2020-06-26	8 Y 0 M 25 D	Female	Thai	Bangkok	<10	<10
343	Dog	2020-06-26	3 Y 0 M 25 D	Male	Thai	Samut Sakhon	<10	<10
344	Cat	2020-06-26	8 Y 6 M 25 D	Female	Thai	Bangkok	<10	<10
345	Cat	2020-06-26	0 Y 8 M 25 D	Male	Siamese	Nakhon Pathom	<10	<10
346	Cat	2020-06-26	10 Y 0 M 25 D	Male	Thai	Nakhon Pathom	<10	<10
347	Cat	2020-06-26	1 Y 0 M 25 D	Female	Thai	Nakhon Pathom	<10	<10
348	Cat	2020-06-26	7 Y 10 M 25 D	Male	Siamese	Samut Sakhon	<10	<10
349	Cat	2020-06-26	16 Y 4 M 25 D	Female	Siamese	Bangkok	<10	<10
350	Cat	2020-06-26	7 Y 5 M 29 D	Male	Persian	Bangkok	<10	<10
351	Cat	2020-06-26	0 Y 11 M 30 D	Female	Mixed Breed	Nakhon Pathom	<10	<10
352	Cat	2020-06-26	2 Y 0 M 25 D	Male	Thai	Samut Prakan	<10	<10
353	Cat	2020-06-26	1 Y 0 M 25 D	Female	Thai	Nonthaburi	<10	<10
354	Cat	2020-06-26	0 Y 1 M 25 D	Female	Persian	Nakhon Pathom	<10	<10
355	Cat	2020-06-26	8 Y 6 M 25 D	Male	Thai	Nakhon Pathom	<10	<10
356	Cat	2020-06-26	3 Y 0 M 25 D	Male	Thai	Nakhon Pathom	<10	<10
357	Cat	2020-06-26	3 Y 0 M 21 D	Female	Thai	Samut Sakhon	<10	<10
358	Cat	2020-06-26	5 Y 0 M 25 D	Male	Thai	Nonthaburi	<10	<10
359	Cat	2020-06-26	0 Y 0 M 23 D	Female	Thai	Nakhon Pathom	<10	<10
360	Cat	2020-06-26	7 Y 0 M 25 D	Female	Mixed Breed	Samut Sakhon	<10	<10
361	Cat	2020-06-26	0 Y 4 M 25 D	Female	Thai	Bangkok	<10	<10
362	Cat	2020-06-26	3 Y 9 M 25 D	Male	Persian	Nakhon Pathom	<10	<10
363	Cat	2020-06-26	0 Y 1 M 25 D	Female	Thai	Pathum Thani	<10	<10
364	Cat	2020-06-26	5 Y 0 M 18 D	Female	Persian	Samut Sakhon	<10	<10
365	Cat	2020-06-26	11 Y 0 M 25 D	Male	Persian	Samut Sakhon	<10	<10
366	Cat	2020-06-26	3 Y 10 M 25 D	Male	Thai	Nakhon Pathom	<10	<10
367	Cat	2020-07-03	7 Y 9 M 2 D	Female	Thai	Bangkok	<10	<10
368	Cat	2020-07-03	3 Y 0 M 28 D	Female	Thai	Samut Sakhon	<10	<10
369	Cat	2020-07-03	10 Y 2 M 2 D	Female	Thai	Bangkok	<10	<10
370	Cat	2020-07-03	7 Y 1 M 2 D	Female	Persian	Bangkok	<10	<10
371	Cat	2020-07-03	6 Y 1 M 2 D	Female	Khao Manee	Bangkok	<10	<10
372	Cat	2020-07-03	6 Y 1 M 2 D	Female	Khao Manee	Bangkok	<10	<10
373	Cat	2020-07-03	1 Y 2 M 2 D	Male	Thai	Bangkok	<10	<10
374	Cat	2020-07-03	0 Y 3 M 2 D	Male	Thai	Samut Sakhon	<10	<10
375	Cat	2020-07-03	0 Y 2 M 2 D	Female	Persian	Nakhon Pathom	<10	<10
376	Cat	2020-07-03	0 Y 2 M 15 D	Male	Scottish Fold	Bangkok	<10	<10
377	Cat	2020-07-03	0 Y 7 M 18 D	Female	Maine Coon	Nakhon Pathom	<10	<10
378	Cat	2020-07-03	0 Y 6 M 4 D	Male	Maine Coon	Nakhon Pathom	<10	<10
379	Cat	2020-07-03	13 Y 1 M 2 D	Female	Thai	Bangkok	<10	<10
380	Cat	2020-07-03	17 Y 4 M 2 D	Female	Siamese	Bangkok	<10	<10
381	Cat	2020-07-03	1 Y 1 M 11 D	Female	Mixed Breed	Nonthaburi	<10	<10
382	Cat	2020-07-03	1 Y 4 M 2 D	Female	Thai	Bangkok	<10	<10
383	Cat	2020-07-03	6 Y 3 M 2 D	Male	Maine Coon	Nakhon Pathom	<10	<10
384	Cat	2020-07-03	5 Y 1 M 2 D	Female	Mixed Breed	Bangkok	<10	<10
385	Cat	2020-07-03	11 Y 4 M 2 D	Female	Thai	Bangkok	<10	<10
386	Cat	2020-07-03	3 Y 1 M 2 D	Male	Thai	Bangkok	<10	<10
387	Cat	2020-07-03	0 Y 1 M 2 D	Female	Thai	Bangkok	<10	<10
388	Cat	2020-07-03	8 Y 8 M 2 D	Female	Siamese	Samut Sakhon	<10	<10
389	Cat	2020-07-03	N/A	Female	Thai	Nakhon Pathom	<10	<10
390	Cat	2020-07-03	1 Y 11 M 5 D	Female	Scottish Fold	Bangkok	<10	<10
391	Cat	2020-07-03	1 Y 8 M 2 D	Male	Thai	Bangkok	<10	<10
392	Cat	2020-07-03	7 Y 5 M 2 D	Male	Thai	Nonthaburi	<10	<10
393	Cat	2020-07-03	0 Y 4 M 2 D	Male	Persian	Suphan Buri	<10	<10
394	Cat	2020-07-03	8 Y 1 M 2 D	Male	Thai	Nonthaburi	<10	<10
395	Cat	2020-07-03	1 Y 4 M 2 D	Female	Thai	Bangkok	<10	<10
396	Cat	2020-07-03	10 Y 1 M 2 D	Male	Persian	Nonthaburi	<10	<10
397	Cat	2020-07-03	0 Y 4 M 2 D	Male	Thai	Nakhon Pathom	<10	<10
398	Cat	2020-07-03	0 Y 9 M 6 D	Male	Thai	Pathum Thani	<10	<10
399	Cat	2020-07-03	1 Y 1 M 2 D	Male	Thai	Nakhon Pathom	<10	<10
400	Cat	2020-07-03	4 Y 3 M 13 D	Male	Thai	Samut Sakhon	<10	<10
401	Cat	2020-07-03	6 Y 9 M 6 D	Male	Siamese	Bangkok	<10	<10
402	Cat	2020-07-03	10 Y 2 M 2 D	Female	Persian	Bangkok	<10	<10
403	Cat	2020-07-03	3 Y 1 M 2 D	Female	Thai	Samut Prakan	<10	<10
404	Cat	2020-07-03	4 Y 10 M 2 D	Female	Siamese	Bangkok	<10	<10
405	Cat	2020-07-03	0 Y 5 M 2 D	Male	Thai	Samut Sakhon	<10	<10
406	Cat	2020-07-03	2 Y 11 M 2 D	Female	Ragdoll	Bangkok	<10	<10
407	Cat	2020-07-03	2 Y 11 M 2 D	Male	Thai	Nakhon Pathom	<10	<10
408	Cat	2020-07-03	1 Y 4 M 17 D	Male	Siamese	Bangkok	<10	<10
409	Cat	2020-07-03	1 Y 0 M 7 D	Female	Thai	Bangkok	<10	<10
410	Cat	2020-07-03	0 Y 1 M 2 D	Female	Thai	Nakhon Pathom	<10	<10
411	Cat	2020-07-03	14 Y 5 M 2 D	Female	Thai	Nonthaburi	<10	<10
412	Cat	2020-07-03	1 Y 11 M 25 D	Female	Thai	Bangkok	<10	<10
413	Cat	2020-07-03	10 Y 6 M 2 D	Female	Siamese	Bangkok	<10	<10
414	Cat	2020-07-03	12 Y 4 M 2 D	Female	Persian Mix	Nonthaburi	<10	<10
415	Cat	2020-07-03	0 Y 1 M 2 D	Female	Thai	Nonthaburi	<10	<10
416	Cat	2020-07-03	0 Y 0 M 5 D	Female	Thai	Bangkok	<10	<10
417	Cat	2020-07-03	1 Y 1 M 2 D	Female	Thai	Samut Sakhon	<10	<10
418	Cat	2020-07-03	1 Y 4 M 2 D	Male	American Shorthair	Nakhon Pathom	<10	<10
419	Cat	2020-07-03	12 Y 1 M 2 D	Male	British Shorthair	Bangkok	<10	<10
420	Dog	2020-07-03	5 Y 8 M 2 D	Female	Poodle	Bangkok	<10	<10
421	Dog	2020-07-03	6 Y 4 M 2 D	Male	Shih Tzu	Samut Sakhon	<10	<10
422	Dog	2020-07-03	9 Y 10 M 13 D	Male	Chihuahua	Bangkok	<10	<10
423	Dog	2020-07-03	11 Y 4 M 5 D	Male	Thai	Nonthaburi	<10	<10
424	Dog	2020-07-03	14 Y 5 M 2 D	Female	Yorkshire Terrier	Bangkok	<10	<10
425	Dog	2020-07-03	7 Y 10 M 2 D	Male	Pomeranian	Nakhon Pathom	<10	<10
426	Dog	2020-07-03	4 Y 4 M 9 D	Female	Shih Tzu	Bangkok	<10	<10
427	Dog	2020-07-03	4 Y 0 M 5 D	Female	Pomeranian	Samut Prakan	<10	<10
428	Dog	2020-07-03	10 Y 2 M 2 D	Female	Shih Tzu Mix	Bangkok	<10	<10
429	Cat	2020-07-03	1 Y 6 M 2 D	Male	Maine Coon	Nonthaburi	<10	<10
430	Dog	2020-07-03	11 Y 10 M 2 D	Female	Poodle	Bangkok	<10	<10
431	Dog	2020-07-03	9 Y 2 M 2 D	Male	Shih Tzu Mix	Nonthaburi	<10	<10
432	Dog	2020-07-03	8 Y 1 M 2 D	Male	German Shepherd	Nakhon Pathom	<10	<10
433	Dog	2020-07-03	7 Y 1 M 2 D	Male	Mixed Breed	Nonthaburi	<10	<10
434	Dog	2020-07-03	14 Y 8 M 2 D	Male	Labrador Retriever	Nakhon Pathom	<10	<10
435	Dog	2020-07-03	10 Y 5 M 6 D	Female	Mixed Breed	Nakhon Pathom	<10	<10
436	Dog	2020-07-03	13 Y 4 M 2 D	Female	Mixed Breed	Nonthaburi	<10	<10
437	Dog	2020-07-03	10 Y 9 M 2 D	Male	Thai	Bangkok	<10	<10
438	Dog	2020-07-03	6 Y 1 M 2 D	Male	Thai	Bangkok	<10	<10
439	Dog	2020-07-03	8 Y 1 M 2 D	Male	German Shepherd	Nakhon Pathom	<10	<10
440	Dog	2020-07-03	8 Y 1 M 2 D	Male	German Shepherd	Nakhon Pathom	<10	<10
441	Dog	2020-07-03	10 Y 4 M 2 D	Male	Mixed Breed	Bangkok	<10	<10
442	Dog	2020-07-03	2 Y 1 M 2 D	Female	Thai	Nakhon Pathom	<10	<10
443	Cat	2020-07-10	7 Y 5 M 9 D	Male	Thai	Nonthaburi	<10	<10
444	Cat	2020-07-10	1 Y 4 M 9 D	Female	Thai	Bangkok	<10	<10
445	Cat	2020-07-10	0 Y 8 M 4 D	Female	Scottish Fold	Bangkok	<10	<10
446	Cat	2020-07-10	3 Y 0 M 9 D	Male	Thai	Bangkok	<10	<10
447	Cat	2020-07-10	0 Y 0 M 12 D	Female	Thai	Bangkok	<10	<10
448	Cat	2020-07-10	0 Y 0 M 9 D	Female	Thai	Bangkok	<10	<10
449	Cat	2020-07-10	0 Y 0 M 9 D	Male	Thai	Nonthaburi	<10	<10
450	Cat	2020-07-10	3 Y 0 M 9 D	Male	Thai	Bangkok	<10	<10
451	Cat	2020-07-10	4 Y 3 M 20 D	Male	Thai	Samut Sakhon	<10	<10
452	Cat	2020-07-10	3 Y 11 M 9 D	Male	Thai	Nakhon Pathom	<10	<10
453	Cat	2020-07-10	0 Y 4 M 9 D	Female	Thai	Nakhon Pathom	<10	<10
454	Cat	2020-07-10	0 Y 3 M 10 D	Male	Thai	Bangkok	<10	<10
455	Cat	2020-07-10	15 Y 4 M 9 D	Female	Thai	Bangkok	<10	<10
456	Cat	2020-07-10	1 Y 4 M 24 D	Male	Siamese	Bangkok	<10	<10
457	Cat	2020-07-10	0 Y 4 M 11 D	Female	Exotic Shorthair	Bangkok	<10	<10
458	Cat	2020-07-10	1 Y 1 M 18 D	Female	Mixed Breed	Nonthaburi	<10	<10
459	Cat	2020-07-10	10 Y 0 M 9 D	Male	Himalayan	Samut Sakhon	<10	<10
460	Cat	2020-07-10	1 Y 5 M 7 D	Male	Persian	Bangkok	<10	<10
461	Cat	2020-07-10	8 Y 11 M 9 D	Female	Siamese	Bangkok	<10	<10
462	Cat	2020-07-10	0 Y 11 M 9 D	Female	Persian	Bangkok	<10	<10
463	Cat	2020-07-10	12 Y 4 M 9 D	Female	Persian Mix	Nonthaburi	<10	<10
464	Cat	2020-07-10	3 Y 6 M 9 D	Male	Thai	Bangkok	<10	<10
465	Cat	2020-07-10	5 Y 5 M 9 D	Male	Persian	Nakhon Pathom	<10	<10
466	Cat	2020-07-10	0 Y 4 M 9 D	Female	Munchkin	Bangkok	<10	<10
467	Cat	2020-07-10	2 Y 1 M 9 D	Male	Thai	Nonthaburi	<10	<10
468	Cat	2020-07-10	0 Y 9 M 9 D	Male	Siamese	Nakhon Pathom	<10	<10
469	Cat	2020-07-10	4 Y 4 M 9 D	Male	Exotic Longhair	Samut Sakhon	<10	<10
470	Cat	2020-07-10	12 Y 10 M 9 D	Male	Siamese	Pathum Thani	<10	<10
471	Cat	2020-07-10	1 Y 0 M 11 D	Male	Thai	Nakhon Pathom	<10	<10
472	Cat	2020-07-10	0 Y 8 M 9 D	Male	Thai	Nakhon Pathom	<10	<10
473	Cat	2020-07-10	3 Y 1 M 9 D	Male	Thai	Nakhon Pathom	<10	<10
474	Cat	2020-07-10	0 Y 1 M 9 D	Female	Thai	Nonthaburi	<10	<10
475	Cat	2020-07-10	18 Y 7 M 9 D	Female	Siamese	Nakhon Pathom	<10	<10
476	Cat	2020-07-10	15 Y 8 M 9 D	Female	Domestic Shorthair (DSH)	Bangkok	<10	<10
477	Cat	2020-07-10	2 Y 9 M 9 D	Male	Siamese	Samut Sakhon	<10	<10
478	Cat	2020-07-10	3 Y 1 M 5 D	Female	Thai	Samut Sakhon	<10	<10
479	Dog	2020-07-10	8 Y 2 M 9 D	Female	Chihuahua	Bangkok	<10	<10
480	Dog	2020-07-10	1 Y 0 M 3 D	Male	French Bulldog	Nonthaburi	<10	<10
481	Dog	2020-07-10	11 Y 6 M 9 D	Female	Mixed Breed	Bangkok	<10	<10
482	Dog	2020-07-10	7 Y 3 M 9 D	Female	Pomeranian	Bangkok	<10	<10
483	Dog	2020-07-10	2 Y 1 M 9 D	Female	American Pit Bull Terrier	Nakhon Pathom	<10	<10
484	Dog	2020-07-10	16 Y 2 M 15 D	Male	Miniature Pinscher	Bangkok	<10	<10
485	Dog	2020-07-10	12 Y 7 M 9 D	Female	Poodle Mix	Nonthaburi	<10	<10
486	Dog	2020-07-10	6 Y 0 M 11 D	Male	Beagle Mix	Nonthaburi	<10	<10
487	Dog	2020-07-10	6 Y 0 M 11 D	Male	Beagle Mix	Nonthaburi	<10	<10
488	Dog	2020-07-10	12 Y 6 M 20 D	Female	Thai Bangkaew	Bangkok	<10	<10
489	Dog	2020-07-10	8 Y 0 M 22 D	Female	Thai	Nakhon Pathom	<10	<10
490	Dog	2020-07-10	10 Y 1 M 9 D	Female	Thai	Bangkok	<10	<10
491	Dog	2020-07-10	3 Y 1 M 9 D	Male	Chihuahua	Samut Sakhon	<10	<10
492	Dog	2020-07-10	11 Y 10 M 9 D	Male	Mixed Breed	Samut Sakhon	<10	<10
493	Dog	2020-07-10	0 Y 0 M 11 D	Male	Thai	Bangkok	<10	<10
494	Dog	2020-07-10	6 Y 1 M 9 D	Male	Poodle	Bangkok	<10	<10
495	Dog	2020-07-10	17 Y 4 M 9 D	Female	Siberian Husky	Bangkok	<10	<10
496	Dog	2020-07-10	1 Y 8 M 11 D	Male	American Bully	Samut Sakhon	<10	<10
497	Dog	2020-07-10	13 Y 5 M 9 D	Male	Pug	Nakhon Pathom	<10	<10
498	Dog	2020-07-10	12 Y 6 M 9 D	Male	Miniature Pinscher	Nakhon Pathom	<10	<10
499	Dog	2020-07-10	9 Y 0 M 9 D	Male	Golden Retriever	Nonthaburi	<10	<10
500	Dog	2020-07-10	5 Y 1 M 9 D	Male	Beagle	Nakhon Pathom	<10	<10
501	Dog	2020-07-10	2 Y 1 M 9 D	Female	Thai	Nakhon Pathom	<10	<10
502	Dog	2020-07-10	9 Y 1 M 13 D	Male	Chihuahua	Samut Sakhon	<10	<10
503	Dog	2020-07-10	10 Y 0 M 21 D	Male	Thai	Samut Sakhon	<10	<10
504	Dog	2020-07-10	6 Y 1 M 9 D	Male	Thai	Bangkok	<10	<10
505	Dog	2020-07-10	10 Y 9 M 9 D	Male	Mixed Breed	Bangkok	<10	<10
506	Dog	2020-07-10	3 Y 3 M 25 D	Male	Pug	Bangkok	<10	<10
507	Dog	2020-07-10	4 Y 7 M 10 D	Male	Beagle	Bangkok	<10	<10
508	Dog	2020-07-10	14 Y 4 M 9 D	Female	Beagle	Samut Sakhon	<10	<10
509	Dog	2020-07-10	8 Y 1 M 9 D	Male	Beagle	Nakhon Pathom	<10	<10
510	Dog	2020-07-10	15 Y 6 M 9 D	Male	Poodle Mix	Bangkok	<10	<10
511	Dog	2020-07-10	0 Y 5 M 9 D	Female	Golden Retriever	Nakhon Pathom	<10	<10
512	Dog	2020-07-10	4 Y 5 M 9 D	Male	Pomeranian	Nakhon Pathom	<10	<10
513	Dog	2020-07-10	10 Y 4 M 8 D	Female	Shih Tzu	Samut Prakan	<10	<10
514	Dog	2020-07-10	5 Y 8 M 9 D	Female	Poodle	Bangkok	<10	<10
515	Dog	2020-07-10	8 Y 2 M 9 D	Male	Mixed Breed	Samut Sakhon	<10	<10
516	Dog	2020-07-10	14 Y 3 M 9 D	Male	Golden Retriever	Nonthaburi	<10	<10
517	Dog	2020-07-10	5 Y 1 M 9 D	Male	Beagle	Nakhon Pathom	<10	<10
518	Dog	2020-07-10	7 Y 3 M 28 D	Male	Beagle	Nonthaburi	<10	<10
519	Dog	2020-07-10	14 Y 10 M 9 D	Female	Shih Tzu	Bangkok	<10	<10
520	Dog	2020-07-10	10 Y 7 M 17 D	Female	Poodle	Samut Sakhon	<10	<10
521	Dog	2020-07-10	12 Y 10 M 4 D	Female	Mixed Breed	Samut Sakhon	<10	<10
522	Dog	2020-07-10	13 Y 1 M 9 D	Male	Shih Tzu	Bangkok	<10	<10
523	Dog	2020-07-10	14 Y 8 M 11 D	Female	Thai	Bangkok	<10	<10
524	Dog	2020-07-10	7 Y 1 M 9 D	Male	Mixed Breed	Nonthaburi	<10	<10
525	Dog	2020-07-10	12 Y 5 M 9 D	Male	Thai	Nonthaburi	<10	<10
526	Dog	2020-07-10	11 Y 10 M 9 D	Male	Chihuahua	Bangkok	<10	<10
527	Dog	2020-07-10	10 Y 4 M 9 D	Male	Mixed Breed	Bangkok	<10	<10
528	Dog	2020-07-10	0 Y 6 M 9 D	Male	Thai	Nakhon Pathom	<10	<10
529	Dog	2020-07-10	15 Y 1 M 9 D	Male	Thai	Nakhon Pathom	<10	<10
530	Dog	2020-07-10	11 Y 8 M 9 D	Male	Basset Hound	Bangkok	<10	<10
531	Dog	2020-07-10	14 Y 3 M 9 D	Male	Golden Retriever	Nonthaburi	<10	<10
532	Dog	2020-07-10	8 Y 7 M 1 D	Male	Thai Bangkaew	Ratchaburi	<10	<10
533	Dog	2020-07-10	9 Y 1 M 9 D	Female	Mixed Breed	Nakhon Pathom	<10	<10
534	Dog	2020-07-10	11 Y 1 M 9 D	Female	Golden Retriever	Samut Sakhon	<10	<10
535	Dog	2020-07-10	14 Y 3 M 9 D	Male	Golden Retriever	Nonthaburi	<10	<10
536	Dog	2020-07-10	2 Y 1 M 9 D	Female	Thai	Nakhon Pathom	<10	<10
537	Dog	2020-07-10	10 Y 1 M 9 D	Male	Golden Retriever	Nonthaburi	<10	<10
538	Dog	2020-07-10	12 Y 8 M 9 D	Male	Shih Tzu	Bangkok	<10	<10
539	Dog	2020-07-10	17 Y 2 M 9 D	Female	Shih Tzu	Bangkok	<10	<10
540	Dog	2020-07-10	3 Y 6 M 8 D	Female	Chihuahua	Ratchaburi	<10	<10
541	Dog	2020-07-10	0 Y 10 M 8 D	Male	Beagle	Nonthaburi	<10	<10
542	Dog	2020-07-10	0 Y 0 M 9 D	Male	Mixed Breed	Nakhon Pathom	<10	<10
543	Dog	2020-07-15	12 Y 3 M 14 D	Female	Samoyed	Bangkok	<10	<10
544	Dog	2020-07-15	10 Y 2 M 14 D	Female	Mixed Breed	Bangkok	<10	<10
545	Dog	2020-07-15	9 Y 0 M 14 D	Female	Mixed Breed	Nonthaburi	<10	<10
546	Dog	2020-07-15	9 Y 1 M 14 D	Male	Poodle	Nonthaburi	<10	<10
547	Dog	2020-07-15	5 Y 0 M 14 D	Female	Pomeranian Mix	Nonthaburi	<10	<10
548	Dog	2020-07-15	9 Y 6 M 14 D	Male	Mixed Breed	Samut Sakhon	<10	<10
549	Dog	2020-07-15	10 Y 6 M 14 D	Female	Shih Tzu	Bangkok	<10	<10
550	Dog	2020-07-15	14 Y 8 M 14 D	Male	Labrador Retriever	Nakhon Pathom	<10	<10
551	Dog	2020-07-15	11 Y 2 M 14 D	Female	Thai	Bangkok	<10	<10
552	Dog	2020-07-15	11 Y 6 M 14 D	Female	Mixed Breed	Bangkok	<10	<10
553	Dog	2020-07-15	7 Y 8 M 24 D	Male	Siberian Husky	Nonthaburi	<10	<10
554	Cat	2020-07-15	0 Y 10 M 0 D	Male	Bengal	Bangkok	<10	<10
555	Cat	2020-07-15	2 Y 9 M 14 D	Male	Siamese	Bangkok	<10	<10
556	Cat	2020-07-15	16 Y 6 M 17 D	Female	Thai	Bangkok	<10	<10
557	Cat	2020-07-15	15 Y 1 M 14 D	Female	Siamese	Nonthaburi	<10	<10
558	Cat	2020-07-15	1 Y 8 M 14 D	Male	Thai	Bangkok	<10	<10
559	Cat	2020-07-15	5 Y 0 M 14 D	Male	Thai	Bangkok	<10	<10
560	Cat	2020-07-15	2 Y 0 M 14 D	Female	Thai	Bangkok	<10	<10
561	Cat	2020-07-15	1 Y 0 M 14 D	Male	Thai	Nonthaburi	<10	<10
562	Cat	2020-07-15	12 Y 0 M 14 D	Female	Thai	Nonthaburi	<10	<10
563	Cat	2020-07-15	0 Y 0 M 7 D	Male	Thai	Samut Sakhon	<10	<10
564	Cat	2020-07-15	3 Y 0 M 14 D	Male	Thai	Nakhon Pathom	<10	<10
565	Cat	2020-07-15	1 Y 8 M 14 D	Male	Thai	Bangkok	<10	<10
566	Cat	2020-07-15	1 Y 3 M 21 D	Male	American Shorthair	Nakhon Pathom	<10	<10
567	Cat	2020-07-15	3 Y 5 M 14 D	Female	Thai	Nakhon Pathom	<10	<10
568	Cat	2020-07-17	0 Y 0 M 16 D	Male	Thai	Nonthaburi	<10	<10
569	Cat	2020-07-17	2 Y 1 M 16 D	Male	Thai	Nonthaburi	<10	<10
570	Cat	2020-07-17	10 Y 1 M 16 D	Male	Persian	Nonthaburi	<10	<10
571	Cat	2020-07-17	0 Y 11 M 16 D	Female	Persian	Bangkok	<10	<10
572	Cat	2020-07-17	0 Y 0 M 9 D	Male	Thai	Samut Sakhon	<10	<10
573	Cat	2020-07-17	3 Y 2 M 16 D	Male	Mixed Breed	Bangkok	<10	<10
574	Cat	2020-07-17	2 Y 3 M 10 D	Female	Thai	Bangkok	<10	<10
575	Cat	2020-07-17	16 Y 10 M 16 D	Female	Siamese	Samut Sakhon	<10	<10
576	Cat	2020-07-17	2 Y 5 M 8 D	Male	Siamese	Bangkok	<10	<10
577	Dog	2020-07-17	8 Y 10 M 16 D	Female	Beagle	Bangkok	<10	<10
578	Dog	2020-07-17	6 Y 8 M 16 D	Male	Thai Bangkaew Mix	Samut Sakhon	<10	<10
579	Dog	2020-07-17	1 Y 9 M 24 D	Male	Chihuahua	Nakhon Pathom	<10	<10
580	Dog	2020-07-17	10 Y 0 M 16 D	Male	Mixed Breed	Nakhon Pathom	<10	<10
581	Dog	2020-07-17	1 Y 2 M 16 D	Male	Mixed Breed	Nakhon Pathom	<10	<10
582	Dog	2020-07-17	6 Y 2 M 6 D	Male	Thai	Bangkok	<10	<10
583	Dog	2020-07-21	3 Y 11 M 27 D	Female	Beagle	Bangkok	<10	<10
584	Dog	2020-07-21	5 Y 10 M 20 D	Female	Chihuahua	Nonthaburi	<10	<10
585	Dog	2020-07-21	12 Y 5 M 20 D	Female	Mixed Breed	Nakhon Pathom	<10	<10
586	Dog	2020-07-21	10 Y 3 M 11 D	Male	Mixed Breed	Nakhon Pathom	<10	<10
587	Dog	2020-07-21	5 Y 11 M 20 D	Female	Pomeranian	Samut Sakhon	<10	<10
588	Dog	2020-07-21	11 Y 6 M 7 D	Female	Beagle	Bangkok	<10	<10
589	Dog	2020-07-21	4 Y 1 M 19 D	Female	Thai	Bangkok	<10	<10
590	Dog	2020-07-21	17 Y 0 M 20 D	Female	Mixed Breed	Bangkok	<10	<10
591	Dog	2020-07-21	14 Y 9 M 20 D	Female	Rottweiler	Bangkok	<10	<10
592	Dog	2020-07-21	0 Y 0 M 11 D	Female	N/A	Nakhon Pathom	<10	<10
593	Dog	2020-07-21	14 Y 0 M 20 D	Male	Mixed Breed	Bangkok	<10	<10
594	Dog	2020-07-21	11 Y 3 M 20 D	Female	Poodle	Bangkok	<10	<10
595	Dog	2020-07-21	12 Y 10 M 20 D	Male	Thai	Bangkok	<10	<10
596	Dog	2020-07-21	14 Y 5 M 20 D	Male	Mixed Breed	Nonthaburi	<10	<10
597	Dog	2020-07-21	8 Y 2 M 20 D	Female	Chihuahua	Nakhon Pathom	<10	<10
598	Dog	2020-07-21	12 Y 8 M 20 D	Female	Thai	Nonthaburi	<10	<10
599	Dog	2020-07-21	7 Y 1 M 20 D	Male	American Pit Bull Terrier	Bangkok	<10	<10
600	Dog	2020-07-21	9 Y 8 M 6 D	Female	Poodle Mix	Nakhon Pathom	<10	<10
601	Dog	2020-07-21	10 Y 1 M 20 D	Male	Golden Retriever	Nonthaburi	<10	<10
602	Dog	2020-07-21	12 Y 9 M 18 D	Male	Mixed Breed	Nakhon Pathom	<10	<10
603	Dog	2020-07-21	6 Y 0 M 20 D	Male	Chihuahua	Nonthaburi	<10	<10
604	Dog	2020-07-21	1 Y 2 M 20 D	Female	American Pit Bull Terrier	Bangkok	<10	<10
605	Dog	2020-07-21	0 Y 0 M 6 D	Male	Thai	Bangkok	<10	<10
606	Dog	2020-07-21	10 Y 1 M 20 D	Female	Thai	Nakhon Pathom	<10	<10
607	Dog	2020-07-21	15 Y 0 M 20 D	Male	Thai	Bangkok	<10	<10
608	Dog	2020-07-21	0 Y 9 M 5 D	Female	Thai	Nakhon Pathom	<10	<10
609	Dog	2020-07-21	12 Y 3 M 0 D	Male	Shih Tzu	Bangkok	<10	<10
610	Dog	2020-07-21	12 Y 3 M 20 D	Male	Mixed Breed	Nonthaburi	<10	<10
611	Dog	2020-07-21	12 Y 0 M 20 D	Male	Mixed Breed	Bangkok	<10	<10
612	Dog	2020-07-21	0 Y 6 M 20 D	Female	American Bully	Nonthaburi	<10	<10
613	Dog	2020-07-21	7 Y 0 M 20 D	Male	Chihuahua	Nonthaburi	<10	<10
614	Dog	2020-07-21	1 Y 4 M 5 D	Male	Yorkshire Terrier	Bangkok	<10	<10
615	Dog	2020-07-21	16 Y 0 M 20 D	Male	Akita Inu	Bangkok	<10	<10
616	Dog	2020-07-21	7 Y 9 M 0 D	Male	Siberian Husky	Nonthaburi	<10	<10
617	Dog	2020-07-21	7 Y 10 M 20 D	Male	Pomeranian	Nakhon Pathom	<10	<10
618	Dog	2020-07-21	1 Y 3 M 20 D	Female	Chihuahua	Bangkok	<10	<10
619	Dog	2020-07-21	17 Y 1 M 20 D	Male	Poodle	Bangkok	<10	<10
620	Dog	2020-07-21	1 Y 4 M 19 D	Male	American Bully	Samut Sakhon	<10	<10
621	Dog	2020-07-21	10 Y 8 M 15 D	Female	Thai	Nonthaburi	<10	<10
622	Dog	2020-07-21	2 Y 1 M 19 D	Female	Siberian Husky	Bangkok	<10	<10
623	Dog	2020-07-21	15 Y 0 M 20 D	Female	Thai	Bangkok	<10	<10
624	Dog	2020-07-21	14 Y 1 M 20 D	Male	Thai	Nakhon Pathom	<10	<10
625	Dog	2020-07-21	0 Y 7 M 20 D	Male	Mixed Breed	Bangkok	<10	<10
626	Dog	2020-07-21	12 Y 1 M 20 D	Male	Dalmatian	Bangkok	<10	<10
627	Dog	2020-07-21	4 Y 0 M 8 D	Female	Mixed Breed	Nonthaburi	<10	<10
628	Dog	2020-07-21	4 Y 4 M 10 D	Male	Siberian Husky	Bangkok	<10	<10
629	Dog	2020-07-21	8 Y 8 M 29 D	Female	Labrador Retriever	Nakhon Pathom	<10	<10
630	Dog	2020-07-21	8 Y 9 M 20 D	Male	Poodle Mix	Bangkok	<10	<10
631	Dog	2020-07-21	12 Y 7 M 1 D	Female	Thai Bangkaew	Bangkok	<10	<10
632	Dog	2020-07-21	N/A	N/A	N/A	Nonthaburi	<10	<10
633	Dog	2020-07-21	7 Y 10 M 20 D	Male	Pomeranian	Nakhon Pathom	<10	<10
634	Cat	2020-07-21	11 Y 6 M 6 D	Female	Khao Manee	Nonthaburi	<10	<10
635	Cat	2020-07-21	0 Y 0 M 20 D	Female	Thai	Samut Sakhon	<10	<10
636	Cat	2020-07-21	1 Y 6 M 20 D	Female	Thai	Nakhon Pathom	<10	<10
637	Cat	2020-07-21	11 Y 0 M 20 D	Female	Thai	Nakhon Pathom	<10	<10
638	Cat	2020-07-21	2 Y 0 M 20 D	Male	Mixed Breed	Bangkok	<10	<10
639	Cat	2020-07-21	2 Y 0 M 20 D	Male	Domestic Shorthair (DSH)	Nonthaburi	<10	<10
640	Cat	2020-07-21	7 Y 0 M 20 D	Female	Siamese	Nakhon Pathom	<10	<10
641	Cat	2020-07-21	1 Y 0 M 7 D	Female	Thai	Samut Sakhon	<10	<10
642	Cat	2020-07-21	13 Y 0 M 20 D	Male	Siamese	Bangkok	<10	<10
643	Cat	2020-07-21	2 Y 1 M 20 D	Male	Thai	Nonthaburi	<10	<10
644	Cat	2020-07-21	0 Y 4 M 20 D	Male	British Shorthair	Samut Sakhon	<10	<10
645	Cat	2020-07-21	0 Y 1 M 20 D	Female	Thai	Bangkok	<10	<10
646	Cat	2020-07-21	0 Y 0 M 13 D	Male	Thai	Samut Sakhon	<10	<10
647	Cat	2020-07-21	4 Y 9 M 20 D	Male	Persian	Bangkok	<10	<10
648	Cat	2020-07-21	7 Y 0 M 20 D	Female	Thai	Bangkok	<10	<10
649	Cat	2020-07-21	6 Y 8 M 20 D	Male	Exotic Shorthair	Nonthaburi	<10	<10
650	Cat	2020-07-21	1 Y 11 M 10 D	Male	Thai	Nonthaburi	<10	<10
651	Cat	2020-07-21	15 Y 5 M 7 D	Female	Thai	Nakhon Pathom	<10	<10
652	Cat	2020-07-21	2 Y 11 M 4 D	Male	Siamese	Bangkok	<10	<10
653	Cat	2020-07-21	3 Y 0 M 7 D	Female	Thai	Nonthaburi	<10	<10
654	Cat	2020-07-21	3 Y 3 M 20 D	Male	Siamese	Bangkok	<10	<10
655	Cat	2020-07-21	2 Y 1 M 20 D	Male	Thai	Nonthaburi	<10	<10
656	Cat	2020-07-21	7 Y 11 M 20 D	Male	Siamese	Samut Sakhon	<10	<10
657	Cat	2020-07-21	4 Y 7 M 9 D	Female	Persian	Nonthaburi	<10	<10
658	Cat	2020-07-21	0 Y 5 M 20 D	Female	Persian	Nakhon Pathom	<10	<10
659	Cat	2020-07-21	15 Y 2 M 20 D	Female	Thai	Bangkok	<10	<10
660	Cat	2020-07-21	2 Y 6 M 20 D	Female	Thai	Bangkok	<10	<10
661	Cat	2020-07-21	3 Y 0 M 20 D	Female	Thai	Nakhon Pathom	<10	<10
662	Cat	2020-07-21	2 Y 1 M 20 D	Female	Thai	Bangkok	<10	<10
663	Cat	2020-07-21	0 Y 8 M 20 D	Female	Siamese	Bangkok	<10	<10
664	Cat	2020-07-21	14 Y 6 M 20 D	Female	Thai	Bangkok	<10	<10
665	Cat	2020-07-29	0 Y 0 M 7 D	Male	N/A	Bangkok	<10	<10
666	Cat	2020-07-29	2 Y 0 M 28 D	Male	Domestic Shorthair (DSH)	Nonthaburi	<10	<10
667	Cat	2020-07-29	4 Y 9 M 28 D	Male	Persian	Bangkok	<10	<10
668	Cat	2020-07-29	8 Y 4 M 7 D	Female	Exotic Shorthair Mix	Nonthaburi	<10	<10
669	Cat	2020-07-29	12 Y 4 M 28 D	Female	Persian Mix	Nonthaburi	<10	<10
670	Cat	2020-07-29	1 Y 0 M 28 D	Male	Domestic Shorthair (DSH)	Bangkok	<10	<10
671	Cat	2020-07-29	5 Y 1 M 21 D	Female	Persian	Samut Sakhon	<10	<10
672	Cat	2020-07-29	7 Y 11 M 28 D	Male	Siamese	Samut Sakhon	<10	<10
673	Cat	2020-07-29	17 Y 4 M 28 D	Female	Siamese	Bangkok	<10	<10
674	Cat	2020-07-29	1 Y 0 M 5 D	Male	Persian	Nakhon Pathom	<10	<10
675	Cat	2020-07-29	13 Y 0 M 28 D	Female	Siamese	Bangkok	<10	<10
676	Cat	2020-07-29	2 Y 4 M 6 D	Female	Scottish Fold	Bangkok	<10	<10
677	Cat	2020-07-29	0 Y 8 M 11 D	Male	Scottish Fold	Nakhon Pathom	<10	<10
678	Cat	2020-07-29	0 Y 10 M 28 D	Male	Domestic Shorthair (DSH)	Nonthaburi	<10	<10
679	Cat	2020-07-29	4 Y 8 M 24 D	Female	Thai	Nakhon Pathom	<10	<10
680	Cat	2020-07-29	0 Y 0 M 21 D	Male	Thai	Samut Sakhon	<10	<10
681	Cat	2020-07-29	7 Y 0 M 5 D	Male	Persian	Bangkok	<10	<10
682	Cat	2020-07-29	13 Y 8 M 5 D	Male	Persian Mix	Bangkok	<10	<10
683	Cat	2020-07-29	6 Y 0 M 28 D	Male	Persian	Samut Sakhon	<10	<10
684	Cat	2020-07-29	1 Y 6 M 28 D	Male	Thai	Nakhon Pathom	<10	<10
685	Cat	2020-07-29	0 Y 6 M 16 D	Female	Thai	Bangkok	<10	<10
686	Cat	2020-07-29	4 Y 0 M 28 D	Male	Thai	Bangkok	<10	<10
687	Cat	2020-07-29	1 Y 4 M 28 D	Female	Thai	Bangkok	<10	<10
688	Cat	2020-07-29	1 Y 10 M 28 D	Female	Siamese	Nakhon Pathom	<10	<10
689	Cat	2020-07-29	6 Y 9 M 28 D	Female	Siamese	Bangkok	<10	<10
690	Cat	2020-07-29	5 Y 0 M 28 D	Male	Thai	Nakhon Pathom	<10	<10
691	Cat	2020-07-29	1 Y 10 M 28 D	Female	N/A	Samut Sakhon	<10	<10
692	Cat	2020-07-29	5 Y 4 M 28 D	Male	Thai	Bangkok	<10	<10
693	Cat	2020-07-29	10 Y 6 M 28 D	Female	Siamese	Bangkok	<10	<10
694	Cat	2020-07-29	1 Y 0 M 15 D	Female	Thai	Bangkok	<10	<10
695	Cat	2020-07-29	5 Y 0 M 28 D	Male	Ragdoll	Samut Sakhon	<10	<10
696	Cat	2020-07-29	5 Y 0 M 28 D	Male	Ragdoll	Samut Sakhon	<10	<10
697	Cat	2020-07-29	0 Y 1 M 28 D	Male	Thai	Nonthaburi	<10	<10
698	Cat	2020-07-29	0 Y 4 M 8 D	Female	Thai	Bangkok	<10	<10
699	Cat	2020-07-29	8 Y 11 M 28 D	Male	Thai	Bangkok	<10	<10
700	Cat	2020-07-29	0 Y 4 M 7 D	Female	Siamese	Bangkok	<10	<10
701	Cat	2020-07-29	7 Y 2 M 28 D	Male	Siamese	Bangkok	<10	<10
702	Cat	2020-07-29	0 Y 11 M 15 D	Male	American Shorthair	Nakhon Pathom	<10	<10
703	Cat	2020-07-29	6 Y 11 M 28 D	Female	Siamese	Bangkok	<10	<10
704	Cat	2020-07-29	11 Y 2 M 29 D	Female	Siamese	Bangkok	<10	<10
705	Cat	2020-07-29	0 Y 2 M 28 D	Female	Thai	Nakhon Pathom	<10	<10
706	Cat	2020-07-29	0 Y 9 M 28 D	Male	Siamese	Nakhon Pathom	<10	<10
707	Cat	2020-07-29	7 Y 4 M 28 D	Female	Thai	Nakhon Pathom	<10	<10
708	Cat	2020-07-29	0 Y 2 M 28 D	Female	Thai	Pathum Thani	<10	<10
709	Cat	2020-07-29	0 Y 0 M 14 D	Female	Mixed Breed	Bangkok	<10	<10
710	Cat	2020-07-29	0 Y 10 M 28 D	Male	Domestic Shorthair (DSH)	Nonthaburi	<10	<10
711	Dog	2020-07-29	N/A	N/A	N/A	Kanchanaburi	<10	<10
712	Dog	2020-07-29	9 Y 0 M 28 D	Male	Thai	Bangkok	<10	<10
713	Dog	2020-07-29	0 Y 8 M 28 D	Female	Thai Ridgeback	Nakhon Pathom	<10	<10
714	Dog	2020-07-29	0 Y 5 M 11 D	Female	Thai	Nakhon Pathom	<10	<10
715	Dog	2020-07-29	3 Y 11 M 28 D	Male	Mixed Breed	Bangkok	<10	<10
716	Dog	2020-07-29	2 Y 0 M 28 D	Male	Mixed Breed	Nakhon Pathom	<10	<10
717	Dog	2020-07-29	17 Y 0 M 28 D	Male	Poodle	Nonthaburi	<10	<10
718	Dog	2020-07-29	8 Y 6 M 28 D	Male	French Bulldog	Bangkok	<10	<10
719	Dog	2020-07-29	6 Y 4 M 28 D	Male	Bulldog	Bangkok	<10	<10
720	Dog	2020-07-29	12 Y 2 M 28 D	Male	Chihuahua	Samut Sakhon	<10	<10
721	Dog	2020-07-29	8 Y 0 M 28 D	Male	Poodle	Bangkok	<10	<10
722	Dog	2020-07-29	9 Y 2 M 2 D	Male	Chihuahua	Samut Sakhon	<10	<10
723	Dog	2020-07-29	14 Y 1 M 28 D	Male	Thai	Nakhon Pathom	<10	<10
724	Dog	2020-07-29	12 Y 8 M 28 D	Female	Thai	Nonthaburi	<10	<10
725	Dog	2020-07-29	4 Y 0 M 28 D	Female	Thai	Ratchaburi	<10	<10
726	Dog	2020-07-29	12 Y 5 M 28 D	Male	Chihuahua	Nonthaburi	<10	<10
727	Dog	2020-07-29	13 Y 11 M 28 D	Female	Mixed Breed	Bangkok	<10	<10
728	Dog	2020-07-29	13 Y 5 M 28 D	Male	Poodle	Bangkok	<10	<10
729	Dog	2020-07-29	11 Y 7 M 28 D	Male	Shih Tzu	Bangkok	<10	<10
730	Dog	2020-07-29	0 Y 9 M 13 D	Female	Thai	Nakhon Pathom	<10	<10
731	Dog	2020-07-29	12 Y 7 M 9 D	Female	Thai Bangkaew	Bangkok	<10	<10
732	Dog	2020-07-29	5 Y 1 M 28 D	Female	Siberian Husky	Bangkok	<10	<10
733	Dog	2020-07-29	7 Y 11 M 28 D	Female	Mixed Breed	Nakhon Pathom	<10	<10
734	Dog	2020-07-29	6 Y 0 M 28 D	Male	Mixed Breed	Bangkok	<10	<10
735	Dog	2020-07-29	15 Y 0 M 28 D	Male	Pomeranian	Nonthaburi	<10	<10
736	Dog	2020-07-29	8 Y 8 M 4 D	Male	Mixed Breed	Bangkok	<10	<10
737	Dog	2020-07-29	1 Y 4 M 13 D	Male	Yorkshire Terrier	Bangkok	<10	<10
738	Dog	2020-07-29	1 Y 4 M 27 D	Male	American Bully	Samut Sakhon	<10	<10
739	Dog	2020-07-29	4 Y 0 M 28 D	Male	Thai	Bangkok	<10	<10
740	Dog	2020-07-29	15 Y 4 M 5 D	Male	Poodle	Nonthaburi	<10	<10
741	Dog	2020-07-29	4 Y 0 M 1 D	Male	Pomeranian Mix	Nonthaburi	<10	<10
742	Dog	2020-07-29	2 Y 5 M 20 D	Female	Thai Ridgeback	Bangkok	<10	<10
743	Dog	2020-07-29	10 Y 9 M 28 D	Female	Mixed Breed	Bangkok	<10	<10
744	Dog	2020-07-29	0 Y 11 M 28 D	Female	Mixed Breed	Bangkok	<10	<10
745	Dog	2020-07-29	10 Y 1 M 28 D	Male	Thai	Nakhon Pathom	<10	<10
746	Dog	2020-07-29	10 Y 5 M 19 D	Female	Beagle	Nakhon Pathom	<10	<10
747	Dog	2020-07-29	5 Y 0 M 28 D	Female	Siberian Husky	Bangkok	<10	<10
748	Dog	2020-07-29	9 Y 0 M 28 D	Female	Golden Retriever Mix	Nakhon Pathom	<10	<10
749	Dog	2020-07-29	15 Y 0 M 28 D	Female	Thai	Bangkok	<10	<10
750	Dog	2020-07-29	7 Y 0 M 28 D	Female	Thai	Bangkok	<10	<10
751	Dog	2020-07-29	1 Y 0 M 27 D	Female	Thai	Nakhon Pathom	<10	<10
752	Dog	2020-07-29	13 Y 0 M 28 D	Male	Shih Tzu	Samut Sakhon	<10	<10
753	Dog	2020-07-29	14 Y 11 M 28 D	Male	Poodle	Bangkok	<10	<10
754	Dog	2020-07-29	18 Y 0 M 5 D	Female	Shih Tzu	Bangkok	<10	<10
755	Dog	2020-07-29	13 Y 0 M 28 D	Female	Mixed Breed	Bangkok	<10	<10
756	Dog	2020-07-29	13 Y 3 M 28 D	Male	Thai	Bangkok	<10	<10
757	Dog	2020-07-29	15 Y 5 M 28 D	Female	Terrier Mix	Nakhon Pathom	<10	<10
758	Dog	2020-07-29	6 Y 5 M 28 D	Female	Shih Tzu	Bangkok	<10	<10
759	Dog	2020-07-29	10 Y 6 M 28 D	Female	Poodle	Samut Sakhon	<10	<10
760	Dog	2020-07-29	7 Y 2 M 11 D	Male	German Shepherd	Bangkok	<10	<10
761	Dog	2020-07-29	13 Y 3 M 28 D	Male	Thai	Bangkok	<10	<10
762	Dog	2020-07-29	13 Y 7 M 28 D	Male	Mixed Breed	Nonthaburi	<10	<10
763	Dog	2020-07-29	7 Y 0 M 28 D	Male	Poodle	Samut Sakhon	<10	<10
764	Dog	2020-07-29	2 Y 6 M 28 D	Female	Great Dane	Samut Sakhon	<10	<10
765	Dog	2020-07-29	12 Y 2 M 28 D	Female	Shih Tzu	Pathum Thani	<10	<10
766	Dog	2020-07-29	12 Y 0 M 25 D	Male	Mixed Breed	Nonthaburi	<10	<10
767	Dog	2020-07-31	15 Y 10 M 30 D	Female	Mixed Breed	Bangkok	<10	<10
768	Dog	2020-07-31	5 Y 1 M 30 D	Female	Thai	Nonthaburi	<10	<10
769	Dog	2020-07-31	N/A	N/A	N/A	Bangkok	<10	<10
770	Dog	2020-07-31	9 Y 10 M 30 D	Male	Golden Retriever	Bangkok	<10	<10
771	Dog	2020-07-31	8 Y 6 M 30 D	Male	French Bulldog	Bangkok	<10	<10
772	Dog	2020-07-31	5 Y 0 M 30 D	Male	Mixed Breed	Samut Sakhon	<10	<10
773	Dog	2020-07-31	N/A	N/A	N/A	Samut Sakhon	<10	<10
774	Dog	2020-07-31	16 Y 3 M 30 D	Male	Poodle	Nakhon Pathom	<10	<10
775	Dog	2020-07-31	6 Y 0 M 30 D	Male	Poodle Mix	Bangkok	<10	<10
776	Dog	2020-07-31	10 Y 6 M 4 D	Female	Mixed Breed	Nakhon Pathom	<10	<10
777	Dog	2020-07-31	9 Y 6 M 30 D	Female	Shih Tzu	Bangkok	<10	<10
778	Dog	2020-07-31	11 Y 10 M 26 D	Female	Thai	Bangkok	<10	<10
779	Dog	2020-07-31	0 Y 3 M 30 D	Male	Mixed Breed	Nonthaburi	<10	<10
780	Dog	2020-07-31	5 Y 0 M 30 D	Female	Siberian Husky	Bangkok	<10	<10
781	Dog	2020-07-31	13 Y 7 M 30 D	Male	Mixed Breed	Nonthaburi	<10	<10
782	Dog	2020-07-31	5 Y 0 M 30 D	Male	Thai	Nonthaburi	<10	<10
783	Dog	2020-07-31	3 Y 0 M 30 D	Female	Mixed Breed	Bangkok	<10	<10
784	Dog	2020-07-31	10 Y 0 M 30 D	Male	Labrador Retriever	Bangkok	<10	<10
785	Dog	2020-07-31	3 Y 0 M 30 D	Male	Great Dane	Pathum Thani	<10	<10
786	Dog	2020-07-31	8 Y 0 M 9 D	Male	Beagle	Nakhon Pathom	<10	<10
787	Dog	2020-07-31	10 Y 0 M 30 D	Female	Chihuahua	Nakhon Pathom	<10	<10
788	Cat	2020-07-31	12 Y 11 M 30 D	Female	Persian	Nakhon Pathom	<10	<10
789	Dog	2020-07-31	13 Y 11 M 30 D	Female	Pomeranian	Nonthaburi	<10	<10
790	Dog	2020-07-31	12 Y 0 M 30 D	Male	Thai	Bangkok	<10	<10
791	Dog	2020-07-31	0 Y 6 M 0 D	Male	Siberian Husky	Nakhon Pathom	<10	<10
792	Dog	2020-07-31	4 Y 9 M 22 D	Male	Siberian Husky	Bangkok	<10	<10
793	Dog	2020-07-31	4 Y 0 M 1 D	Male	Chihuahua	Bangkok	<10	<10
794	Dog	2020-07-31	11 Y 3 M 30 D	Male	Poodle	Bangkok	<10	<10
795	Dog	2020-07-31	15 Y 0 M 30 D	Male	Pomeranian	Nonthaburi	<10	<10
796	Dog	2020-07-31	16 Y 2 M 30 D	Female	Mixed Breed	Samut Prakan	<10	<10
797	Dog	2020-07-31	16 Y 8 M 30 D	Female	Poodle	Bangkok	<10	<10
798	Dog	2020-07-31	13 Y 3 M 30 D	Male	Thai	Bangkok	<10	<10
799	Dog	2020-07-31	9 Y 9 M 30 D	Male	Poodle	Nonthaburi	<10	<10
800	Dog	2020-07-31	6 Y 1 M 20 D	Female	Siberian Husky	Bangkok	<10	<10
801	Dog	2020-07-31	0 Y 9 M 30 D	Female	Mixed Breed	Bangkok	<10	<10
802	Dog	2020-07-31	14 Y 1 M 15 D	Female	Shih Tzu	Nonthaburi	<10	<10
803	Cat	2020-07-31	N/A	Female	American Shorthair	Bangkok	<10	<10
804	Dog	2020-07-31	7 Y 6 M 30 D	Male	Alaskan Malamute	Nakhon Pathom	<10	<10
805	Dog	2020-07-31	3 Y 11 M 30 D	Male	Mixed Breed	Bangkok	<10	<10
806	Dog	2020-07-31	2 Y 0 M 30 D	Male	Mixed Breed	Nakhon Pathom	<10	<10
807	Dog	2020-07-31	10 Y 2 M 30 D	Female	Golden Retriever	Bangkok	<10	<10
808	Dog	2020-07-31	12 Y 0 M 30 D	Female	Thai	Nonthaburi	<10	<10
809	Dog	2020-07-31	13 Y 11 M 30 D	Female	Labrador Retriever	Bangkok	<10	<10
810	Dog	2020-07-31	6 Y 6 M 22 D	Male	Thai Bangkaew	Bangkok	<10	<10
811	Dog	2020-07-31	7 Y 10 M 30 D	Female	Thai	Nakhon Pathom	<10	<10
812	Dog	2020-07-31	8 Y 3 M 30 D	Female	Chihuahua	Bangkok	<10	<10
813	Dog	2020-07-31	11 Y 5 M 30 D	Male	Chihuahua	Nakhon Pathom	<10	<10
814	Dog	2020-07-31	10 Y 0 M 30 D	Male	Thai	Nonthaburi	<10	<10
815	Dog	2020-07-31	10 Y 8 M 30 D	Female	Siberian Husky	Bangkok	<10	<10
816	Dog	2020-07-31	9 Y 8 M 30 D	Female	Thai	Nakhon Pathom	<10	<10
817	Dog	2020-07-31	13 Y 1 M 30 D	Male	Shih Tzu	Bangkok	<10	<10
818	Dog	2020-07-31	13 Y 4 M 30 D	Female	Shih Tzu	Bangkok	<10	<10
819	Cat	2020-07-31	3 Y 0 M 30 D	Female	Thai	Bangkok	<10	<10
820	Cat	2020-07-31	6 Y 6 M 30 D	Male	Persian	Bangkok	<10	<10
821	Cat	2020-07-31	1 Y 2 M 9 D	Female	Mixed Breed	Nonthaburi	<10	<10
822	Cat	2020-07-31	0 Y 0 M 6 D	Male	Thai	Bangkok	<10	<10
823	Cat	2020-07-31	0 Y 4 M 5 D	Male	Thai	Bangkok	<10	<10
824	Cat	2020-07-31	2 Y 0 M 30 D	Male	Thai	Bangkok	<10	<10
825	Cat	2020-07-31	4 Y 0 M 30 D	Male	Thai	Bangkok	<10	<10
826	Cat	2020-07-31	13 Y 0 M 30 D	Female	Thai	Nakhon Pathom	<10	<10
827	Cat	2020-07-31	0 Y 0 M 30 D	Female	Thai	Samut Sakhon	<10	<10
828	Cat	2020-07-31	15 Y 6 M 19 D	Male	Persian	Samut Sakhon	<10	<10
829	Cat	2020-07-31	7 Y 8 M 30 D	Male	Persian	Bangkok	<10	<10
830	Cat	2020-07-31	6 Y 0 M 30 D	Male	Persian	Samut Sakhon	<10	<10
831	Cat	2020-07-31	1 Y 6 M 30 D	Male	Thai	Nakhon Pathom	<10	<10
832	Cat	2020-07-31	5 Y 0 M 30 D	Male	Thai	Bangkok	<10	<10
833	Cat	2020-07-31	0 Y 7 M 30 D	Male	Thai	Samut Sakhon	<10	<10
834	Dog	2020-07-31	6 Y 1 M 7 D	Female	Beagle	Nonthaburi	<10	<10
835	Cat	2020-07-31	2 Y 0 M 30 D	Female	Siamese	Bangkok	<10	<10
836	Cat	2020-07-31	0 Y 1 M 28 D	Female	Thai	Nakhon Pathom	<10	<10
837	Cat	2020-07-31	0 Y 0 M 6 D	Male	Thai	Bangkok	<10	<10
838	Cat	2020-08-03	3 Y 6 M 2 D	Male	Scottish Fold	Samut Sakhon	<10	<10
839	Cat	2020-08-03	1 Y 1 M 20 D	Male	Scottish Fold	Bangkok	<10	<10
840	Cat	2020-08-03	2 Y 1 M 2 D	Male	Domestic Shorthair (DSH)	Nonthaburi	<10	<10
841	Cat	2020-08-03	11 Y 4 M 6 D	Male	Thai	Bangkok	<10	<10
842	Cat	2020-08-03	1 Y 7 M 2 D	Female	Persian	Bangkok	<10	<10
843	Cat	2020-08-03	1 Y 1 M 2 D	Male	Thai	Nakhon Pathom	<10	<10
844	Cat	2020-08-03	6 Y 1 M 2 D	Male	Thai	Bangkok	<10	<10
845	Cat	2020-08-03	18 Y 8 M 2 D	Female	Siamese	Nakhon Pathom	<10	<10
846	Cat	2020-08-03	0 Y 0 M 12 D	Male	Thai	Nakhon Pathom	<10	<10
847	Cat	2020-08-03	6 Y 1 M 2 D	Male	Persian	Samut Sakhon	<10	<10
848	Cat	2020-08-03	2 Y 3 M 2 D	Male	Persian	Bangkok	<10	<10
849	Cat	2020-08-03	10 Y 2 M 2 D	Female	Thai	Bangkok	<10	<10
850	Cat	2020-08-03	1 Y 9 M 2 D	Male	Thai	Bangkok	<10	<10
851	Cat	2020-08-03	2 Y 1 M 2 D	Male	Thai	Bangkok	<10	<10
852	Cat	2020-08-03	4 Y 10 M 26 D	Female	American Shorthair Mix	Bangkok	<10	<10
853	Cat	2020-08-03	2 Y 4 M 11 D	Female	Scottish Fold	Bangkok	<10	<10
854	Cat	2020-08-03	2 Y 7 M 13 D	Female	Siamese	Bangkok	<10	<10
855	Cat	2020-08-03	2 Y 1 M 2 D	Female	Thai	Nonthaburi	<10	<10
856	Cat	2020-08-03	1 Y 0 M 20 D	Female	Thai	Bangkok	<10	<10
857	Cat	2020-08-03	13 Y 4 M 2 D	Female	Thai	Bangkok	<10	<10
858	Cat	2020-08-03	13 Y 1 M 2 D	Male	Siamese	Bangkok	<10	<10
859	Cat	2020-08-03	2 Y 5 M 20 D	Male	Thai	Nonthaburi	<10	<10
860	Cat	2020-08-03	4 Y 1 M 2 D	Male	Thai	Bangkok	<10	<10
861	Cat	2020-08-03	2 Y 7 M 2 D	Female	Thai	Bangkok	<10	<10
862	Cat	2020-08-03	0 Y 0 M 19 D	Female	Mixed Breed	Bangkok	<10	<10
863	Cat	2020-08-03	0 Y 3 M 4 D	Female	Munchkin	Bangkok	<10	<10
864	Cat	2020-08-03	3 Y 10 M 2 D	Male	Siamese	Bangkok	<10	<10
865	Cat	2020-08-03	3 Y 1 M 2 D	Male	Thai	Bangkok	<10	<10
866	Cat	2020-08-03	0 Y 4 M 2 D	Male	Thai	Bangkok	<10	<10
867	Cat	2020-08-03	0 Y 0 M 5 D	Male	Thai	Samut Sakhon	<10	<10
868	Cat	2020-08-03	2 Y 1 M 2 D	Male	Thai	Nonthaburi	<10	<10
869	Cat	2020-08-03	0 Y 3 M 4 D	Male	Munchkin	Bangkok	<10	<10
870	Dog	2020-08-03	14 Y 1 M 2 D	Female	Poodle	Nakhon Pathom	<10	<10
871	Dog	2020-08-03	5 Y 2 M 2 D	Male	German Shepherd	Bangkok	<10	<10
872	Dog	2020-08-03	7 Y 2 M 2 D	Male	Thai	Nonthaburi	<10	<10
873	Dog	2020-08-03	11 Y 8 M 0 D	Male	Thai Bangkaew	Bangkok	<10	<10
874	Dog	2020-08-03	8 Y 3 M 21 D	Female	Poodle	Samut Sakhon	<10	<10
875	Dog	2020-08-03	10 Y 1 M 2 D	Male	Labrador Retriever	Bangkok	<10	<10
876	Dog	2020-08-03	8 Y 7 M 2 D	Female	Yorkshire Terrier	Bangkok	<10	<10
877	Dog	2020-08-03	8 Y 7 M 9 D	Male	Jack Russell Terrier	Bangkok	<10	<10
878	Dog	2020-08-03	10 Y 8 M 28 D	Female	Thai	Nonthaburi	<10	<10
879	Dog	2020-08-07	11 Y 0 M 6 D	Female	Chihuahua	Bangkok	<10	<10
880	Dog	2020-08-07	15 Y 1 M 6 D	Male	Mixed Breed	Nakhon Pathom	<10	<10
881	Dog	2020-08-07	15 Y 0 M 6 D	Female	Shih Tzu	Bangkok	<10	<10
882	Dog	2020-08-07	6 Y 0 M 6 D	Male	Poodle	Samut Sakhon	<10	<10
883	Dog	2020-08-07	11 Y 2 M 6 D	Female	Poodle	Nakhon Pathom	<10	<10
884	Dog	2020-08-07	15 Y 0 M 5 D	Female	Poodle	Nonthaburi	<10	<10
885	Dog	2020-08-07	10 Y 2 M 6 D	Male	Beagle	Nonthaburi	<10	<10
886	Dog	2020-08-07	8 Y 8 M 14 D	Male	Siberian Husky	Nonthaburi	<10	<10
887	Dog	2020-08-07	8 Y 1 M 22 D	Female	Mixed Breed	Bangkok	<10	<10
888	Dog	2020-08-07	0 Y 2 M 26 D	Male	Thai	Nakhon Pathom	<10	<10
889	Dog	2020-08-07	11 Y 3 M 6 D	Male	Thai	Samut Sakhon	<10	<10
890	Dog	2020-08-07	0 Y 10 M 24 D	Male	Chihuahua	Nonthaburi	<10	<10
891	Dog	2020-08-07	4 Y 0 M 6 D	Female	Thai	Nakhon Pathom	<10	<10
892	Dog	2020-08-07	15 Y 2 M 13 D	Female	Pomeranian	Bangkok	<10	<10
893	Dog	2020-08-07	7 Y 0 M 6 D	Male	Thai	Bangkok	<10	<10
894	Dog	2020-08-07	5 Y 2 M 6 D	Female	Thai	Nonthaburi	<10	<10
895	Dog	2020-08-07	9 Y 1 M 6 D	Female	Thai Bangkaew	Nakhon Pathom	<10	<10
896	Dog	2020-08-07	13 Y 3 M 6 D	Female	Pekingese	Nonthaburi	<10	<10
897	Dog	2020-08-07	8 Y 9 M 6 D	Male	Siberian Husky	Nakhon Pathom	<10	<10
898	Dog	2020-08-07	16 Y 1 M 6 D	Female	Shih Tzu	Bangkok	<10	<10
899	Dog	2020-08-07	0 Y 6 M 23 D	Female	Beagle	Nakhon Pathom	<10	<10
900	Dog	2020-08-07	3 Y 0 M 12 D	Male	Shih Tzu	Bangkok	<10	<10
901	Dog	2020-08-07	8 Y 1 M 6 D	Female	Mixed Breed	Bangkok	<10	<10
902	Dog	2020-08-07	12 Y 1 M 6 D	Female	Chihuahua	Nonthaburi	<10	<10
903	Dog	2020-08-07	9 Y 5 M 6 D	Female	Thai Mix	Nonthaburi	<10	<10
904	Dog	2020-08-07	0 Y 6 M 7 D	Male	Siberian Husky	Nakhon Pathom	<10	<10
905	Dog	2020-08-07	6 Y 0 M 6 D	Male	Pomeranian	Bangkok	<10	<10
906	Dog	2020-08-07	12 Y 3 M 25 D	Female	Poodle	Nonthaburi	<10	<10
907	Dog	2020-08-07	7 Y 0 M 6 D	Female	Thai	Bangkok	<10	<10
908	Cat	2020-08-07	3 Y 7 M 6 D	Male	Mixed Breed	Bangkok	<10	<10
909	Cat	2020-08-07	0 Y 7 M 6 D	Female	Thai	Bangkok	<10	<10
910	Cat	2020-08-07	5 Y 5 M 6 D	Male	Thai	Bangkok	<10	<10
911	Cat	2020-08-07	8 Y 0 M 6 D	Male	Thai	Nonthaburi	<10	<10
912	Cat	2020-08-07	1 Y 11 M 6 D	Female	Thai	Nakhon Pathom	<10	<10
913	Cat	2020-08-07	2 Y 2 M 25 D	Female	Burmese	Bangkok	<10	<10
914	Cat	2020-08-07	2 Y 1 M 6 D	Female	Siamese	Bangkok	<10	<10
915	Cat	2020-08-07	15 Y 2 M 6 D	Female	Siamese	Nonthaburi	<10	<10
916	Cat	2020-08-07	1 Y 6 M 6 D	Female	Thai	Bangkok	<10	<10
917	Cat	2020-08-07	8 Y 1 M 6 D	Female	Mixed Breed	Bangkok	<10	<10
918	Cat	2020-08-07	3 Y 6 M 6 D	Male	Thai	Nakhon Pathom	<10	<10
919	Cat	2020-08-07	5 Y 0 M 6 D	Male	Thai	Samut Sakhon	<10	<10
920	Cat	2020-08-07	13 Y 4 M 15 D	Male	N/A	Bangkok	<10	<10
921	Cat	2020-08-07	1 Y 2 M 6 D	Female	Persian	Nakhon Pathom	<10	<10
922	Cat	2020-08-07	6 Y 0 M 6 D	Male	Thai	Bangkok	<10	<10
923	Cat	2020-08-07	0 Y 3 M 6 D	Male	Thai	Bangkok	<10	<10
924	Cat	2020-08-07	0 Y 4 M 6 D	Male	Thai	Nonthaburi	<10	<10
925	Cat	2020-08-07	1 Y 5 M 10 D	Male	British Shorthair	Nonthaburi	<10	<10
926	Cat	2020-08-07	14 Y 6 M 6 D	Female	Thai	Nonthaburi	<10	<10
927	Cat	2020-08-07	10 Y 0 M 12 D	Female	Thai	Bangkok	<10	<10
928	Cat	2020-08-07	10 Y 0 M 6 D	Female	Thai	Bangkok	<10	<10
929	Cat	2020-08-07	10 Y 2 M 6 D	Female	Thai	Bangkok	<10	<10
930	Cat	2020-08-07	1 Y 3 M 8 D	Female	Mixed Breed	Nakhon Pathom	<10	<10
931	Cat	2020-08-07	2 Y 1 M 6 D	Male	Thai	Bangkok	<10	<10
932	Cat	2020-08-07	10 Y 9 M 6 D	Male	Persian Mix	Nonthaburi	<10	<10
933	Cat	2020-08-07	0 Y 0 M 23 D	Female	Mixed Breed	Bangkok	<10	<10
934	Cat	2020-08-07	6 Y 0 M 6 D	Female	Mixed Breed	Samut Sakhon	<10	<10
935	Cat	2020-08-07	1 Y 7 M 6 D	Male	Thai	Nakhon Pathom	<10	<10
936	Cat	2020-08-07	1 Y 4 M 20 D	Male	Thai	Bangkok	<10	<10
937	Cat	2020-08-07	0 Y 0 M 9 D	Male	Thai	Samut Sakhon	<10	<10
938	Dog	2020-08-11	12 Y 3 M 10 D	Male	Shih Tzu	Bangkok	<10	<10
939	Dog	2020-08-11	13 Y 0 M 8 D	Male	Golden Retriever	Bangkok	<10	<10
940	Dog	2020-08-11	14 Y 7 M 10 D	Female	Thai	Nonthaburi	<10	<10
941	Dog	2020-08-11	4 Y 1 M 10 D	Female	Thai	Samut Sakhon	<10	<10
942	Dog	2020-08-11	15 Y 1 M 10 D	Female	Mixed Breed	Nakhon Pathom	<10	<10
943	Dog	2020-08-11	1 Y 7 M 10 D	Male	Chihuahua	Nakhon Pathom	<10	<10
944	Cat	2020-08-11	10 Y 1 M 10 D	Male	Thai	Nonthaburi	<10	<10
945	Cat	2020-08-11	9 Y 0 M 8 D	Female	Persian	Bangkok	<10	<10
946	Dog	2020-08-11	0 Y 5 M 6 D	Male	French Bulldog	Bangkok	<10	<10
947	Dog	2020-08-11	12 Y 11 M 5 D	Female	Mixed Breed	Samut Sakhon	<10	<10
948	Dog	2020-08-11	6 Y 6 M 10 D	Male	Thai	Bangkok	<10	<10
949	Dog	2020-08-11	0 Y 5 M 22 D	Male	Thai	Nonthaburi	<10	<10
950	Dog	2020-08-11	0 Y 3 M 10 D	Female	Shih Tzu	Bangkok	<10	<10
951	Dog	2020-08-11	8 Y 0 M 10 D	Female	Thai	Bangkok	<10	<10
952	Dog	2020-08-11	4 Y 2 M 13 D	Female	Thai	Samut Sakhon	<10	<10
953	Dog	2020-08-11	10 Y 0 M 7 D	Male	Thai	Bangkok	<10	<10
954	Dog	2020-08-11	12 Y 1 M 10 D	Male	Thai Bangkaew	Bangkok	<10	<10
955	Dog	2020-08-11	10 Y 3 M 10 D	Male	Thai Bangkaew Mix	Samut Sakhon	<10	<10
956	Dog	2020-08-11	7 Y 8 M 7 D	Female	Pomeranian Mix	Samut Sakhon	<10	<10
957	Dog	2020-08-11	8 Y 11 M 10 D	Male	German Shepherd	Bangkok	<10	<10
958	Dog	2020-08-11	10 Y 0 M 10 D	Male	Thai	Nonthaburi	<10	<10
959	Dog	2020-08-11	8 Y 1 M 10 D	Female	Pomeranian	Bangkok	<10	<10
960	Dog	2020-08-11	1 Y 1 M 10 D	Male	Thai Ridgeback	Nakhon Pathom	<10	<10
961	Dog	2020-08-11	9 Y 5 M 26 D	Male	Beagle	Bangkok	<10	<10
962	Dog	2020-08-11	0 Y 0 M 10 D	Female	Thai Bangkaew	Bangkok	<10	<10
963	Dog	2020-08-11	10 Y 3 M 10 D	Female	Shih Tzu Mix	Nakhon Pathom	<10	<10
964	Dog	2020-08-11	12 Y 6 M 10 D	Male	Chihuahua	Nonthaburi	<10	<10
965	Dog	2020-08-11	10 Y 3 M 10 D	Male	Thai Bangkaew Mix	Samut Sakhon	<10	<10
966	Dog	2020-08-11	9 Y 9 M 10 D	Female	Thai	Nakhon Pathom	<10	<10
967	Dog	2020-08-11	13 Y 1 M 10 D	Female	Mixed Breed	Bangkok	<10	<10
968	Dog	2020-08-11	0 Y 6 M 10 D	Male	Thai	Samut Sakhon	<10	<10
969	Dog	2020-08-11	8 Y 7 M 6 D	Female	Labrador Retriever	Bangkok	<10	<10
970	Dog	2020-08-11	1 Y 3 M 21 D	Male	Terrier Mix	Bangkok	<10	<10
971	Dog	2020-08-11	3 Y 1 M 10 D	Male	Great Dane	Pathum Thani	<10	<10
972	Dog	2020-08-11	6 Y 0 M 10 D	Male	German Shepherd	Bangkok	<10	<10
973	Dog	2020-08-11	3 Y 5 M 10 D	Male	Mixed Breed	Nakhon Pathom	<10	<10
974	Dog	2020-08-11	11 Y 3 M 6 D	Male	Beagle	Bangkok	<10	<10
975	Cat	2020-08-11	15 Y 2 M 10 D	Female	Siamese	Nonthaburi	<10	<10
976	Cat	2020-08-11	0 Y 5 M 10 D	Female	Thai	Nakhon Pathom	<10	<10
977	Cat	2020-08-11	4 Y 10 M 10 D	Male	Persian	Bangkok	<10	<10
978	Cat	2020-08-11	17 Y 0 M 10 D	Female	Thai	Nonthaburi	<10	<10
979	Cat	2020-08-11	8 Y 4 M 9 D	Female	Siamese	Bangkok	<10	<10
980	Cat	2020-08-11	1 Y 11 M 10 D	Female	Thai	Nakhon Pathom	<10	<10
981	Cat	2020-08-11	1 Y 1 M 14 D	Male	Scottish Fold	Bangkok	<10	<10
982	Cat	2020-08-11	0 Y 5 M 0 D	Female	Thai	Nakhon Pathom	<10	<10
983	Cat	2020-08-11	9 Y 0 M 10 D	Male	Thai	Nakhon Pathom	<10	<10
984	Cat	2020-08-11	3 Y 6 M 10 D	Male	Thai	Nakhon Pathom	<10	<10
985	Cat	2020-08-11	0 Y 4 M 29 D	Male	Persian	Nonthaburi	<10	<10
986	Cat	2020-08-11	9 Y 10 M 10 D	Female	Siamese	Nonthaburi	<10	<10
987	Cat	2020-08-11	6 Y 3 M 5 D	Female	Mixed Breed	Nakhon Pathom	<10	<10
988	Cat	2020-08-11	4 Y 0 M 17 D	Male	Thai	Bangkok	<10	<10
989	Cat	2020-08-11	0 Y 7 M 6 D	Male	Thai	Bangkok	<10	<10
990	Cat	2020-08-11	2 Y 1 M 10 D	Female	Blue Point Siamese	Bangkok	<10	<10
991	Cat	2020-08-11	1 Y 6 M 10 D	Male	Scottish Fold	Nakhon Pathom	<10	<10
992	Cat	2020-08-11	7 Y 10 M 10 D	Female	Thai	Bangkok	<10	<10
993	Cat	2020-08-11	2 Y 2 M 14 D	Male	Thai	Bangkok	<10	<10
994	Cat	2020-08-11	16 Y 6 M 10 D	Female	Siamese	Bangkok	<10	<10
995	Cat	2020-08-11	0 Y 0 M 6 D	Female	Thai	Nonthaburi	<10	<10
996	Cat	2020-08-11	0 Y 4 M 21 D	Female	Thai	Bangkok	<10	<10
997	Cat	2020-08-11	4 Y 0 M 10 D	Male	Thai	Bangkok	<10	<10
998	Cat	2020-08-11	3 Y 3 M 10 D	Female	Thai	Bangkok	<10	<10
999	Cat	2020-08-11	8 Y 1 M 10 D	Female	Persian	Bangkok	<10	<10
1000	Cat	2020-08-11	15 Y 6 M 30 D	Male	Persian	Samut Sakhon	<10	<10
1001	Cat	2020-08-11	4 Y 2 M 6 D	Female	Mixed Breed	Nakhon Pathom	<10	<10
1002	Dog	2020-08-14	0 Y 1 M 5 D	Female	Thai	Samut Sakhon	<10	<10
1003	Dog	2020-08-14	1 Y 0 M 13 D	Male	Thai Bangkaew Mix	Samut Sakhon	<10	<10
1004	Dog	2020-08-14	3 Y 1 M 13 D	Male	French Bulldog	Nakhon Pathom	<10	<10
1005	Dog	2020-08-14	6 Y 11 M 13 D	Male	Saint Bernard	Nonthaburi	<10	<10
1006	Dog	2020-08-14	4 Y 2 M 16 D	Female	Thai	Samut Sakhon	<10	<10
1007	Dog	2020-08-14	12 Y 0 M 13 D	Female	Mixed Breed	Bangkok	<10	<10
1008	Dog	2020-08-14	5 Y 8 M 13 D	Female	Thai	Bangkok	<10	<10
1009	Dog	2020-08-14	14 Y 0 M 13 D	Male	Collie	Bangkok	<10	<10
1010	Dog	2020-08-14	9 Y 2 M 13 D	Female	Thai	Nonthaburi	<10	<10
1011	Dog	2020-08-14	1 Y 2 M 13 D	Male	Chihuahua	Nakhon Pathom	<10	<10
1012	Dog	2020-08-14	N/A	Male	Mixed Breed	Nonthaburi	<10	<10
1013	Dog	2020-08-14	13 Y 8 M 13 D	Female	Mixed Breed	Samut Prakan	<10	<10
1014	Dog	2020-08-14	11 Y 4 M 13 D	Male	Poodle	Bangkok	<10	<10
1015	Dog	2020-08-14	12 Y 9 M 13 D	Female	Thai	Nonthaburi	<10	<10
1016	Dog	2020-08-14	2 Y 0 M 13 D	Male	Thai	Bangkok	<10	<10
1017	Dog	2020-08-14	10 Y 9 M 8 D	Female	Thai	Nonthaburi	<10	<10
1018	Dog	2020-08-14	9 Y 2 M 18 D	Male	Chihuahua	Samut Sakhon	<10	<10
1019	Dog	2020-08-14	16 Y 9 M 13 D	Female	Poodle	Bangkok	<10	<10
1020	Dog	2020-08-14	12 Y 8 M 13 D	Male	Pomeranian	Bangkok	<10	<10
1021	Dog	2020-08-14	13 Y 5 M 13 D	Female	Mixed Breed	Nakhon Pathom	<10	<10
1022	Cat	2020-08-14	0 Y 0 M 23 D	Male	N/A	Bangkok	<10	<10
1023	Cat	2020-08-14	4 Y 0 M 13 D	Female	Thai	Nakhon Pathom	<10	<10
1024	Cat	2020-08-14	0 Y 4 M 20 D	Male	Thai	Bangkok	<10	<10
1025	Cat	2020-08-14	14 Y 0 M 13 D	Female	Thai	Samut Sakhon	<10	<10
1026	Cat	2020-08-14	4 Y 8 M 7 D	Female	Thai	Nakhon Pathom	<10	<10
1027	Cat	2020-08-14	12 Y 2 M 13 D	Female	Siamese	Bangkok	<10	<10
1028	Cat	2020-08-14	2 Y 7 M 13 D	Female	Thai	Bangkok	<10	<10
1029	Cat	2020-08-14	0 Y 3 M 13 D	Female	Thai	Bangkok	<10	<10
1030	Cat	2020-08-14	2 Y 6 M 0 D	Male	Thai	Nonthaburi	<10	<10
1031	Cat	2020-08-14	5 Y 4 M 13 D	Male	Siamese	Nakhon Pathom	<10	<10
1032	Cat	2020-08-14	4 Y 4 M 13 D	Male	Thai	Nakhon Pathom	<10	<10
1033	Cat	2020-08-14	3 Y 0 M 13 D	Male	Thai	Bangkok	<10	<10
1034	Cat	2020-08-14	4 Y 6 M 13 D	Male	Siamese	Bangkok	<10	<10
1035	Cat	2020-08-14	13 Y 7 M 13 D	Male	Persian	Samut Prakan	<10	<10
1036	Cat	2020-08-14	2 Y 1 M 13 D	Male	Thai	Bangkok	<10	<10
1037	Cat	2020-08-14	9 Y 0 M 13 D	Female	Siamese	Bangkok	<10	<10
1038	Dog	2020-08-14	11 Y 9 M 13 D	Male	Thai	Bangkok	<10	<10
1039	Cat	2020-08-14	20 Y 0 M 13 D	Female	Thai	Nakhon Pathom	<10	<10
1040	Cat	2020-08-14	0 Y 8 M 13 D	Male	Thai	Bangkok	<10	<10
1041	Cat	2020-08-14	13 Y 9 M 17 D	Male	Thai	Bangkok	<10	<10
1042	Cat	2020-08-14	10 Y 2 M 13 D	Female	Thai	Bangkok	<10	<10
1043	Cat	2020-08-14	5 Y 3 M 13 D	Male	Persian	Bangkok	<10	<10
1044	Cat	2020-08-14	0 Y 3 M 13 D	Male	Thai	Bangkok	<10	<10
1045	Cat	2020-08-14	0 Y 8 M 20 D	Female	Thai	Nakhon Pathom	<10	<10
1046	Cat	2020-08-14	2 Y 0 M 13 D	Female	Thai	Nakhon Pathom	<10	<10
1047	Cat	2020-08-14	11 Y 3 M 19 D	Female	Siamese	Samut Sakhon	<10	<10
1048	Cat	2020-08-14	4 Y 0 M 23 D	Female	Persian	Samut Sakhon	<10	<10
1049	Cat	2020-08-14	0 Y 10 M 17 D	Male	Thai	Bangkok	<10	<10
1050	Cat	2020-08-14	3 Y 6 M 13 D	Male	Persian	Nonthaburi	<10	<10
1051	Cat	2020-08-14	4 Y 0 M 13 D	Male	Persian	Nonthaburi	<10	<10
1052	Cat	2020-08-18	1 Y 1 M 4 D	Female	Thai	Bangkok	<10	<10
1053	Cat	2020-08-18	8 Y 0 M 17 D	Male	Siamese	Samut Sakhon	<10	<10
1054	Cat	2020-08-18	6 Y 1 M 17 D	Male	Persian	Samut Sakhon	<10	<10
1055	Cat	2020-08-18	3 Y 6 M 17 D	Male	Thai	Bangkok	<10	<10
1056	Cat	2020-08-18	1 Y 0 M 17 D	Female	Thai	Nakhon Pathom	<10	<10
1057	Cat	2020-08-18	3 Y 6 M 17 D	Male	Persian	Nonthaburi	<10	<10
1058	Cat	2020-08-18	0 Y 9 M 17 D	Male	Thai	Nakhon Pathom	<10	<10
1059	Cat	2020-08-18	12 Y 6 M 17 D	Female	Siamese	Nakhon Pathom	<10	<10
1060	Cat	2020-08-18	0 Y 2 M 17 D	Male	Thai	Bangkok	<10	<10
1061	Cat	2020-08-18	0 Y 5 M 17 D	Female	Munchkin	Bangkok	<10	<10
1062	Cat	2020-08-18	0 Y 8 M 17 D	Male	Thai	Bangkok	<10	<10
1063	Cat	2020-08-18	1 Y 7 M 17 D	Female	Thai	Nakhon Pathom	<10	<10
1064	Cat	2020-08-18	2 Y 2 M 13 D	Female	Scottish Fold	Nonthaburi	<10	<10
1065	Cat	2020-08-18	15 Y 7 M 6 D	Male	Persian	Samut Sakhon	<10	<10
1066	Cat	2020-08-18	8 Y 0 M 17 D	Male	Thai	Bangkok	<10	<10
1067	Cat	2020-08-18	1 Y 6 M 17 D	Male	Thai	Bangkok	<10	<10
1068	Cat	2020-08-18	0 Y 8 M 17 D	Male	Thai	Bangkok	<10	<10
1069	Cat	2020-08-18	1 Y 11 M 17 D	Female	Thai	Nakhon Pathom	<10	<10
1070	Cat	2020-08-18	15 Y 1 M 3 D	Male	Persian	Nakhon Pathom	<10	<10
1071	Cat	2020-08-18	12 Y 2 M 17 D	Female	Siamese	Bangkok	<10	<10
1072	Cat	2020-08-18	20 Y 0 M 17 D	Female	Thai	Nakhon Pathom	<10	<10
1073	Cat	2020-08-18	2 Y 1 M 12 D	Female	Thai	Nakhon Pathom	<10	<10
1074	Cat	2020-08-18	0 Y 2 M 19 D	Male	Thai	Nakhon Pathom	<10	<10
1075	Cat	2020-08-18	1 Y 1 M 21 D	Male	Scottish Fold	Bangkok	<10	<10
1076	Cat	2020-08-18	10 Y 10 M 17 D	Female	Thai	Bangkok	<10	<10
1077	Cat	2020-08-18	13 Y 1 M 21 D	Female	Thai	Nonthaburi	<10	<10
1078	Cat	2020-08-18	1 Y 0 M 4 D	Male	Thai	Samut Sakhon	<10	<10
1079	Cat	2020-08-18	4 Y 0 M 17 D	Male	Thai	Nakhon Pathom	<10	<10
1080	Cat	2020-08-18	6 Y 0 M 17 D	Female	Thai	Bangkok	<10	<10
1081	Cat	2020-08-18	7 Y 0 M 17 D	Male	Thai	Nonthaburi	<10	<10
1082	Cat	2020-08-18	0 Y 4 M 22 D	Male	Thai	Bangkok	<10	<10
1083	Cat	2020-08-18	0 Y 0 M 7 D	Female	Thai	Bangkok	<10	<10
1084	Cat	2020-08-18	N/A	N/A	N/A	Bangkok	<10	<10
1085	Cat	2020-08-18	4 Y 8 M 6 D	Female	Persian	Nonthaburi	<10	<10
1086	Cat	2020-08-18	0 Y 1 M 17 D	Male	American Shorthair	Bangkok	<10	<10
1087	Cat	2020-08-18	0 Y 0 M 8 D	Male	Thai	Nakhon Pathom	<10	<10
1088	Cat	2020-08-21	6 Y 0 M 20 D	Female	Persian	Samut Prakan	<10	<10
1089	Cat	2020-08-21	6 Y 4 M 15 D	Male	Mixed Breed	Nakhon Pathom	<10	<10
1090	Cat	2020-08-21	1 Y 7 M 20 D	Male	Thai	Nakhon Pathom	<10	<10
1091	Cat	2020-08-21	1 Y 0 M 5 D	Male	Thai	Bangkok	<10	<10
1092	Cat	2020-08-21	0 Y 1 M 16 D	Female	British Shorthair	Bangkok	<10	<10
1093	Cat	2020-08-21	4 Y 1 M 20 D	Female	Siamese	Bangkok	<10	<10
1094	Cat	2020-08-21	0 Y 10 M 23 D	Male	Thai	Nonthaburi	<10	<10
1095	Cat	2020-08-21	2 Y 3 M 20 D	Male	Thai	Bangkok	<10	<10
1096	Cat	2020-08-21	6 Y 4 M 15 D	Male	Mixed Breed	Nakhon Pathom	<10	<10
1097	Cat	2020-08-21	0 Y 3 M 3 D	Female	Thai	Nakhon Pathom	<10	<10
1098	Cat	2020-08-21	0 Y 11 M 16 D	Male	Thai	Bangkok	<10	<10
1099	Cat	2020-08-21	10 Y 0 M 20 D	Female	Thai	Nakhon Pathom	<10	<10
1100	Dog	2020-08-21	12 Y 0 M 20 D	Female	Mixed Breed	Bangkok	<10	<10
1101	Dog	2020-08-21	7 Y 11 M 20 D	Female	Thai	Samut Sakhon	<10	<10
1102	Cat	2020-08-21	1 Y 2 M 20 D	Female	Thai	Nonthaburi	<10	<10
1103	Cat	2020-08-21	1 Y 6 M 20 D	Female	Thai	Nonthaburi	<10	<10
1104	Cat	2020-08-21	1 Y 0 M 20 D	Female	Thai	Nakhon Pathom	<10	<10
1105	Cat	2020-08-21	5 Y 7 M 20 D	Female	Siamese	Bangkok	<10	<10
1106	Cat	2020-08-21	10 Y 0 M 20 D	Female	Thai	Bangkok	<10	<10
1107	Dog	2020-08-21	13 Y 4 M 20 D	Male	Shih Tzu Mix	Nakhon Pathom	<10	<10
1108	Dog	2020-08-21	2 Y 11 M 10 D	Male	Beagle	Bangkok	<10	<10
1109	Dog	2020-08-21	8 Y 0 M 20 D	Male	Thai	Nonthaburi	<10	<10
1110	Dog	2020-08-21	3 Y 10 M 0 D	Male	American Pit Bull Terrier	Samut Prakan	<10	<10
1111	Dog	2020-08-21	5 Y 4 M 12 D	Female	Mixed Breed	Bangkok	<10	<10
1112	Dog	2020-08-21	7 Y 0 M 20 D	Female	Shih Tzu	Bangkok	<10	<10
1113	Dog	2020-08-21	7 Y 11 M 9 D	Female	Thai	Nonthaburi	<10	<10
1114	Dog	2020-08-21	10 Y 0 M 20 D	Male	Mixed Breed	Nonthaburi	<10	<10
1115	Dog	2020-08-21	1 Y 4 M 5 D	Male	Shih Tzu	Nakhon Pathom	<10	<10
1116	Dog	2020-08-21	13 Y 4 M 20 D	Male	Pomeranian	Bangkok	<10	<10
1117	Dog	2020-08-21	5 Y 2 M 20 D	Female	Thai	Bangkok	<10	<10
1118	Dog	2020-08-21	11 Y 5 M 20 D	Female	Yorkshire Terrier	Nakhon Pathom	<10	<10
1119	Dog	2020-08-21	10 Y 7 M 20 D	Female	Mixed Breed	Nakhon Pathom	<10	<10
1120	Dog	2020-08-21	14 Y 5 M 20 D	Male	Shih Tzu Mix	Bangkok	<10	<10
1121	Dog	2020-08-21	10 Y 0 M 20 D	Female	Thai	Bangkok	<10	<10
1122	Cat	2020-08-21	3 Y 6 M 20 D	Male	Persian	Nonthaburi	<10	<10
1123	Cat	2020-08-28	1 Y 0 M 27 D	Male	Persian	Bangkok	<10	<10
1124	Cat	2020-08-28	4 Y 11 M 27 D	Male	Thai	Bangkok	<10	<10
1125	Cat	2020-08-28	0 Y 3 M 27 D	Male	Thai	Bangkok	<10	<10
1126	Cat	2020-08-28	12 Y 11 M 27 D	Male	Siamese	Pathum Thani	<10	<10
1127	Cat	2020-08-28	0 Y 3 M 27 D	Male	Mixed Breed	Nakhon Pathom	<10	<10
1128	Cat	2020-08-28	0 Y 5 M 27 D	Female	Munchkin	Bangkok	<10	<10
1129	Cat	2020-08-28	9 Y 0 M 27 D	Female	Thai	Bangkok	<10	<10
1130	Cat	2020-08-28	11 Y 10 M 4 D	Male	Persian	Nakhon Pathom	<10	<10
1131	Cat	2020-08-28	1 Y 3 M 4 D	Male	Persian	Nonthaburi	<10	<10
1132	Cat	2020-08-28	2 Y 3 M 27 D	Male	Persian	Bangkok	<10	<10
1133	Cat	2020-08-28	0 Y 4 M 27 D	Male	Siamese	Nonthaburi	<10	<10
1134	Cat	2020-08-28	6 Y 0 M 27 D	Male	Thai	Bangkok	<10	<10
1135	Cat	2020-08-28	13 Y 0 M 27 D	Male	Mixed Breed	Bangkok	<10	<10
1136	Cat	2020-08-28	11 Y 3 M 27 D	Male	Persian	Bangkok	<10	<10
1137	Cat	2020-08-28	5 Y 10 M 13 D	Male	Thai	Bangkok	<10	<10
1138	Cat	2020-08-28	8 Y 0 M 27 D	Male	Thai	Bangkok	<10	<10
1139	Cat	2020-08-28	1 Y 0 M 27 D	Male	Thai	Nakhon Pathom	<10	<10
1140	Cat	2020-08-28	0 Y 6 M 27 D	Female	Thai	Nakhon Pathom	<10	<10
1141	Cat	2020-08-28	0 Y 0 M 13 D	Male	Thai	Samut Sakhon	<10	<10
1142	Cat	2020-08-28	1 Y 1 M 14 D	Female	Thai	Bangkok	<10	<10
1143	Cat	2020-08-28	1 Y 2 M 0 D	Male	Scottish Fold	Bangkok	<10	<10
1144	Cat	2020-08-28	1 Y 11 M 27 D	Female	Thai	Nakhon Pathom	<10	<10
1145	Cat	2020-08-28	1 Y 3 M 6 D	Female	Mixed Breed	Nonthaburi	<10	<10
1146	Cat	2020-08-28	17 Y 0 M 27 D	Female	Persian Mix	Nakhon Pathom	<10	<10
1147	Cat	2020-08-28	1 Y 3 M 8 D	Male	Scottish Fold Mix	Bangkok	<10	<10
1148	Cat	2020-08-28	0 Y 8 M 27 D	Female	Thai	Nakhon Pathom	<10	<10
1149	Cat	2020-08-28	3 Y 1 M 27 D	Male	Thai	Bangkok	<10	<10
1150	Cat	2020-08-28	1 Y 1 M 26 D	Female	Thai	Nakhon Pathom	<10	<10
1151	Cat	2020-08-28	0 Y 7 M 22 D	Female	Thai	Nakhon Pathom	<10	<10
1152	Cat	2020-08-28	0 Y 0 M 19 D	Female	Thai	Suphan Buri	<10	<10
1153	Cat	2020-08-28	2 Y 6 M 19 D	Male	Siamese	Bangkok	<10	<10
1154	Cat	2020-08-28	14 Y 0 M 27 D	Female	Thai	Bangkok	<10	<10
1155	Cat	2020-08-28	15 Y 7 M 16 D	Male	Persian	Samut Sakhon	<10	<10
1156	Cat	2020-08-28	12 Y 5 M 27 D	Female	Persian Mix	Nonthaburi	<10	<10
1157	Cat	2020-08-28	3 Y 6 M 27 D	Male	Persian	Bangkok	<10	<10
1158	Cat	2020-08-28	3 Y 0 M 27 D	Female	Persian	Nakhon Pathom	<10	<10
1159	Cat	2020-08-28	2 Y 0 M 27 D	Female	Persian	Nonthaburi	<10	<10
1160	Cat	2020-08-28	16 Y 3 M 25 D	Male	Blue Point Siamese	Bangkok	<10	<10
1161	Cat	2020-08-28	9 Y 0 M 27 D	Male	Thai	Bangkok	<10	<10
1162	Cat	2020-08-28	2 Y 1 M 27 D	Male	Domestic Shorthair (DSH)	Nonthaburi	<10	<10
1163	Cat	2020-08-28	4 Y 0 M 27 D	Female	Thai	Bangkok	<10	<10
1164	Cat	2020-08-28	2 Y 1 M 27 D	Female	Siamese	Bangkok	<10	<10
1165	Cat	2020-08-28	0 Y 11 M 3 D	Female	Thai	Ratchaburi	<10	<10
1166	Cat	2020-08-28	1 Y 6 M 27 D	Female	Thai	Nonthaburi	<10	<10
1167	Cat	2020-08-28	3 Y 0 M 27 D	Female	Thai	Bangkok	<10	<10
1168	Cat	2020-08-28	15 Y 1 M 13 D	Male	Persian	Nakhon Pathom	<10	<10
1169	Cat	2020-08-28	11 Y 4 M 2 D	Female	Siamese	Samut Sakhon	<10	<10
1170	Cat	2020-08-28	0 Y 6 M 27 D	Female	Thai	Nakhon Pathom	<10	<10
1171	Cat	2020-08-28	6 Y 4 M 24 D	Female	Thai	Nakhon Pathom	<10	<10
1172	Cat	2020-08-28	12 Y 6 M 27 D	Female	Siamese	Nakhon Pathom	<10	<10
1173	Cat	2020-08-28	7 Y 0 M 27 D	Female	Siamese	Bangkok	<10	<10
1174	Cat	2020-08-28	5 Y 0 M 27 D	Female	Siamese	Nonthaburi	<10	<10
1175	Cat	2020-08-28	15 Y 4 M 15 D	Male	Thai	Nonthaburi	<10	<10
1176	Cat	2020-08-28	3 Y 0 M 27 D	Female	Thai	Nakhon Pathom	<10	<10
1177	Dog	2020-08-28	2 Y 7 M 23 D	Male	Pomeranian	Bangkok	<10	<10
1178	Dog	2020-08-28	3 Y 6 M 27 D	Male	Siberian Husky	Bangkok	<10	<10
1179	Dog	2020-08-28	13 Y 6 M 27 D	Male	Poodle	Nakhon Pathom	<10	<10
1180	Dog	2020-08-28	10 Y 3 M 27 D	Male	Poodle	Nonthaburi	<10	<10
1181	Dog	2020-08-28	17 Y 1 M 7 D	Male	Poodle	Bangkok	<10	<10
1182	Dog	2020-08-28	5 Y 2 M 27 D	Female	Thai	Bangkok	<10	<10
1183	Dog	2020-08-28	10 Y 0 M 17 D	Male	Beagle	Nakhon Pathom	<10	<10
1184	Dog	2020-08-28	11 Y 0 M 5 D	Male	Mixed Breed	Nonthaburi	<10	<10
1185	Dog	2020-08-28	8 Y 5 M 8 D	Female	Chihuahua	Samut Sakhon	<10	<10
1186	Dog	2020-08-28	0 Y 1 M 19 D	Female	Thai	Samut Sakhon	<10	<10
1187	Dog	2020-10-16	15 Y 9 M 15 D	Male	Shih Tzu	Nakhon Pathom	<10	<10
1188	Dog	2020-10-16	0 Y 3 M 4 D	Female	Thai	Nonthaburi	<10	<10
1189	Dog	2020-10-16	20 Y 5 M 15 D	Male	Dachshund	Nakhon Pathom	<10	<10
1190	Dog	2020-10-16	9 Y 1 M 15 D	Male	Mixed Breed	Samut Sakhon	<10	<10
1191	Dog	2020-10-16	13 Y 2 M 1 D	Female	Thai Bangkaew	Bangkok	<10	<10
1192	Dog	2020-10-16	9 Y 11 M 15 D	Female	Thai	Nakhon Pathom	<10	<10
1193	Dog	2020-10-16	13 Y 1 M 15 D	Female	Shih Tzu	Bangkok	<10	<10
1194	Dog	2020-10-16	8 Y 9 M 11 D	Female	Labrador Retriever	Bangkok	<10	<10
1195	Dog	2020-10-16	16 Y 8 M 15 D	Female	Poodle	Bangkok	<10	<10
1196	Dog	2020-10-16	10 Y 7 M 15 D	Male	Mixed Breed	Bangkok	<10	<10
1197	Dog	2020-10-16	12 Y 1 M 15 D	Male	Thai	Nakhon Pathom	<10	<10
1198	Dog	2020-10-16	11 Y 0 M 15 D	Male	Poodle	Bangkok	<10	<10
1199	Cat	2020-10-16	0 Y 0 M 4 D	Female	Thai	Nakhon Pathom	<10	<10
1200	Cat	2020-10-16	4 Y 0 M 4 D	Male	Thai	Nakhon Pathom	<10	<10
1201	Cat	2020-10-16	13 Y 1 M 15 D	Female	Thai	Bangkok	<10	<10
1202	Cat	2020-10-16	1 Y 0 M 15 D	Female	Thai	Bangkok	<10	<10
1203	Cat	2020-10-16	0 Y 3 M 28 D	Female	Thai	Nonthaburi	<10	<10
1204	Cat	2020-10-16	1 Y 1 M 15 D	Male	Siamese	Bangkok	<10	<10
1205	Dog	2020-10-29	7 Y 10 M 28 D	Male	Thai	Bangkok	<10	<10
1206	Dog	2020-10-29	10 Y 1 M 28 D	Male	Thai	Bangkok	<10	<10
1207	Dog	2020-10-29	12 Y 0 M 28 D	Female	Pomeranian Mix	Pathum Thani	<10	<10
1208	Dog	2020-10-29	14 Y 9 M 28 D	Female	Thai	Nonthaburi	<10	<10
1209	Dog	2020-10-29	12 Y 2 M 28 D	Male	Pomeranian	Samut Sakhon	<10	<10
1210	Dog	2020-10-29	2 Y 1 M 28 D	Female	Thai	Bangkok	<10	<10
1211	Dog	2020-10-29	12 Y 0 M 7 D	Female	Poodle	Bangkok	<10	<10
1212	Dog	2020-10-29	1 Y 2 M 28 D	Female	Thai	Bangkok	<10	<10
1213	Dog	2020-10-29	10 Y 0 M 28 D	Male	Thai Bangkaew	Nonthaburi	<10	<10
1214	Dog	2020-10-29	5 Y 0 M 28 D	Male	Golden Retriever	Bangkok	<10	<10
1215	Dog	2020-10-29	6 Y 3 M 28 D	Female	Mixed Breed	Bangkok	<10	<10
1216	Dog	2020-10-29	11 Y 3 M 28 D	Male	Shih Tzu	Nonthaburi	<10	<10
1217	Dog	2020-10-29	13 Y 0 M 28 D	Female	Shih Tzu Mix	Samut Prakan	<10	<10
1218	Dog	2020-10-29	10 Y 1 M 28 D	Female	Poodle	Bangkok	<10	<10
1219	Dog	2020-10-29	11 Y 10 M 22 D	Male	Siberian Husky	Bangkok	<10	<10
1220	Dog	2020-10-29	15 Y 4 M 28 D	Male	Mixed Breed	Nakhon Pathom	<10	<10
1221	Cat	2020-10-29	2 Y 0 M 28 D	Female	Thai	Nakhon Pathom	<10	<10
1222	Cat	2020-10-29	3 Y 1 M 28 D	Male	Thai	Bangkok	<10	<10
1223	Cat	2020-10-29	0 Y 8 M 28 D	Female	Thai	Nakhon Pathom	<10	<10
1224	Cat	2020-10-29	3 Y 0 M 28 D	Male	Thai	Nakhon Pathom	<10	<10
1225	Dog	2020-11-11	18 Y 3 M 10 D	Female	Poodle Mix	Bangkok	<10	<10
1226	Dog	2020-11-11	8 Y 7 M 10 D	Female	Shih Tzu	Bangkok	<10	<10
1227	Dog	2020-11-11	9 Y 2 M 10 D	Female	Rottweiler	Nakhon Pathom	<10	<10
1228	Dog	2020-11-11	12 Y 9 M 10 D	Female	Poodle	Nonthaburi	<10	<10
1229	Dog	2020-11-11	5 Y 2 M 18 D	Male	Chihuahua	Nonthaburi	<10	<10
1230	Dog	2020-11-11	5 Y 7 M 5 D	Female	Labrador Retriever	Bangkok	<10	<10
1231	Dog	2020-11-11	13 Y 4 M 10 D	Female	Pomeranian	Nonthaburi	<10	<10
1232	Dog	2020-11-11	1 Y 11 M 15 D	Male	Miniature Schnauzer	Bangkok	<10	<10
1233	Dog	2020-11-11	9 Y 11 M 10 D	Male	Chihuahua	Bangkok	<10	<10
1234	Dog	2020-11-11	10 Y 6 M 10 D	Female	Pug	Bangkok	<10	<10
1235	Dog	2020-11-11	15 Y 0 M 10 D	Female	Poodle	Nonthaburi	<10	<10
1236	Dog	2020-11-11	11 Y 6 M 10 D	Female	Shih Tzu	Nakhon Pathom	<10	<10
1237	Dog	2020-11-11	11 Y 2 M 10 D	Male	Mixed Breed	Bangkok	<10	<10
1238	Dog	2020-11-11	13 Y 8 M 10 D	Female	Shih Tzu	Bangkok	<10	<10
1239	Dog	2020-11-11	12 Y 6 M 10 D	Female	Pomeranian	Nakhon Pathom	<10	<10
1240	Cat	2020-11-11	1 Y 1 M 10 D	Male	Thai	Bangkok	<10	<10
1241	Cat	2020-11-11	16 Y 6 M 9 D	Female	Thai	Bangkok	<10	<10
1242	Cat	2020-11-11	10 Y 9 M 10 D	Female	Persian	Nakhon Pathom	<10	<10
1243	Cat	2020-11-26	10 Y 0 M 25 D	Female	Thai	Nakhon Pathom	<10	<10
1244	Cat	2020-11-26	13 Y 8 M 25 D	Female	Siamese	Nonthaburi	<10	<10
1245	Cat	2020-11-26	0 Y 5 M 25 D	Female	Thai	Nakhon Pathom	<10	<10
1246	Cat	2020-11-26	0 Y 0 M 10 D	Male	Thai	Samut Sakhon	<10	<10
1247	Cat	2020-11-26	0 Y 4 M 12 D	Female	Thai	Nakhon Pathom	<10	<10
1248	Cat	2020-11-26	0 Y 4 M 12 D	Male	Thai	Nakhon Pathom	<10	<10
1249	Dog	2020-11-26	3 Y 0 M 25 D	Male	Thai	Nakhon Pathom	<10	<10
1250	Dog	2020-11-26	13 Y 1 M 25 D	Female	Miniature Pinscher	Nakhon Pathom	<10	<10
1251	Dog	2020-11-26	5 Y 5 M 25 D	Male	Shih Tzu Mix	Bangkok	<10	<10
1252	Dog	2020-11-26	6 Y 8 M 25 D	Male	Mixed Breed	Nakhon Pathom	<10	<10
1253	Dog	2020-11-26	4 Y 0 M 25 D	Female	Thai	Nakhon Pathom	<10	<10
1254	Dog	2020-11-26	4 Y 7 M 25 D	Male	Thai	Bangkok	<10	<10
1255	Dog	2020-11-26	8 Y 1 M 25 D	Male	English Bulldog	Bangkok	<10	<10
1256	Dog	2020-11-26	16 Y 9 M 25 D	Female	Mixed Breed	Bangkok	<10	<10
1257	Dog	2020-11-26	10 Y 1 M 25 D	Female	Mixed Breed	Bangkok	<10	<10
1258	Dog	2020-11-26	10 Y 0 M 25 D	Female	Beagle	Nonthaburi	<10	<10
1259	Dog	2020-11-26	8 Y 1 M 25 D	Male	English Bulldog	Bangkok	<10	<10
1260	Dog	2020-11-26	5 Y 2 M 25 D	Female	Mixed Breed	Nakhon Pathom	<10	<10
1261	Dog	2020-11-26	3 Y 0 M 25 D	Female	Pomeranian	Nonthaburi	<10	<10
1262	Dog	2020-12-14	12 Y 9 M 13 D	Female	Shih Tzu Mix	Samut Sakhon	<10	<10
1263	Dog	2020-12-14	5 Y 0 M 10 D	Female	Thai	Samut Prakan	<10	<10
1264	Dog	2020-12-14	3 Y 10 M 13 D	Male	American Bully	Nakhon Pathom	<10	<10
1265	Dog	2020-12-14	1 Y 2 M 13 D	Female	Siberian Husky	Nakhon Pathom	<10	<10
1266	Dog	2020-12-14	15 Y 7 M 13 D	Male	Thai	Nakhon Pathom	<10	<10
1267	Dog	2020-12-14	6 Y 4 M 13 D	Male	Thai	Bangkok	<10	<10
1268	Dog	2020-12-14	16 Y 0 M 13 D	Male	Mixed Breed	Bangkok	<10	<10
1269	Dog	2020-12-14	10 Y 1 M 13 D	Female	Beagle	Nonthaburi	<10	<10
1270	Dog	2020-12-14	6 Y 0 M 13 D	Female	Thai	Nonthaburi	<10	<10
1271	Dog	2020-12-14	10 Y 6 M 13 D	Male	Golden Retriever	Nonthaburi	<10	<10
1272	Dog	2020-12-14	8 Y 5 M 13 D	Male	Siberian Husky	Bangkok	<10	<10
1273	Dog	2020-12-14	16 Y 1 M 13 D	Female	Miniature Pinscher Mix	Nonthaburi	<10	<10
1274	Dog	2020-12-14	6 Y 4 M 13 D	Male	Thai	Bangkok	<10	<10
1275	Dog	2020-12-14	7 Y 10 M 13 D	Male	Shih Tzu	Bangkok	<10	<10
1276	Cat	2020-12-14	2 Y 1 M 13 D	Female	Thai	Bangkok	<10	<10
1277	Cat	2020-12-14	0 Y 4 M 13 D	Female	Thai	Nakhon Pathom	<10	<10
1278	Cat	2020-12-14	0 Y 8 M 13 D	Male	Thai	Bangkok	<10	<10
1279	Cat	2020-12-14	1 Y 5 M 14 D	Male	Thai	Bangkok	<10	<10
1280	Cat	2020-12-14	6 Y 9 M 13 D	Female	Mixed Breed	Bangkok	<10	<10
1281	Dog	2021-01-05	2 Y 1 M 4 D	Female	Pomeranian	Nonthaburi	<10	<10
1282	Dog	2021-01-05	6 Y 11 M 4 D	Female	Chihuahua	Samut Sakhon	<10	<10
1283	Dog	2021-01-05	4 Y 11 M 4 D	Male	American Pit Bull Terrier	Bangkok	<10	<10
1284	Dog	2021-01-05	7 Y 3 M 4 D	Male	Pomeranian	Bangkok	<10	<10
1285	Dog	2021-01-05	13 Y 4 M 4 D	Female	American Cocker Spaniel	Bangkok	<10	<10
1286	Dog	2021-01-05	9 Y 1 M 4 D	Male	Labrador Retriever	Bangkok	<10	<10
1287	Dog	2021-01-05	8 Y 1 M 4 D	Male	Chihuahua	Bangkok	<10	<10
1288	Dog	2021-01-05	0 Y 3 M 14 D	Male	Thai	Bangkok	<10	<10
1289	Dog	2021-01-05	18 Y 1 M 4 D	Male	Thai	Nakhon Pathom	<10	<10
1290	Dog	2021-01-05	0 Y 8 M 21 D	Male	Thai Mix	Bangkok	<10	<10
1291	Dog	2021-01-05	15 Y 1 M 4 D	Female	Poodle	Nakhon Pathom	<10	<10
1292	Dog	2021-01-05	11 Y 1 M 4 D	Male	Poodle	Bangkok	<10	<10
1293	Dog	2021-01-05	0 Y 1 M 25 D	Female	Thai Bangkaew	Bangkok	<10	<10
1294	Dog	2021-01-05	3 Y 4 M 4 D	Male	Pomeranian	Nonthaburi	<10	<10
1295	Cat	2021-01-05	12 Y 5 M 10 D	Female	Domestic Shorthair (DSH)	Nakhon Pathom	<10	<10
1296	Cat	2021-01-05	2 Y 1 M 4 D	Female	Thai	Bangkok	<10	<10
1297	Cat	2021-01-05	2 Y 2 M 4 D	Female	Thai	Bangkok	<10	<10
1298	Cat	2021-01-05	8 Y 1 M 4 D	Female	Thai	Bangkok	<10	<10
1299	Dog	2021-01-12	8 Y 1 M 4 D	Male	Beagle Mix	Bangkok	<10	<10
1300	Dog	2021-01-12	12 Y 9 M 11 D	Male	Siberian Husky	Bangkok	<10	<10
1301	Dog	2021-01-12	12 Y 3 M 22 D	Female	Shih Tzu	Bangkok	<10	<10
1302	Dog	2021-01-12	13 Y 10 M 11 D	Female	Shih Tzu	Bangkok	<10	<10
1303	Dog	2021-01-12	11 Y 10 M 11 D	Male	Poodle	Samut Sakhon	<10	<10
1304	Dog	2021-01-12	8 Y 1 M 11 D	Male	Beagle	Nonthaburi	<10	<10
1305	Dog	2021-01-12	9 Y 2 M 11 D	Female	Mixed Breed	Bangkok	<10	<10
1306	Dog	2021-01-12	8 Y 0 M 11 D	Male	Thai	Bangkok	<10	<10
1307	Dog	2021-01-12	13 Y 0 M 11 D	Male	Golden Retriever	Nonthaburi	<10	<10
1308	Dog	2021-01-12	15 Y 8 M 11 D	Male	Thai	Nakhon Pathom	<10	<10
1309	Dog	2021-01-12	0 Y 5 M 24 D	Male	English Bulldog	Samut Sakhon	<10	<10
1310	Dog	2021-01-12	11 Y 1 M 11 D	Male	Pug	Bangkok	<10	<10
1311	Cat	2021-01-12	4 Y 5 M 11 D	Male	Siamese	Bangkok	<10	<10
1312	Cat	2021-01-12	6 Y 0 M 11 D	Male	Persian	Nonthaburi	<10	<10
1313	Cat	2021-01-12	6 Y 0 M 11 D	Male	Persian	Nonthaburi	<10	<10
1314	Cat	2021-01-12	10 Y 8 M 11 D	Female	Persian	Bangkok	<10	<10
1315	Cat	2021-01-12	6 Y 0 M 11 D	Female	Thai	Samut Prakan	<10	<10
1316	Cat	2021-01-18	1 Y 8 M 17 D	Male	Siamese	Nonthaburi	<10	<10
1317	Dog	2021-01-18	0 Y 2 M 13 D	Female	Thai Bangkaew Mix	Nakhon Pathom	<10	<10
1318	Dog	2021-01-18	15 Y 2 M 17 D	Female	Yorkshire Terrier	Nakhon Pathom	<10	<10
1319	Dog	2021-01-18	10 Y 0 M 17 D	Female	Mixed Breed	Nakhon Pathom	<10	<10
1320	Dog	2021-01-18	10 Y 5 M 7 D	Male	Beagle	Nakhon Pathom	<10	<10
1321	Dog	2021-01-18	1 Y 7 M 29 D	Male	Pomeranian	Bangkok	<10	<10
1322	Dog	2021-01-18	11 Y 11 M 4 D	Male	Thai Mix	Bangkok	<10	<10
1323	Dog	2021-01-18	1 Y 0 M 17 D	Male	Siberian Husky	Samut Sakhon	<10	<10
1324	Dog	2021-01-18	17 Y 0 M 17 D	Female	Thai	Nonthaburi	<10	<10
1325	Dog	2021-01-18	12 Y 4 M 17 D	Male	Chihuahua	Bangkok	<10	<10
1326	Dog	2021-01-18	1 Y 5 M 4 D	Male	Labrador Retriever	Bangkok	<10	<10
1327	Dog	2021-01-18	8 Y 0 M 8 D	Male	Siberian Husky	Bangkok	<10	<10
1328	Dog	2021-01-18	12 Y 1 M 17 D	Female	Thai	Nonthaburi	<10	<10
1329	Dog	2021-01-18	13 Y 4 M 17 D	Female	American Cocker Spaniel	Bangkok	<10	<10
1330	Dog	2021-01-18	5 Y 1 M 17 D	Male	Shih Tzu	Bangkok	<10	<10
1331	Dog	2021-01-18	11 Y 6 M 17 D	Male	Poodle	Bangkok	<10	<10
1332	Dog	2021-01-18	8 Y 7 M 17 D	Male	Poodle	Nonthaburi	<10	<10
1333	Dog	2021-01-18	0 Y 6 M 17 D	Male	Thai	Bangkok	<10	<10
1334	Dog	2021-01-18	12 Y 0 M 17 D	Female	Thai Mix	Bangkok	<10	<10
1335	Cat	2021-01-18	0 Y 10 M 8 D	Male	American Shorthair	Bangkok	<10	<10
1336	Cat	2021-01-18	11 Y 10 M 17 D	Female	Thai	Bangkok	<10	<10
1337	Cat	2021-01-18	1 Y 7 M 17 D	Female	Thai	Nonthaburi	<10	<10
1338	Cat	2021-01-18	1 Y 6 M 19 D	Male	Thai	Bangkok	<10	<10
1339	Cat	2021-01-18	1 Y 6 M 19 D	Female	Thai	Bangkok	<10	<10
1340	Cat	2021-01-18	0 Y 0 M 11 D	Female	Thai	Nonthaburi	<10	<10
1341	Dog	2021-01-18	14 Y 1 M 17 D	Female	Chihuahua	Nakhon Pathom	<10	<10
1342	Cat	2021-01-18	11 Y 2 M 17 D	Male	Persian Mix	Nonthaburi	<10	<10
1343	Dog	2021-01-18	5 Y 0 M 17 D	Female	Pomeranian Mix	Nonthaburi	<10	<10
1344	Dog	2021-01-19	1 Y 6 M 18 D	Male	Thai	Nakhon Pathom	<10	<10
1345	Dog	2021-01-19	N/A	Male	Thai	Bangkok	<10	<10
1346	Dog	2021-01-19	6 Y 9 M 18 D	Male	Poodle	Bangkok	<10	<10
1347	Dog	2021-01-19	7 Y 8 M 10 D	Male	Golden Retriever	Samut Sakhon	<10	<10
1348	Dog	2021-01-19	4 Y 10 M 29 D	Female	Thai	Nonthaburi	<10	<10
1349	Dog	2021-01-19	10 Y 0 M 18 D	Female	Mixed Breed	Bangkok	<10	<10
1350	Dog	2021-01-19	12 Y 0 M 18 D	Female	Thai	Bangkok	<10	<10
1351	Dog	2021-01-19	13 Y 0 M 10 D	Female	Beagle	Nakhon Pathom	<10	<10
1352	Dog	2021-01-19	1 Y 5 M 18 D	Female	Thai Bangkaew	Bangkok	<10	<10
1353	Dog	2021-01-19	2 Y 0 M 18 D	Male	Thai Mix	Bangkok	<10	<10
1354	Dog	2021-01-19	10 Y 0 M 18 D	Female	Shih Tzu	Bangkok	<10	<10
1355	Dog	2021-01-19	6 Y 0 M 18 D	Female	Thai	Nakhon Pathom	<10	<10
1356	Dog	2021-01-19	4 Y 0 M 18 D	Female	American Pit Bull Terrier	Ratchaburi	<10	<10
1357	Dog	2021-01-19	13 Y 1 M 5 D	Male	Mixed Breed	Samut Sakhon	<10	<10
1358	Dog	2021-01-19	0 Y 5 M 18 D	Male	Mixed Breed	Nakhon Pathom	<10	<10
1359	Dog	2021-01-19	15 Y 0 M 30 D	Female	Shih Tzu	Nakhon Pathom	<10	<10
1360	Cat	2021-01-19	1 Y 9 M 9 D	Female	Mixed Breed	Bangkok	<10	<10
1361	Cat	2021-01-19	0 Y 8 M 7 D	Female	Persian Mix	Bangkok	<10	<10
1362	Dog	2021-01-21	5 Y 10 M 20 D	Male	Pomeranian Mix	Nakhon Pathom	<10	<10
1363	Dog	2021-01-21	13 Y 9 M 4 D	Female	American Cocker Spaniel	Bangkok	<10	<10
1364	Dog	2021-01-21	8 Y 0 M 20 D	Male	Pomeranian	Bangkok	<10	<10
1365	Dog	2021-01-21	16 Y 4 M 1 D	Male	Pomeranian	Bangkok	<10	<10
1366	Dog	2021-01-21	12 Y 0 M 20 D	Male	Shih Tzu	Bangkok	<10	<10
1367	Dog	2021-01-21	5 Y 10 M 2 D	Female	Golden Retriever	Nakhon Pathom	<10	<10
1368	Dog	2021-01-21	13 Y 0 M 20 D	Male	Mixed Breed	Bangkok	<10	<10
1369	Dog	2021-01-21	11 Y 7 M 20 D	Male	Shih Tzu	Bangkok	<10	<10
1370	Dog	2021-01-21	13 Y 10 M 20 D	Female	Mixed Breed	Nakhon Pathom	<10	<10
1371	Dog	2021-01-21	5 Y 0 M 20 D	Male	Thai	Bangkok	<10	<10
1372	Dog	2021-01-21	6 Y 1 M 20 D	Female	Thai	Bangkok	<10	<10
1373	Dog	2021-01-21	10 Y 0 M 20 D	Male	Labrador Retriever	Bangkok	<10	<10
1374	Dog	2021-01-21	6 Y 2 M 20 D	Male	Thai	Nonthaburi	<10	<10
1375	Dog	2021-01-21	9 Y 10 M 20 D	Male	Shih Tzu	Nonthaburi	<10	<10
1376	Cat	2021-01-21	7 Y 0 M 20 D	Male	Thai	Bangkok	<10	<10
1377	Cat	2021-01-21	2 Y 10 M 6 D	Male	Exotic Shorthair	Samut Sakhon	<10	<10
1378	Cat	2021-01-21	9 Y 6 M 20 D	Male	Chinchilla	Nonthaburi	<10	<10
1379	Cat	2021-01-21	5 Y 7 M 20 D	Male	Persian Mix	Bangkok	<10	<10
1380	Cat	2021-01-21	6 Y 1 M 20 D	Male	Thai	Bangkok	<10	<10
1381	Dog	2021-01-25	9 Y 7 M 25 D	Male	Poodle	Bangkok	<10	<10
1382	Dog	2021-01-25	1 Y 5 M 24 D	Male	Samoyed	Bangkok	<10	<10
1383	Dog	2021-01-25	13 Y 1 M 24 D	Female	Yorkshire Terrier	Nonthaburi	<10	<10
1384	Dog	2021-01-25	10 Y 2 M 19 D	Male	Poodle	Samut Sakhon	<10	<10
1385	Dog	2021-01-25	1 Y 0 M 24 D	Male	Thai	Nakhon Pathom	<10	<10
1386	Dog	2021-01-25	14 Y 9 M 24 D	Female	Shih Tzu	Bangkok	<10	<10
1387	Dog	2021-01-25	11 Y 3 M 24 D	Male	German Shepherd Mix	Samut Sakhon	<10	<10
1388	Dog	2021-01-25	8 Y 11 M 11 D	Male	Beagle	Samut Prakan	<10	<10
1389	Dog	2021-01-25	6 Y 0 M 24 D	Male	Golden Retriever	Bangkok	<10	<10
1390	Dog	2021-01-25	5 Y 7 M 24 D	Female	Thai	Bangkok	<10	<10
1391	Dog	2021-01-25	3 Y 7 M 24 D	Female	Pomeranian	Nakhon Pathom	<10	<10
1392	Cat	2021-01-25	11 Y 0 M 24 D	Female	Siamese	Bangkok	<10	<10
1393	Cat	2021-01-25	6 Y 10 M 24 D	Female	Mixed Breed	Bangkok	<10	<10
1394	Cat	2021-01-25	0 Y 0 M 18 D	Female	Thai	Nonthaburi	<10	<10
1395	Cat	2021-01-25	7 Y 6 M 24 D	Female	Siamese	Nakhon Pathom	<10	<10
1396	Cat	2021-01-25	10 Y 0 M 24 D	Male	Thai	Bangkok	<10	<10
1397	Cat	2021-01-25	6 Y 2 M 24 D	Male	Thai	Nakhon Pathom	<10	<10
1398	Cat	2021-01-25	10 Y 7 M 24 D	Female	Thai	Bangkok	<10	<10
1399	Dog	2021-01-26	10 Y 6 M 25 D	Male	Poodle Mix	Bangkok	<10	<10
1400	Dog	2021-01-26	8 Y 4 M 25 D	Male	Thai Bangkaew	Bangkok	<10	<10
1401	Dog	2021-01-26	13 Y 11 M 25 D	Male	Poodle Mix	Bangkok	<10	<10
1402	Dog	2021-01-26	5 Y 0 M 25 D	Male	Shih Tzu	Nonthaburi	<10	<10
1403	Dog	2021-01-26	17 Y 0 M 19 D	Female	Shih Tzu	Nakhon Pathom	<10	<10
1404	Dog	2021-01-26	1 Y 6 M 28 D	Male	Siberian Husky	Nonthaburi	<10	<10
1405	Dog	2021-01-26	13 Y 6 M 25 D	Female	Labrador Retriever	Bangkok	<10	<10
1406	Dog	2021-01-26	N/A	Male	Mixed Breed	Nonthaburi	<10	<10
1407	Dog	2021-01-26	5 Y 1 M 25 D	Male	Mixed Breed	Nakhon Pathom	<10	<10
1408	Dog	2021-01-26	4 Y 3 M 25 D	Female	Mixed Breed	Nakhon Pathom	<10	<10
1409	Dog	2021-01-26	8 Y 3 M 25 D	Female	French Bulldog	Nakhon Pathom	<10	<10
1410	Dog	2021-01-26	0 Y 8 M 25 D	Male	Thai	Bangkok	<10	<10
1411	Dog	2021-01-26	11 Y 5 M 25 D	Female	Miniature Pinscher	Bangkok	<10	<10
1412	Dog	2021-01-26	7 Y 11 M 15 D	Male	Mixed Breed	Bangkok	<10	<10
1413	Dog	2021-01-26	10 Y 0 M 25 D	Male	Shih Tzu Mix	Bangkok	<10	<10
1414	Dog	2021-01-26	14 Y 2 M 25 D	Male	Thai	Bangkok	<10	<10
1415	Dog	2021-01-26	2 Y 4 M 7 D	Male	Siberian Husky	Ratchaburi	<10	<10
1416	Dog	2021-01-26	10 Y 1 M 5 D	Male	Mixed Breed	Bangkok	<10	<10
1417	Dog	2021-02-01	8 Y 1 M 0 D	Male	Spitz	Nonthaburi	<10	<10
1418	Dog	2021-02-01	6 Y 1 M 0 D	Female	Beagle	Nonthaburi	<10	<10
1419	Dog	2021-02-01	0 Y 2 M 16 D	Male	Thai Bangkaew	Nakhon Pathom	<10	<10
1420	Dog	2021-02-01	13 Y 0 M 0 D	Male	Mixed Breed	Bangkok	<10	<10
1421	Dog	2021-02-01	2 Y 5 M 0 D	Male	Poodle Mix	Samut Sakhon	<10	<10
1422	Dog	2021-02-01	16 Y 9 M 0 D	Male	Shih Tzu	Nakhon Pathom	<10	<10
1423	Dog	2021-02-01	4 Y 1 M 0 D	Male	Thai Bangkaew Mix	Samut Sakhon	<10	<10
1424	Dog	2021-02-01	9 Y 1 M 0 D	Female	Poodle	Bangkok	<10	<10
1425	Dog	2021-02-01	7 Y 1 M 0 D	Male	Mixed Breed	Nonthaburi	<10	<10
1426	Dog	2021-02-01	14 Y 10 M 0 D	Male	Thai	Bangkok	<10	<10
1427	Dog	2021-02-01	11 Y 5 M 0 D	Female	Mixed Breed	Nakhon Pathom	<10	<10
1428	Dog	2021-02-01	0 Y 5 M 9 D	Female	Thai	Bangkok	<10	<10
1429	Dog	2021-02-01	10 Y 0 M 0 D	Female	Shih Tzu Mix	Nakhon Pathom	<10	<10
1430	Dog	2021-02-01	8 Y 11 M 0 D	Female	Chihuahua	Nakhon Pathom	<10	<10
1431	Cat	2021-02-01	10 Y 1 M 0 D	Male	Persian	Nakhon Pathom	<10	<10
1432	Cat	2021-02-01	13 Y 1 M 0 D	Female	Thai	Bangkok	<10	<10
1433	Cat	2021-02-01	14 Y 0 M 0 D	Male	Siamese	Nakhon Pathom	<10	<10
1434	Cat	2021-02-01	0 Y 2 M 6 D	Male	Thai	Nonthaburi	<10	<10
1435	Dog	2021-02-03	8 Y 7 M 2 D	Male	Pomeranian	Nakhon Pathom	<10	<10
1436	Dog	2021-02-03	5 Y 1 M 2 D	Male	Thai	Bangkok	<10	<10
1437	Dog	2021-02-03	8 Y 8 M 2 D	Male	Labrador Retriever	Nakhon Pathom	<10	<10
1438	Dog	2021-02-03	13 Y 1 M 2 D	Male	Thai	Nonthaburi	<10	<10
1439	Dog	2021-02-03	7 Y 1 M 2 D	Male	Chihuahua	Nakhon Pathom	<10	<10
1440	Dog	2021-02-03	2 Y 8 M 10 D	Female	Siberian Husky	Bangkok	<10	<10
1441	Dog	2021-02-03	7 Y 1 M 2 D	Male	Thai	Nonthaburi	<10	<10
1442	Dog	2021-02-03	10 Y 8 M 2 D	Female	Labrador Retriever	Nonthaburi	<10	<10
1443	Dog	2021-02-03	15 Y 9 M 2 D	Male	Thai	Nakhon Pathom	<10	<10
1444	Dog	2021-02-03	4 Y 0 M 4 D	Female	Siberian Husky	Bangkok	<10	<10
1445	Dog	2021-02-03	10 Y 5 M 16 D	Male	Golden Retriever	Nonthaburi	<10	<10
1446	Dog	2021-02-03	8 Y 11 M 20 D	Male	Beagle	Samut Prakan	<10	<10
1447	Cat	2021-02-03	1 Y 0 M 2 D	Female	Khao Manee	Nakhon Pathom	<10	<10
1448	Cat	2021-02-03	2 Y 7 M 2 D	Male	Thai	Bangkok	<10	<10
1449	Cat	2021-02-03	10 Y 1 M 2 D	Male	Thai	Bangkok	<10	<10
1450	Cat	2021-02-03	0 Y 0 M 4 D	Female	Thai	Nonthaburi	<10	<10
1451	Cat	2021-02-03	3 Y 1 M 2 D	Female	Chinchilla	Bangkok	<10	<10
1452	Dog	2021-02-03	12 Y 1 M 2 D	Male	Thai Bangkaew Mix	Bangkok	<10	<10
1453	Dog	2021-02-05	6 Y 8 M 4 D	Female	Fila Brasileiro	Samut Sakhon	<10	<10
1454	Dog	2021-02-05	13 Y 0 M 4 D	Female	Thai	Bangkok	<10	<10
1455	Dog	2021-02-05	6 Y 1 M 4 D	Male	Thai	Bangkok	<10	<10
1456	Dog	2021-02-05	8 Y 8 M 4 D	Male	Poodle	Nonthaburi	<10	<10
1457	Dog	2021-02-05	10 Y 9 M 4 D	Male	Shih Tzu	Bangkok	<10	<10
1458	Dog	2021-02-05	10 Y 5 M 18 D	Male	Golden Retriever	Nonthaburi	<10	<10
1459	Dog	2021-02-05	1 Y 2 M 0 D	Female	Thai	Bangkok	<10	<10
1460	Dog	2021-02-05	10 Y 5 M 4 D	Female	Poodle	Bangkok	<10	<10
1461	Dog	2021-02-05	13 Y 9 M 4 D	Female	Thai	Bangkok	<10	<10
1462	Dog	2021-02-05	14 Y 1 M 4 D	Male	Pug	Nakhon Pathom	<10	<10
1463	Dog	2021-02-05	13 Y 4 M 4 D	Male	Thai	Samut Sakhon	<10	<10
1464	Cat	2021-02-05	4 Y 0 M 4 D	Male	Thai	Samut Sakhon	<10	<10
1465	Cat	2021-02-05	7 Y 4 M 4 D	Male	Siamese	Bangkok	<10	<10
1466	Cat	2021-02-05	7 Y 0 M 4 D	Female	Thai	Bangkok	<10	<10
1467	Cat	2021-02-05	0 Y 0 M 29 D	Female	Thai	Nonthaburi	<10	<10
1468	Cat	2021-02-05	0 Y 8 M 4 D	Male	Persian Mix	Bangkok	<10	<10
1469	Dog	2021-02-08	0 Y 9 M 7 D	Male	Thai	Bangkok	<10	<10
1470	Dog	2021-02-08	13 Y 2 M 7 D	Female	Shih Tzu	Bangkok	<10	<10
1471	Dog	2021-02-08	5 Y 5 M 7 D	Female	Mixed Breed	Nonthaburi	<10	<10
1472	Dog	2021-02-08	6 Y 1 M 0 D	Female	Chihuahua	Bangkok	<10	<10
1473	Dog	2021-02-08	4 Y 1 M 7 D	Male	Thai Bangkaew Mix	Samut Sakhon	<10	<10
1474	Dog	2021-02-08	9 Y 0 M 7 D	Male	Shih Tzu	Nonthaburi	<10	<10
1475	Dog	2021-02-08	10 Y 0 M 11 D	Male	Mixed Breed	Bangkok	<10	<10
1476	Dog	2021-02-08	12 Y 5 M 15 D	Female	Golden Retriever	Bangkok	<10	<10
1477	Dog	2021-02-08	13 Y 0 M 1 D	Female	Shih Tzu	Bangkok	<10	<10
1478	Dog	2021-02-08	10 Y 3 M 24 D	Female	Mixed Breed	Samut Sakhon	<10	<10
1479	Dog	2021-02-08	12 Y 3 M 7 D	Male	Poodle Mix	Nonthaburi	<10	<10
1480	Cat	2021-02-08	0 Y 7 M 9 D	Female	Thai	Nakhon Pathom	<10	<10
1481	Cat	2021-02-08	10 Y 1 M 6 D	Female	Thai	Bangkok	<10	<10
1482	Cat	2021-02-08	1 Y 10 M 7 D	Male	Thai	Nakhon Pathom	<10	<10
1483	Cat	2021-02-08	10 Y 1 M 7 D	Male	Persian	Nakhon Pathom	<10	<10
1484	Dog	2021-02-10	8 Y 0 M 9 D	Female	Thai Mix	Samut Sakhon	<10	<10
1485	Dog	2021-02-10	16 Y 9 M 1 D	Male	Shih Tzu Mix	Bangkok	<10	<10
1486	Dog	2021-02-10	7 Y 1 M 9 D	Male	Thai	Nonthaburi	<10	<10
1487	Dog	2021-02-10	6 Y 0 M 9 D	Male	Mixed Breed	Bangkok	<10	<10
1488	Dog	2021-02-10	5 Y 9 M 9 D	Female	Pomeranian	Nonthaburi	<10	<10
1489	Dog	2021-02-10	16 Y 1 M 9 D	Female	Shih Tzu	Nonthaburi	<10	<10
1490	Dog	2021-02-10	12 Y 1 M 9 D	Male	Thai	Bangkok	<10	<10
1491	Dog	2021-02-10	9 Y 10 M 9 D	Female	Mixed Breed	Bangkok	<10	<10
1492	Dog	2021-02-10	4 Y 6 M 9 D	Female	Thai	Nonthaburi	<10	<10
1493	Dog	2021-02-10	6 Y 1 M 2 D	Female	Chihuahua	Bangkok	<10	<10
1494	Cat	2021-02-10	6 Y 11 M 9 D	Male	Thai	Nonthaburi	<10	<10
1495	Cat	2021-02-10	0 Y 8 M 9 D	Female	Thai	Samut Sakhon	40	40
1496	Cat	2021-02-10	16 Y 9 M 8 D	Female	Thai	Bangkok	<10	<10
1497	Cat	2021-02-10	7 Y 1 M 9 D	Female	Thai	Samut Sakhon	<10	<10
1498	Cat	2021-02-10	6 Y 3 M 9 D	Male	Thai	Nakhon Pathom	<10	<10
1499	Cat	2021-02-10	2 Y 1 M 9 D	Female	Beagle	Nakhon Pathom	<10	<10
1500	Cat	2021-02-10	1 Y 8 M 9 D	Male	Thai	Nonthaburi	<10	<10
1501	Cat	2021-02-10	2 Y 2 M 2 D	Female	Mixed Breed	Nonthaburi	<10	<10
1502	Dog	2021-02-15	6 Y 6 M 14 D	Female	Rottweiler	Nakhon Pathom	<10	<10
1503	Dog	2021-02-15	12 Y 11 M 14 D	Female	Thai	Bangkok	<10	<10
1504	Dog	2021-02-15	14 Y 1 M 14 D	Male	Pug	Nakhon Pathom	<10	<10
1505	Dog	2021-02-15	8 Y 1 M 4 D	Male	Thai Mix	Samut Sakhon	<10	<10
1506	Dog	2021-02-15	7 Y 0 M 14 D	Male	Chihuahua	Nakhon Pathom	<10	<10
1507	Dog	2021-02-15	8 Y 0 M 14 D	Male	Poodle	Nonthaburi	<10	<10
1508	Dog	2021-02-15	12 Y 5 M 19 D	Male	Shih Tzu	Bangkok	<10	<10
1509	Dog	2021-02-15	8 Y 0 M 14 D	Female	Thai	Nakhon Pathom	<10	<10
1510	Dog	2021-02-15	2 Y 9 M 4 D	Male	English Bulldog	Nonthaburi	<10	<10
1511	Dog	2021-02-15	2 Y 5 M 14 D	Male	Thai Bangkaew	Nakhon Pathom	<10	<10
1512	Dog	2021-02-15	14 Y 11 M 14 D	Female	Beagle	Samut Sakhon	<10	<10
1513	Dog	2021-02-15	6 Y 9 M 14 D	Male	Siberian Husky	Bangkok	<10	<10
1514	Dog	2021-02-15	19 Y 3 M 14 D	Female	Shih Tzu Mix	Nonthaburi	<10	<10
1515	Dog	2021-02-15	9 Y 5 M 14 D	Female	Siberian Husky	Bangkok	<10	<10
1516	Dog	2021-02-15	9 Y 0 M 14 D	Male	Thai	Nakhon Pathom	<10	<10
1517	Dog	2021-02-15	0 Y 0 M 4 D	Female	Thai Mix	Nakhon Pathom	<10	<10
1518	Dog	2021-02-15	0 Y 9 M 14 D	Male	Thai	Bangkok	<10	<10
1519	Dog	2021-02-15	10 Y 0 M 14 D	Male	Thai Bangkaew	Bangkok	<10	<10
1520	Dog	2021-02-15	5 Y 0 M 14 D	Female	Thai	Nakhon Pathom	<10	<10
1521	Cat	2021-02-15	14 Y 0 M 14 D	Male	Thai	Nakhon Pathom	<10	<10
1522	Cat	2021-02-15	1 Y 10 M 14 D	Male	Thai	Nakhon Pathom	<10	<10
1523	Cat	2021-02-15	7 Y 1 M 14 D	Male	Persian	Bangkok	<10	<10
1524	Cat	2021-02-15	1 Y 4 M 18 D	Male	Scottish Fold Mix	Bangkok	<10	<10
1525	Cat	2021-02-15	3 Y 0 M 14 D	Female	Thai	Bangkok	<10	<10
1526	Cat	2021-02-15	0 Y 7 M 26 D	Female	Thai	Nakhon Pathom	<10	<10
1527	Cat	2021-02-15	3 Y 6 M 14 D	Male	Thai	Samut Prakan	<10	<10
1528	Cat	2021-02-15	11 Y 0 M 14 D	Male	Persian	Bangkok	<10	<10
1529	Cat	2021-02-15	6 Y 1 M 14 D	Male	Siamese	Samut Sakhon	<10	<10
1530	Cat	2021-02-15	2 Y 0 M 14 D	Female	Thai	Bangkok	<10	<10
1531	Dog	2021-02-17	17 Y 7 M 16 D	Male	Pekingese	Bangkok	<10	<10
1532	Dog	2021-02-17	7 Y 1 M 16 D	Male	Thai	Nonthaburi	<10	<10
1533	Dog	2021-02-17	1 Y 5 M 16 D	Male	Thai	Nonthaburi	<10	<10
1534	Dog	2021-02-17	6 Y 9 M 6 D	Male	Thai	Bangkok	<10	<10
1535	Dog	2021-02-17	9 Y 5 M 26 D	Male	Siberian Husky	Bangkok	<10	<10
1536	Dog	2021-02-17	6 Y 1 M 16 D	Male	Thai	Bangkok	<10	<10
1537	Dog	2021-02-17	8 Y 2 M 9 D	Male	Beagle Mix	Bangkok	<10	<10
1538	Dog	2021-02-17	9 Y 3 M 16 D	Female	Thai	Nonthaburi	<10	<10
1539	Dog	2021-02-17	12 Y 4 M 14 D	Male	Labrador Retriever	Bangkok	<10	<10
1540	Dog	2021-02-17	0 Y 5 M 24 D	Male	Welsh corgi	Bangkok	<10	<10
1541	Cat	2021-02-17	11 Y 11 M 16 D	Female	Thai	Nonthaburi	<10	<10
1542	Cat	2021-02-17	10 Y 9 M 16 D	Female	Persian	Bangkok	<10	<10
1543	Cat	2021-02-17	0 Y 0 M 13 D	Male	Thai	Nonthaburi	<10	<10
1544	Cat	2021-02-17	3 Y 9 M 16 D	Male	Mixed Breed	Bangkok	<10	<10
1545	Cat	2021-02-17	0 Y 10 M 16 D	Male	Thai	Bangkok	<10	<10
1546	Cat	2021-02-17	0 Y 0 M 9 D	Female	Thai	Nakhon Pathom	<10	<10
1547	Cat	2021-02-17	13 Y 7 M 16 D	Female	Siamese	Bangkok	<10	<10
1548	Cat	2021-02-17	2 Y 0 M 15 D	Male	Thai	Nonthaburi	<10	<10
1549	Cat	2021-02-17	3 Y 6 M 19 D	Male	Siberian Husky	Bangkok	<10	<10
1550	Dog	2021-02-19	8 Y 7 M 18 D	Female	Beagle	Bangkok	<10	<10
1551	Dog	2021-02-19	9 Y 0 M 18 D	Male	Thai	Nakhon Pathom	<10	<10
1552	Dog	2021-02-19	5 Y 0 M 4 D	Female	Shih Tzu	Nakhon Pathom	<10	<10
1553	Dog	2021-02-19	11 Y 4 M 18 D	Male	Labrador Retriever	Bangkok	<10	<10
1554	Dog	2021-02-19	1 Y 4 M 4 D	Male	Doberman Pinscher	Nakhon Pathom	<10	<10
1555	Dog	2021-02-19	8 Y 2 M 18 D	Female	Mixed Breed	Nakhon Pathom	<10	<10
1556	Dog	2021-02-19	8 Y 0 M 18 D	Female	Thai	Nakhon Pathom	<10	<10
1557	Dog	2021-02-19	12 Y 3 M 18 D	Male	Thai	Bangkok	<10	<10
1558	Dog	2021-02-19	13 Y 2 M 28 D	Female	Mixed Breed	Nakhon Pathom	<10	<10
1559	Dog	2021-02-19	14 Y 0 M 4 D	Female	Labrador Retriever	Bangkok	<10	<10
1560	Dog	2021-02-19	13 Y 4 M 18 D	Male	Thai	Samut Sakhon	<10	<10
1561	Dog	2021-02-19	7 Y 6 M 9 D	Male	Shih Tzu Mix	Nakhon Pathom	<10	<10
1562	Dog	2021-02-19	12 Y 5 M 18 D	Male	Siberian Husky	Bangkok	<10	<10
1563	Dog	2021-02-19	1 Y 11 M 4 D	Female	Poodle	Nakhon Pathom	<10	<10
1564	Dog	2021-02-19	9 Y 3 M 11 D	Female	Beagle	Bangkok	<10	<10
1565	Dog	2021-02-19	6 Y 1 M 18 D	Male	Thai	Bangkok	<10	<10
1566	Cat	2021-02-19	5 Y 3 M 14 D	Female	Thai	Nakhon Pathom	<10	<10
1567	Cat	2021-02-19	14 Y 3 M 22 D	Male	Thai	Bangkok	<10	<10
1568	Dog	2021-02-22	0 Y 9 M 21 D	Male	Thai	Bangkok	<10	<10
1569	Dog	2021-02-22	7 Y 8 M 21 D	Male	Pomeranian	Bangkok	<10	<10
1570	Dog	2021-02-22	4 Y 1 M 27 D	Female	Pomeranian	Nakhon Pathom	<10	<10
1571	Dog	2021-02-22	8 Y 0 M 21 D	Female	Chihuahua	Nakhon Pathom	<10	<10
1572	Dog	2021-02-22	10 Y 0 M 21 D	Female	Mixed Breed	Nakhon Pathom	<10	<10
1573	Dog	2021-02-22	11 Y 0 M 21 D	Male	Shih Tzu	Nonthaburi	<10	<10
1574	Dog	2021-02-22	13 Y 3 M 21 D	Female	Thai	Nonthaburi	<10	<10
1575	Dog	2021-02-22	12 Y 3 M 21 D	Male	Shih Tzu	Bangkok	<10	<10
1576	Dog	2021-02-22	10 Y 2 M 21 D	Female	Mixed Breed	Bangkok	<10	<10
1577	Dog	2021-02-22	3 Y 8 M 21 D	Female	Pomeranian	Nakhon Pathom	<10	<10
1578	Dog	2021-02-22	9 Y 5 M 21 D	Male	Thai Bangkaew	Nakhon Pathom	<10	<10
1579	Dog	2021-02-22	10 Y 1 M 21 D	Female	Mixed Breed	Bangkok	<10	<10
1580	Cat	2021-02-22	2 Y 7 M 4 D	Female	American Shorthair	Bangkok	<10	<10
1581	Cat	2021-02-22	0 Y 4 M 13 D	Male	Persian	Bangkok	<10	<10
1582	Cat	2021-02-22	12 Y 2 M 21 D	Female	Mixed Breed	Nakhon Pathom	<10	<10
1583	Cat	2021-02-22	1 Y 0 M 8 D	Male	Thai	Bangkok	<10	<10
1584	Cat	2021-02-22	5 Y 1 M 15 D	Male	Persian	Nonthaburi	<10	<10
1585	Cat	2021-02-22	7 Y 1 M 21 D	Female	Thai	Samut Sakhon	<10	<10
1586	Cat	2021-02-22	6 Y 3 M 21 D	Female	Thai	Bangkok	<10	<10
1587	Dog	2021-02-24	10 Y 0 M 23 D	Male	Thai	Bangkok	<10	<10
1588	Dog	2021-02-24	13 Y 0 M 9 D	Female	Mixed Breed	Bangkok	<10	<10
1589	Dog	2021-02-24	3 Y 9 M 4 D	Female	Pomeranian	Nonthaburi	<10	<10
1590	Dog	2021-02-24	8 Y 0 M 23 D	Female	Thai	Nakhon Pathom	<10	<10
1591	Dog	2021-02-24	12 Y 6 M 23 D	Male	Mixed Breed	Bangkok	<10	<10
1592	Dog	2021-02-24	0 Y 7 M 23 D	Female	Thai	Bangkok	<10	<10
1593	Dog	2021-02-24	8 Y 8 M 23 D	Male	Labrador Retriever	Nakhon Pathom	<10	<10
1594	Dog	2021-02-24	12 Y 5 M 23 D	Male	Siberian Husky	Bangkok	<10	<10
1595	Dog	2021-02-24	3 Y 0 M 23 D	Female	Thai	Samut Sakhon	<10	<10
1596	Dog	2021-02-24	14 Y 5 M 23 D	Male	Pug	Bangkok	<10	<10
1597	Cat	2021-02-24	0 Y 5 M 23 D	Male	Thai	Bangkok	<10	<10
1598	Cat	2021-02-24	5 Y 0 M 23 D	Male	Siamese	Bangkok	<10	<10
1599	Cat	2021-02-24	10 Y 1 M 23 D	Male	Thai	Bangkok	<10	<10
1600	Cat	2021-02-24	13 Y 10 M 23 D	Male	Thai	Nonthaburi	<10	<10
1601	Cat	2021-02-24	9 Y 2 M 23 D	Female	Siamese	Nonthaburi	<10	<10
1602	Cat	2021-02-24	16 Y 9 M 22 D	Female	Thai	Bangkok	<10	<10
1603	Cat	2021-02-24	0 Y 9 M 23 D	Male	Thai	Bangkok	<10	<10
1604	Cat	2021-02-24	0 Y 10 M 23 D	Male	Thai	Bangkok	<10	<10
1605	Cat	2021-02-24	3 Y 10 M 23 D	Male	Persian Mix	Nonthaburi	<10	<10
1606	Cat	2021-02-24	3 Y 0 M 23 D	Male	Thai	Samut Sakhon	<10	<10
1607	Dog	2021-03-01	0 Y 10 M 0 D	Male	Thai	Bangkok	<10	<10
1608	Dog	2021-03-01	0 Y 1 M 27 D	Female	Golden Retriever	Bangkok	<10	<10
1609	Dog	2021-03-01	17 Y 8 M 0 D	Male	Pekingese	Bangkok	<10	<10
1610	Dog	2021-03-01	9 Y 6 M 18 D	Female	Thai Bangkaew Mix	Bangkok	<10	<10
1611	Dog	2021-03-01	14 Y 6 M 0 D	Male	Shih Tzu Mix	Nonthaburi	<10	<10
1612	Dog	2021-03-01	0 Y 10 M 0 D	Male	Thai	Samut Sakhon	<10	<10
1613	Dog	2021-03-01	15 Y 1 M 0 D	Female	Thai Bangkaew	Nonthaburi	<10	<10
1614	Dog	2021-03-01	10 Y 1 M 0 D	Male	Thai	Bangkok	<10	<10
1615	Dog	2021-03-01	9 Y 6 M 0 D	Female	Chihuahua	Bangkok	<10	<10
1616	Dog	2021-03-01	8 Y 1 M 0 D	Female	Poodle	Nakhon Pathom	<10	<10
1617	Cat	2021-03-01	0 Y 7 M 11 D	Male	Thai	Bangkok	<10	<10
1618	Cat	2021-03-01	10 Y 2 M 0 D	Female	Thai	Bangkok	<10	<10
1619	Cat	2021-03-01	0 Y 0 M 11 D	Female	Thai	Bangkok	<10	<10
1620	Cat	2021-03-01	1 Y 1 M 0 D	Male	Thai	Nakhon Pathom	<10	<10
1621	Cat	2021-03-01	10 Y 9 M 0 D	Female	Blue Point Siamese	Bangkok	<10	<10
1622	Cat	2021-03-01	6 Y 7 M 0 D	Male	Thai	Nonthaburi	<10	<10
1623	Cat	2021-03-01	9 Y 2 M 0 D	Male	Thai	Nonthaburi	<10	<10
1624	Cat	2021-03-01	0 Y 9 M 0 D	Male	Thai	Bangkok	<10	<10
1625	Cat	2021-03-01	3 Y 1 M 0 D	Male	Thai	Samut Sakhon	<10	<10
1626	Cat	2021-03-01	3 Y 5 M 20 D	Male	Sphynx	Nonthaburi	<10	<10
1627	Dog	2021-03-03	9 Y 5 M 2 D	Male	Golden Retriever	Nonthaburi	<10	<10
1628	Dog	2021-03-03	16 Y 7 M 2 D	Female	Shih Tzu	Nonthaburi	<10	<10
1629	Dog	2021-03-03	6 Y 1 M 2 D	Female	Thai	Nonthaburi	<10	<10
1630	Dog	2021-03-03	1 Y 3 M 2 D	Male	Thai Bangkaew	Nakhon Pathom	<10	<10
1631	Dog	2021-03-03	14 Y 1 M 2 D	Male	Mixed Breed	Nakhon Pathom	<10	<10
1632	Dog	2021-03-03	0 Y 5 M 2 D	Male	Thai	Bangkok	<10	<10
1633	Dog	2021-03-03	0 Y 0 M 4 D	Male	Thai	Bangkok	<10	<10
1634	Dog	2021-03-03	1 Y 2 M 2 D	Male	Thai Bangkaew Mix	Nakhon Pathom	<10	<10
1635	Cat	2021-03-03	2 Y 8 M 15 D	Female	Thai	Bangkok	<10	<10
1636	Cat	2021-03-03	2 Y 11 M 2 D	Male	Thai	Bangkok	<10	<10
1637	Cat	2021-03-03	0 Y 0 M 4 D	Male	Thai	Nonthaburi	<10	<10
1638	Cat	2021-03-03	0 Y 6 M 2 D	Male	Siamese	Bangkok	<10	<10
1639	Cat	2021-03-03	0 Y 0 M 4 D	Male	Thai	Bangkok	<10	<10
1640	Cat	2021-03-03	6 Y 1 M 2 D	Male	Thai	Nakhon Pathom	<10	<10
1641	Cat	2021-03-03	12 Y 1 M 2 D	Female	American Shorthair	Bangkok	<10	<10
1642	Cat	2021-03-03	6 Y 4 M 2 D	Male	Thai	Nakhon Pathom	<10	<10
1643	Cat	2021-03-03	10 Y 9 M 2 D	Female	Blue Point Siamese	Bangkok	<10	<10
1644	Cat	2021-03-03	2 Y 7 M 13 D	Female	American Shorthair	Bangkok	<10	<10
1645	Cat	2021-03-03	4 Y 1 M 2 D	Female	Thai	Nakhon Pathom	<10	<10
1646	Cat	2021-03-03	13 Y 1 M 2 D	Female	Thai	Samut Sakhon	<10	<10
1647	Dog	2021-03-05	11 Y 9 M 4 D	Female	Shih Tzu	Nonthaburi	<10	<10
1648	Dog	2021-03-05	10 Y 10 M 17 D	Female	Mixed Breed	Nakhon Pathom	<10	<10
1649	Dog	2021-03-05	13 Y 1 M 2 D	Male	Shih Tzu Mix	Bangkok	<10	<10
1650	Dog	2021-03-05	11 Y 9 M 18 D	Female	Poodle	Bangkok	<10	<10
1651	Dog	2021-03-05	11 Y 4 M 23 D	Female	Thai Bangkaew	Bangkok	<10	<10
1652	Dog	2021-03-05	4 Y 8 M 15 D	Male	Pug	Nakhon Pathom	<10	<10
1653	Dog	2021-03-05	4 Y 6 M 4 D	Female	Mixed Breed	Samut Sakhon	<10	<10
1654	Dog	2021-03-05	8 Y 6 M 4 D	Male	Mixed Breed	Nakhon Pathom	<10	<10
1655	Dog	2021-03-05	9 Y 1 M 4 D	Male	Thai	Nakhon Pathom	<10	<10
1656	Dog	2021-03-05	5 Y 7 M 4 D	Female	Beagle	Nonthaburi	<10	<10
1657	Cat	2021-03-05	1 Y 7 M 4 D	Female	Thai	Bangkok	<10	<10
1658	Cat	2021-03-05	2 Y 10 M 10 D	Male	Persian Mix	Nakhon Pathom	<10	<10
1659	Cat	2021-03-05	3 Y 0 M 4 D	Female	Scottish Fold	Nakhon Pathom	<10	<10
1660	Cat	2021-03-05	0 Y 2 M 1 D	Female	Thai	Bangkok	<10	<10
1661	Cat	2021-03-05	0 Y 8 M 18 D	Female	Persian	Nonthaburi	<10	<10
1662	Cat	2021-03-05	0 Y 0 M 4 D	Male	Mixed Breed	Nonthaburi	<10	<10
1663	Cat	2021-03-05	13 Y 1 M 4 D	Female	Siamese	Nakhon Pathom	<10	<10
1664	Cat	2021-03-05	7 Y 2 M 4 D	Male	Thai	Nakhon Pathom	<10	<10
1665	Cat	2021-03-05	3 Y 1 M 4 D	Male	Thai	Samut Sakhon	<10	<10
1666	Cat	2021-03-05	4 Y 0 M 4 D	Female	Persian	Bangkok	<10	<10
1667	Dog	2021-03-08	7 Y 2 M 7 D	Female	Chihuahua	Bangkok	<10	<10
1668	Dog	2021-03-08	12 Y 9 M 10 D	Male	Poodle Mix	Bangkok	<10	<10
1669	Dog	2021-03-08	9 Y 9 M 19 D	Male	Shih Tzu	Nakhon Pathom	<10	<10
1670	Dog	2021-03-08	1 Y 5 M 3 D	Male	Shih Tzu	Nonthaburi	<10	<10
1671	Dog	2021-03-08	1 Y 0 M 7 D	Female	Thai	Nakhon Pathom	<10	<10
1672	Dog	2021-03-08	5 Y 0 M 7 D	Female	Shih Tzu	Bangkok	<10	<10
1673	Dog	2021-03-08	13 Y 11 M 7 D	Male	Pomeranian	Pathum Thani	<10	<10
1674	Dog	2021-03-08	14 Y 6 M 18 D	Female	Poodle	Bangkok	<10	<10
1675	Dog	2021-03-08	0 Y 10 M 7 D	Male	Thai	Bangkok	<10	<10
1676	Dog	2021-03-08	4 Y 1 M 7 D	Female	Poodle Mix	Pathum Thani	<10	<10
1677	Dog	2021-03-08	6 Y 10 M 7 D	Male	Siberian Husky	Bangkok	<10	<10
1678	Dog	2021-03-08	5 Y 9 M 13 D	Male	Pomeranian	Bangkok	<10	<10
1679	Cat	2021-03-08	0 Y 0 M 4 D	Female	Thai	Bangkok	<10	<10
1680	Cat	2021-03-08	11 Y 1 M 7 D	Male	Persian	Bangkok	<10	<10
1681	Cat	2021-03-08	3 Y 7 M 16 D	Female	Thai	Nakhon Pathom	<10	<10
1682	Cat	2021-03-08	16 Y 0 M 7 D	Female	Thai	Bangkok	<10	<10
1683	Cat	2021-03-08	6 Y 1 M 7 D	Male	Thai	Bangkok	<10	<10
1684	Cat	2021-03-08	0 Y 0 M 6 D	Female	Thai	Nonthaburi	<10	<10
1685	Cat	2021-03-08	0 Y 5 M 8 D	Female	Mixed Breed	Nonthaburi	<10	<10
1686	Cat	2021-03-08	10 Y 9 M 7 D	Female	Thai	Bangkok	<10	<10
1687	Cat	2021-03-10	0 Y 11 M 4 D	Female	Scottish Fold	Nakhon Pathom	<10	<10
1688	Cat	2021-03-10	2 Y 0 M 4 D	Male	Thai	Bangkok	<10	<10
1689	Cat	2021-03-10	10 Y 6 M 9 D	Male	Siamese	Nonthaburi	<10	<10
1690	Cat	2021-03-10	3 Y 2 M 9 D	Male	Thai	Bangkok	<10	<10
1691	Cat	2021-03-10	1 Y 7 M 9 D	Female	Thai	Bangkok	<10	<10
1692	Dog	2021-03-10	10 Y 7 M 19 D	Female	Shih Tzu	Nonthaburi	<10	<10
1693	Cat	2021-03-10	5 Y 2 M 3 D	Male	Persian	Nonthaburi	<10	<10
1694	Dog	2021-03-10	6 Y 3 M 9 D	Female	Siberian Husky	Bangkok	<10	<10
1695	Dog	2021-03-10	10 Y 2 M 9 D	Male	Poodle	Bangkok	<10	<10
1696	Dog	2021-03-10	13 Y 1 M 9 D	Female	Poodle	Nonthaburi	<10	<10
1697	Dog	2021-03-10	0 Y 6 M 1 D	Male	Labrador Retriever	Bangkok	<10	<10
1698	Dog	2021-03-10	10 Y 2 M 18 D	Male	Shih Tzu Mix	Nonthaburi	<10	<10
1699	Dog	2021-03-10	12 Y 7 M 9 D	Male	Siberian Husky	Bangkok	<10	<10
1700	Dog	2021-03-10	15 Y 10 M 9 D	Female	Shih Tzu	Nonthaburi	<10	<10
1701	Dog	2021-03-10	16 Y 0 M 9 D	Male	Shih Tzu	Bangkok	<10	<10
1702	Dog	2021-03-10	8 Y 0 M 9 D	Female	Shih Tzu Mix	Bangkok	<10	<10
1703	Dog	2021-03-10	8 Y 7 M 9 D	Female	Mixed Breed	Bangkok	<10	<10
1704	Dog	2021-03-10	6 Y 10 M 9 D	Male	Siberian Husky	Bangkok	<10	<10
1705	Dog	2021-03-10	9 Y 3 M 9 D	Female	Labrador Retriever	Nonthaburi	<10	<10
1706	Dog	2021-03-10	4 Y 1 M 9 D	Female	Poodle Mix	Pathum Thani	<10	<10
1707	Dog	2021-03-12	9 Y 0 M 11 D	Male	Chihuahua	Nonthaburi	<10	<10
1708	Dog	2021-03-12	16 Y 0 M 11 D	Male	Shih Tzu	Bangkok	<10	<10
1709	Dog	2021-03-12	5 Y 1 M 11 D	Female	Thai	Nakhon Pathom	<10	<10
1710	Dog	2021-03-12	6 Y 10 M 11 D	Male	Chihuahua	Nakhon Pathom	<10	<10
1711	Dog	2021-03-12	12 Y 9 M 14 D	Male	Poodle Mix	Bangkok	<10	<10
1712	Dog	2021-03-12	11 Y 4 M 11 D	Male	Mixed Breed	Nakhon Pathom	<10	<10
1713	Dog	2021-03-12	11 Y 10 M 16 D	Female	Shih Tzu	Bangkok	<10	<10
1714	Dog	2021-03-12	7 Y 0 M 11 D	Female	Beagle	Bangkok	<10	<10
1715	Dog	2021-03-12	16 Y 1 M 11 D	Male	Shih Tzu	Bangkok	<10	<10
1716	Dog	2021-03-12	0 Y 4 M 11 D	Female	Thai	Nakhon Pathom	<10	<10
1717	Dog	2021-03-12	12 Y 1 M 11 D	Male	Poodle	Nakhon Pathom	<10	<10
1718	Dog	2021-03-12	11 Y 6 M 11 D	Female	German Shepherd	Bangkok	<10	<10
1719	Dog	2021-03-12	13 Y 7 M 2 D	Female	Poodle	Nakhon Pathom	<10	<10
1720	Cat	2021-03-12	6 Y 3 M 11 D	Male	Thai	Bangkok	<10	<10
1721	Cat	2021-03-12	3 Y 7 M 20 D	Female	Thai	Nakhon Pathom	<10	<10
1722	Cat	2021-03-12	1 Y 0 M 11 D	Female	Thai	Bangkok	<10	<10
1723	Cat	2021-03-12	2 Y 3 M 11 D	Male	Thai	Bangkok	<10	<10
1724	Cat	2021-03-12	16 Y 10 M 9 D	Male	Blue Point Siamese	Bangkok	<10	<10
1725	Cat	2021-03-12	5 Y 0 M 11 D	Male	Persian	Bangkok	<10	<10
1726	Dog	2021-03-15	13 Y 3 M 1 D	Female	Golden Retriever	Nonthaburi	<10	<10
1727	Dog	2021-03-15	11 Y 0 M 17 D	Female	Thai	Nakhon Pathom	<10	<10
1728	Dog	2021-03-15	6 Y 8 M 14 D	Female	Thai	Nonthaburi	<10	<10
1729	Dog	2021-03-15	11 Y 10 M 14 D	Female	Mixed Breed	Bangkok	<10	<10
1730	Dog	2021-03-15	13 Y 0 M 14 D	Female	Shih Tzu Mix	Nonthaburi	<10	<10
1731	Dog	2021-03-15	12 Y 4 M 14 D	Male	Basset Hound	Bangkok	<10	<10
1732	Dog	2021-03-15	8 Y 0 M 14 D	Female	Shih Tzu Mix	Bangkok	<10	<10
1733	Dog	2021-03-15	12 Y 6 M 14 D	Male	Chihuahua	Bangkok	<10	<10
1734	Dog	2021-03-15	5 Y 9 M 14 D	Female	Mixed Breed	Bangkok	<10	<10
1735	Dog	2021-03-15	11 Y 6 M 14 D	Female	Beagle	Nonthaburi	<10	<10
1736	Dog	2021-03-15	12 Y 2 M 14 D	Female	Thai	Bangkok	<10	<10
1737	Cat	2021-03-15	13 Y 1 M 14 D	Female	Thai	Samut Sakhon	<10	<10
1738	Cat	2021-03-15	1 Y 0 M 14 D	Female	Scottish Fold	Pathum Thani	<10	<10
1739	Cat	2021-03-15	16 Y 8 M 14 D	Male	Siamese	Bangkok	<10	<10
1740	Cat	2021-03-15	11 Y 5 M 18 D	Male	Thai	Bangkok	<10	<10
1741	Cat	2021-03-15	11 Y 1 M 14 D	Female	Siamese	Bangkok	<10	<10
1742	Cat	2021-03-15	6 Y 0 M 14 D	Male	Thai	Samut Prakan	<10	<10
1743	Cat	2021-03-15	1 Y 9 M 14 D	Female	Persian	Nakhon Pathom	<10	<10
1744	Cat	2021-03-15	0 Y 0 M 4 D	Male	Thai	Samut Sakhon	<10	<10
1745	Cat	2021-03-15	5 Y 1 M 14 D	Male	Scottish Fold	Ratchaburi	<10	<10
1746	Dog	2021-03-17	0 Y 3 M 3 D	Male	French Bulldog	Bangkok	<10	<10
1747	Dog	2021-03-17	14 Y 3 M 16 D	Male	Poodle	Bangkok	<10	<10
1748	Dog	2021-03-17	4 Y 7 M 16 D	Male	Mixed Breed	Bangkok	<10	<10
1749	Dog	2021-03-17	13 Y 3 M 3 D	Female	Golden Retriever	Nonthaburi	<10	<10
1750	Dog	2021-03-17	16 Y 3 M 16 D	Male	Poodle	Bangkok	<10	<10
1751	Dog	2021-03-17	3 Y 0 M 16 D	Male	Mixed Breed	Bangkok	<10	<10
1752	Dog	2021-03-17	13 Y 1 M 16 D	Male	Mixed Breed	Bangkok	<10	<10
1753	Dog	2021-03-17	11 Y 0 M 19 D	Female	Thai	Nakhon Pathom	<10	<10
1754	Dog	2021-03-17	7 Y 0 M 16 D	Male	Beagle	Nakhon Pathom	<10	<10
1755	Cat	2021-03-17	5 Y 1 M 16 D	Male	Siamese	Bangkok	<10	<10
1756	Cat	2021-03-17	0 Y 11 M 16 D	Male	Scottish Fold Mix	Nakhon Pathom	<10	<10
1757	Cat	2021-03-17	1 Y 6 M 15 D	Male	Persian Mix	Nonthaburi	<10	<10
1758	Cat	2021-03-17	7 Y 5 M 16 D	Male	Siamese	Bangkok	<10	<10
1759	Cat	2021-03-17	6 Y 1 M 16 D	Male	Thai	Nakhon Pathom	<10	<10
1760	Cat	2021-03-17	5 Y 7 M 16 D	Male	Thai	Bangkok	<10	<10
1761	Cat	2021-03-17	6 Y 0 M 16 D	Male	Persian	Nakhon Pathom	<10	<10
1762	Cat	2021-03-17	0 Y 3 M 25 D	Male	Thai	Nakhon Pathom	<10	<10
1763	Cat	2021-03-17	11 Y 5 M 16 D	Female	Thai	Bangkok	<10	<10
1764	Cat	2021-03-17	0 Y 4 M 16 D	Male	Thai	Bangkok	<10	<10
1765	Cat	2021-03-17	0 Y 4 M 16 D	Female	Thai	Nonthaburi	<10	<10
1766	Dog	2021-03-19	10 Y 0 M 18 D	Female	Golden Retriever	Nonthaburi	<10	<10
1767	Dog	2021-03-19	7 Y 0 M 18 D	Male	Yorkshire Terrier	Bangkok	<10	<10
1768	Dog	2021-03-19	12 Y 0 M 18 D	Female	Mixed Breed	Bangkok	<10	<10
1769	Dog	2021-03-19	21 Y 0 M 18 D	Female	Poodle	Bangkok	<10	<10
1770	Dog	2021-03-19	2 Y 6 M 18 D	Male	Thai Bangkaew	Nakhon Pathom	<10	<10
1771	Dog	2021-03-19	1 Y 0 M 18 D	Female	Thai	Nakhon Pathom	<10	<10
1772	Dog	2021-03-19	11 Y 0 M 21 D	Female	Thai	Nakhon Pathom	<10	<10
1773	Dog	2021-03-19	0 Y 3 M 5 D	Male	Border Collie	Bangkok	<10	<10
1774	Dog	2021-03-19	9 Y 4 M 11 D	Female	Beagle	Bangkok	<10	<10
1775	Dog	2021-03-19	8 Y 0 M 18 D	Male	Siberian Husky	Bangkok	<10	<10
1776	Dog	2021-03-19	11 Y 5 M 9 D	Female	Thai Bangkaew	Bangkok	<10	<10
1777	Dog	2021-03-19	12 Y 2 M 18 D	Male	Beagle	Bangkok	<10	<10
1778	Dog	2021-03-19	12 Y 0 M 18 D	Male	Thai Ridgeback	Nonthaburi	<10	<10
1779	Cat	2021-03-19	10 Y 0 M 18 D	Male	Thai	Bangkok	<10	<10
1780	Cat	2021-03-19	11 Y 1 M 18 D	Female	Persian	Nakhon Pathom	<10	<10
1781	Cat	2021-03-19	2 Y 0 M 18 D	Male	Thai	Nonthaburi	<10	<10
1782	Cat	2021-03-19	0 Y 8 M 4 D	Male	Mixed Breed	Nakhon Pathom	<10	<10
1783	Cat	2021-03-19	9 Y 0 M 18 D	Male	Siamese	Bangkok	<10	<10
1784	Cat	2021-03-19	5 Y 0 M 18 D	Female	Thai	Bangkok	<10	<10
1785	Cat	2021-03-19	5 Y 11 M 24 D	Male	Siamese	Bangkok	<10	<10
1786	Dog	2021-03-22	4 Y 1 M 21 D	Male	Pomeranian	Bangkok	<10	<10
1787	Dog	2021-03-22	6 Y 2 M 21 D	Male	Thai	Nakhon Pathom	<10	<10
1788	Dog	2021-03-22	10 Y 0 M 21 D	Male	Thai	Nonthaburi	<10	<10
1789	Dog	2021-03-22	11 Y 0 M 24 D	Female	Thai	Nakhon Pathom	<10	<10
1790	Dog	2021-03-22	0 Y 1 M 4 D	Male	Thai	Bangkok	<10	<10
1791	Dog	2021-03-22	10 Y 0 M 21 D	Male	Thai	Bangkok	<10	<10
1792	Dog	2021-03-22	0 Y 4 M 21 D	Female	Thai	Nakhon Pathom	<10	<10
1793	Dog	2021-03-22	12 Y 0 M 21 D	Male	Shih Tzu	Nonthaburi	<10	<10
1794	Dog	2021-03-22	0 Y 10 M 21 D	Male	Thai	Bangkok	<10	<10
1795	Dog	2021-03-22	15 Y 2 M 21 D	Female	Thai	Bangkok	<10	<10
1796	Cat	2021-03-22	1 Y 6 M 21 D	Male	Thai	Bangkok	<10	<10
1797	Cat	2021-03-22	10 Y 3 M 21 D	Female	Thai	Bangkok	<10	<10
1798	Cat	2021-03-22	6 Y 0 M 21 D	Male	Siamese	Bangkok	<10	<10
1799	Cat	2021-03-22	0 Y 0 M 4 D	Male	Thai	Bangkok	<10	<10
1800	Cat	2021-03-22	6 Y 10 M 21 D	Male	Siamese	Bangkok	<10	<10
1801	Cat	2021-03-22	10 Y 0 M 21 D	Female	Khao Manee	Bangkok	<10	<10
1802	Cat	2021-03-22	7 Y 0 M 21 D	Female	Mixed Breed	Bangkok	<10	<10
1803	Cat	2021-03-22	10 Y 0 M 21 D	Female	Thai	Bangkok	<10	<10
1804	Cat	2021-03-22	0 Y 4 M 21 D	Female	Thai	Nonthaburi	<10	<10
1805	Dog	2021-03-24	13 Y 6 M 21 D	Male	Poodle	Samut Songkhram	<10	<10
1806	Dog	2021-03-24	3 Y 7 M 23 D	Male	Thai	Samut Prakan	<10	<10
1807	Dog	2021-03-24	8 Y 3 M 16 D	Male	Beagle Mix	Bangkok	<10	<10
1808	Dog	2021-03-24	10 Y 0 M 23 D	Male	Mixed Breed	Bangkok	<10	<10
1809	Dog	2021-03-24	2 Y 3 M 23 D	Male	Mixed Breed	Bangkok	<10	<10
1810	Dog	2021-03-24	10 Y 2 M 23 D	Male	Pomeranian	Nakhon Pathom	<10	<10
1811	Dog	2021-03-24	10 Y 1 M 23 D	Female	Golden Retriever Mix	Nonthaburi	<10	<10
1812	Dog	2021-03-24	6 Y 9 M 13 D	Female	Siberian Husky	Bangkok	<10	<10
1813	Dog	2021-03-24	9 Y 1 M 23 D	Male	Thai	Nonthaburi	<10	<10
1814	Dog	2021-03-24	1 Y 9 M 23 D	Male	Chihuahua	Nakhon Pathom	<10	<10
1815	Cat	2021-03-24	0 Y 2 M 17 D	Female	Thai	Nonthaburi	<10	<10
1816	Cat	2021-03-24	0 Y 4 M 22 D	Female	Thai	Samut Sakhon	<10	<10
1817	Cat	2021-03-24	10 Y 3 M 23 D	Male	Persian	Bangkok	<10	<10
1818	Cat	2021-03-24	16 Y 10 M 21 D	Male	Blue Point Siamese	Bangkok	<10	<10
1819	Cat	2021-03-24	0 Y 0 M 6 D	Male	Thai	Bangkok	<10	<10
1820	Cat	2021-03-24	16 Y 10 M 22 D	Female	Thai	Bangkok	<10	<10
1821	Cat	2021-03-24	10 Y 0 M 23 D	Female	Khao Manee	Bangkok	<10	<10
1822	Cat	2021-03-24	5 Y 0 M 23 D	Female	Thai	Nonthaburi	<10	<10
1823	Cat	2021-03-24	6 Y 5 M 9 D	Male	Thai	Bangkok	<10	<10
1824	Cat	2021-03-24	5 Y 1 M 23 D	Male	Siamese	Bangkok	<10	<10
1825	Dog	2021-03-26	12 Y 11 M 25 D	Female	Poodle	Bangkok	<10	<10
1826	Dog	2021-03-26	7 Y 9 M 25 D	Female	Chihuahua	Samut Sakhon	<10	<10
1827	Dog	2021-03-26	12 Y 2 M 25 D	Female	Poodle	Samut Sakhon	<10	<10
1828	Dog	2021-03-26	0 Y 0 M 11 D	Male	Golden Retriever Mix	Pathum Thani	<10	<10
1829	Dog	2021-03-26	4 Y 9 M 8 D	Male	Mixed Breed	Nonthaburi	<10	<10
1830	Dog	2021-03-26	6 Y 2 M 23 D	Female	Shih Tzu	Bangkok	<10	<10
1831	Dog	2021-03-26	0 Y 8 M 25 D	Female	Thai	Bangkok	<10	<10
1832	Dog	2021-03-26	11 Y 1 M 0 D	Female	Thai	Nakhon Pathom	<10	<10
1833	Dog	2021-03-26	13 Y 0 M 25 D	Female	Pomeranian	Nonthaburi	<10	<10
1834	Dog	2021-03-26	14 Y 9 M 25 D	Female	Terrier	Nonthaburi	<10	<10
1835	Dog	2021-03-26	7 Y 4 M 25 D	Male	Poodle	Nonthaburi	<10	<10
1836	Dog	2021-03-26	4 Y 3 M 25 D	Male	Thai	Nakhon Pathom	<10	<10
1837	Dog	2021-03-26	8 Y 0 M 25 D	Male	Poodle	Bangkok	<10	<10
1838	Dog	2021-03-26	0 Y 5 M 25 D	Female	Thai	Bangkok	<10	<10
1839	Cat	2021-03-26	3 Y 5 M 16 D	Male	Domestic Shorthair (DSH)	Bangkok	<10	<10
1840	Cat	2021-03-26	0 Y 0 M 4 D	Female	Thai	Nakhon Pathom	<10	<10
1841	Cat	2021-03-26	0 Y 6 M 25 D	Female	Thai	Nakhon Pathom	<10	<10
1842	Dog	2021-03-26	12 Y 3 M 9 D	Male	Chihuahua	Bangkok	<10	<10
1843	Dog	2021-03-26	12 Y 1 M 25 D	Male	Poodle	Nakhon Pathom	<10	<10
1844	Dog	2021-03-26	4 Y 0 M 25 D	Female	Mixed Breed	Bangkok	<10	<10
1845	Cat	2021-03-31	5 Y 2 M 30 D	Female	Siamese	Bangkok	<10	<10
1846	Cat	2021-03-31	7 Y 0 M 30 D	Male	Persian	Nakhon Pathom	<10	<10
1847	Cat	2021-03-31	8 Y 0 M 30 D	Male	Thai	Bangkok	<10	<10
1848	Cat	2021-03-31	10 Y 3 M 30 D	Female	Thai	Bangkok	<10	<10
1849	Cat	2021-03-31	0 Y 4 M 21 D	Male	Persian Mix	Nakhon Pathom	<10	<10
1850	Cat	2021-03-31	0 Y 6 M 30 D	Female	Thai	Bangkok	<10	<10
1851	Cat	2021-03-31	8 Y 0 M 30 D	Male	Thai	Samut Sakhon	<10	<10
1852	Cat	2021-03-31	0 Y 2 M 30 D	Female	Siamese	Bangkok	<10	<10
1853	Dog	2021-03-31	6 Y 0 M 30 D	Male	Rottweiler	Nonthaburi	<10	<10
1854	Dog	2021-03-31	0 Y 10 M 30 D	Male	Thai	Bangkok	<10	<10
1855	Dog	2021-03-31	13 Y 0 M 30 D	Male	Thai Ridgeback	Bangkok	<10	<10
1856	Dog	2021-03-31	14 Y 4 M 30 D	Female	Shih Tzu	Nonthaburi	<10	<10
1857	Dog	2021-03-31	10 Y 1 M 30 D	Male	Shih Tzu	Nonthaburi	<10	<10
1858	Dog	2021-03-31	12 Y 0 M 30 D	Male	Golden Retriever	Bangkok	<10	<10
1859	Dog	2021-03-31	11 Y 0 M 30 D	Male	Poodle Mix	Nonthaburi	<10	<10
1860	Dog	2021-03-31	12 Y 2 M 30 D	Female	Thai	Bangkok	<10	<10
1861	Dog	2021-03-31	3 Y 9 M 11 D	Male	Mixed Breed	Bangkok	<10	<10
1862	Dog	2021-03-31	8 Y 0 M 6 D	Male	Thai	Bangkok	<10	<10
1863	Dog	2021-03-31	4 Y 1 M 30 D	Female	Poodle Mix	Pathum Thani	<10	<10
1864	Dog	2021-03-31	4 Y 4 M 30 D	Female	Chihuahua	Bangkok	<10	<10
1865	Dog	2021-04-02	12 Y 2 M 1 D	Female	Thai	Bangkok	<10	<10
1866	Dog	2021-04-02	4 Y 5 M 1 D	Female	Chihuahua	Bangkok	<10	<10
1867	Dog	2021-04-02	5 Y 5 M 1 D	Female	Pug	Samut Sakhon	<10	<10
1868	Dog	2021-04-02	11 Y 7 M 4 D	Female	German Shepherd	Bangkok	<10	<10
1869	Dog	2021-04-02	17 Y 11 M 1 D	Female	Shih Tzu	Samut Sakhon	<10	<10
1870	Dog	2021-04-02	2 Y 11 M 3 D	Male	Siberian Husky	Bangkok	<10	<10
1871	Dog	2021-04-02	7 Y 7 M 1 D	Male	Mixed Breed	Nonthaburi	<10	<10
1872	Dog	2021-04-02	0 Y 4 M 1 D	Male	Thai Bangkaew	Nakhon Pathom	<10	<10
1873	Dog	2021-04-02	2 Y 2 M 1 D	Female	Chihuahua	Bangkok	<10	<10
1874	Dog	2021-04-02	4 Y 1 M 1 D	Male	Chihuahua	Nakhon Pathom	<10	<10
1875	Dog	2021-04-02	11 Y 11 M 9 D	Female	Shih Tzu	Bangkok	<10	<10
1876	Dog	2021-04-02	8 Y 6 M 19 D	Male	Labrador Retriever	Bangkok	<10	<10
1877	Cat	2021-04-02	10 Y 3 M 0 D	Female	Thai	Bangkok	<10	<10
1878	Cat	2021-04-02	2 Y 1 M 1 D	Female	Thai	Bangkok	<10	<10
1879	Cat	2021-04-02	0 Y 8 M 10 D	Female	Thai	Nonthaburi	<10	<10
1880	Cat	2021-04-02	0 Y 3 M 1 D	Female	Siamese	Bangkok	<10	<10
1881	Cat	2021-04-02	1 Y 10 M 1 D	Female	Mixed Breed	Bangkok	<10	<10
1882	Cat	2021-04-02	0 Y 5 M 3 D	Male	Thai	Bangkok	<10	<10
1883	Cat	2021-04-02	0 Y 2 M 26 D	Female	Thai	Nonthaburi	<10	<10
1884	Cat	2021-04-02	3 Y 8 M 13 D	Female	Thai	Nakhon Pathom	<10	<10
1885	Dog	2021-04-05	0 Y 11 M 4 D	Male	Thai	Bangkok	<10	<10
1886	Dog	2021-04-05	6 Y 4 M 12 D	Male	Labrador Retriever	Bangkok	<10	<10
1887	Dog	2021-04-05	7 Y 10 M 11 D	Female	Pomeranian	Nakhon Pathom	<10	<10
1888	Dog	2021-04-05	14 Y 0 M 4 D	Male	Thai Mix	Bangkok	<10	<10
1889	Dog	2021-04-05	6 Y 0 M 4 D	Male	Thai	Bangkok	<10	<10
1890	Dog	2021-04-05	8 Y 9 M 4 D	Female	Beagle	Bangkok	<10	<10
1891	Dog	2021-04-05	12 Y 4 M 4 D	Female	Poodle	Nakhon Pathom	<10	<10
1892	Dog	2021-04-05	15 Y 3 M 4 D	Female	Thai	Bangkok	<10	<10
1893	Dog	2021-04-05	14 Y 1 M 13 D	Male	Mixed Breed	Bangkok	<10	<10
1894	Dog	2021-04-05	11 Y 11 M 4 D	Female	Mixed Breed	Bangkok	<10	<10
1895	Dog	2021-04-05	0 Y 3 M 16 D	Female	Mixed Breed	Nakhon Pathom	<10	<10
1896	Dog	2021-04-05	15 Y 1 M 4 D	Male	Mixed Breed	Nonthaburi	<10	<10
1897	Dog	2021-04-05	12 Y 7 M 4 D	Male	Chihuahua	Bangkok	<10	<10
1898	Cat	2021-04-05	5 Y 1 M 4 D	Female	Thai	Bangkok	<10	<10
1899	Cat	2021-04-05	0 Y 8 M 14 D	Male	Scottish Fold	Bangkok	<10	<10
1900	Cat	2021-04-05	10 Y 10 M 4 D	Female	Thai	Bangkok	<10	<10
1901	Cat	2021-04-05	6 Y 6 M 4 D	Female	Siamese	Nonthaburi	<10	<10
1902	Cat	2021-04-05	2 Y 2 M 4 D	Male	Thai	Bangkok	<10	<10
1903	Cat	2021-04-05	2 Y 2 M 4 D	Female	Thai	Nonthaburi	<10	<10
1904	Dog	2021-04-07	0 Y 11 M 6 D	Male	Pug	Nonthaburi	<10	<10
1905	Dog	2021-04-07	12 Y 1 M 6 D	Female	Thai Ridgeback	Nonthaburi	<10	<10
1906	Dog	2021-04-07	8 Y 4 M 6 D	Male	Thai Mix	Bangkok	<10	<10
1907	Dog	2021-04-07	6 Y 7 M 6 D	Male	American Cocker Spaniel	Bangkok	<10	<10
1908	Dog	2021-04-07	10 Y 2 M 23 D	Female	Spitz	Nonthaburi	<10	<10
1909	Dog	2021-04-07	8 Y 8 M 6 D	Female	Thai	Bangkok	<10	<10
1910	Dog	2021-04-07	12 Y 0 M 6 D	Male	Jack Russell Terrier	Bangkok	<10	<10
1911	Dog	2021-04-07	9 Y 0 M 6 D	Male	Thai Bangkaew	Bangkok	<10	<10
1912	Dog	2021-04-07	4 Y 0 M 7 D	Male	French Bulldog	Nakhon Pathom	<10	<10
1913	Dog	2021-04-07	12 Y 6 M 6 D	Male	Shih Tzu	Bangkok	<10	<10
1914	Dog	2021-04-07	15 Y 2 M 6 D	Male	Mixed Breed	Nonthaburi	<10	<10
1915	Dog	2021-04-07	8 Y 10 M 6 D	Male	Thai	Samut Sakhon	<10	<10
1916	Dog	2021-04-07	3 Y 0 M 6 D	Male	Pomeranian	Bangkok	<10	<10
1917	Dog	2021-04-07	1 Y 0 M 6 D	Male	American Pit Bull Terrier Mix	Nonthaburi	<10	<10
1918	Cat	2021-04-07	5 Y 8 M 6 D	Male	Thai	Bangkok	<10	<10
1919	Cat	2021-04-07	3 Y 1 M 6 D	Male	Persian Mix	Nonthaburi	<10	<10
1920	Cat	2021-04-07	9 Y 4 M 6 D	Female	Siamese	Nonthaburi	<10	<10
1921	Cat	2021-04-07	0 Y 2 M 8 D	Male	Thai	Bangkok	<10	<10
1922	Cat	2021-04-07	2 Y 2 M 6 D	Male	Thai	Bangkok	<10	<10
1923	Cat	2021-04-07	4 Y 4 M 6 D	Male	Siamese	Bangkok	<10	<10
1924	Dog	2021-04-09	13 Y 2 M 8 D	Female	Chihuahua	Bangkok	<10	<10
1925	Dog	2021-04-09	0 Y 4 M 8 D	Male	Thai Bangkaew	Nakhon Pathom	<10	<10
1926	Dog	2021-04-09	0 Y 0 M 4 D	Female	Labrador Retriever	Nakhon Pathom	<10	<10
1927	Dog	2021-04-09	13 Y 10 M 8 D	Male	Shih Tzu	Bangkok	<10	<10
1928	Dog	2021-04-09	0 Y 3 M 20 D	Female	Mixed Breed	Nakhon Pathom	<10	<10
1929	Dog	2021-04-09	4 Y 6 M 26 D	Male	West Highland White Terrier	Bangkok	<10	<10
1930	Dog	2021-04-09	1 Y 3 M 8 D	Female	Thai	Bangkok	<10	<10
1931	Dog	2021-04-09	10 Y 7 M 8 D	Female	Shih Tzu	Bangkok	<10	<10
1932	Dog	2021-04-09	14 Y 0 M 1 D	Female	Pug	Nonthaburi	<10	<10
1933	Dog	2021-04-09	10 Y 1 M 8 D	Male	Siberian Husky	Bangkok	<10	<10
1934	Dog	2021-04-09	14 Y 0 M 8 D	Male	Pomeranian	Samut Sakhon	<10	<10
1935	Cat	2021-04-09	8 Y 4 M 8 D	Female	Thai	Bangkok	<10	<10
1936	Cat	2021-04-09	10 Y 0 M 8 D	Female	Thai	Bangkok	<10	<10
1937	Cat	2021-04-09	8 Y 6 M 8 D	Female	Thai	Bangkok	<10	<10
1938	Cat	2021-04-09	18 Y 0 M 8 D	Female	Thai	Bangkok	<10	<10
1939	Cat	2021-04-09	10 Y 11 M 22 D	Female	Siamese	Bangkok	<10	<10
1940	Dog	2021-04-09	7 Y 1 M 8 D	Male	Thai	Nakhon Pathom	<10	<10
1941	Cat	2021-04-09	8 Y 1 M 8 D	Male	Thai	Nonthaburi	<10	<10
1942	Cat	2021-04-09	3 Y 8 M 20 D	Female	Thai	Nakhon Pathom	<10	<10
1943	Cat	2021-04-09	0 Y 9 M 8 D	Female	Thai	Bangkok	<10	<10
1944	Dog	2021-04-19	12 Y 10 M 18 D	Female	Mixed Breed	Nonthaburi	<10	<10
1945	Dog	2021-04-19	2 Y 2 M 5 D	Male	Chow Chow	Bangkok	<10	<10
1946	Dog	2021-04-19	9 Y 10 M 18 D	Female	Thai	Nonthaburi	<10	<10
1947	Dog	2021-04-19	2 Y 0 M 18 D	Male	Thai	Nakhon Pathom	<10	<10
1948	Dog	2021-04-19	12 Y 3 M 18 D	Male	Mixed Breed	Bangkok	<10	<10
1949	Dog	2021-04-19	10 Y 11 M 18 D	Male	Thai	Bangkok	<10	<10
1950	Dog	2021-04-19	12 Y 4 M 2 D	Male	Chihuahua	Bangkok	<10	<10
1951	Dog	2021-04-19	11 Y 7 M 18 D	Female	Shih Tzu Mix	Ratchaburi	<10	<10
1952	Dog	2021-04-19	4 Y 7 M 5 D	Male	West Highland White Terrier	Bangkok	<10	<10
1953	Dog	2021-04-19	0 Y 0 M 14 D	Female	Labrador Retriever	Nakhon Pathom	<10	<10
1954	Dog	2021-04-19	0 Y 0 M 14 D	Female	Labrador Retriever	Nakhon Pathom	<10	<10
1955	Cat	2021-04-19	0 Y 0 M 8 D	Female	Thai	Bangkok	<10	<10
1956	Cat	2021-04-19	7 Y 0 M 18 D	Female	Thai	Nakhon Pathom	<10	<10
1957	Cat	2021-04-19	1 Y 7 M 18 D	Female	Thai	Nonthaburi	<10	<10
1958	Cat	2021-04-19	0 Y 8 M 4 D	Male	Thai	Bangkok	<10	<10
1959	Cat	2021-04-19	1 Y 2 M 18 D	Male	Maine Coon	Nonthaburi	<10	<10
1960	Cat	2021-04-19	13 Y 2 M 18 D	Female	Thai	Samut Sakhon	<10	<10
1961	Cat	2021-04-19	7 Y 0 M 18 D	Male	Domestic Shorthair (DSH)	Nakhon Pathom	<10	<10
1962	Cat	2021-04-19	1 Y 5 M 18 D	Female	Thai	Bangkok	<10	<10
1963	Cat	2021-04-19	0 Y 0 M 21 D	Male	Thai	Nakhon Pathom	<10	<10
1964	Cat	2021-04-20	1 Y 0 M 19 D	Male	Thai	Nakhon Pathom	<10	<10
1965	Cat	2021-04-20	4 Y 4 M 19 D	Male	Siamese	Bangkok	<10	<10
1966	Cat	2021-04-20	9 Y 6 M 19 D	Female	Persian	Samut Sakhon	<10	<10
1967	Cat	2021-04-20	1 Y 4 M 10 D	Female	Thai	Bangkok	<10	<10
1968	Dog	2021-04-20	2 Y 0 M 19 D	Male	Mixed Breed	Kanchanaburi	<10	<10
1969	Dog	2021-04-20	0 Y 4 M 19 D	Male	Thai Bangkaew	Nakhon Pathom	<10	<10
1970	Dog	2021-04-20	12 Y 0 M 19 D	Female	Shih Tzu	Bangkok	<10	<10
1971	Dog	2021-04-20	0 Y 3 M 12 D	Male	Thai	Nakhon Pathom	<10	<10
1972	Dog	2021-04-20	1 Y 10 M 4 D	Female	Thai	Nonthaburi	<10	<10
1973	Dog	2021-04-20	8 Y 9 M 4 D	Male	Mixed Breed	Nakhon Pathom	<10	<10
1974	Dog	2021-04-20	6 Y 3 M 19 D	Male	Thai	Bangkok	<10	<10
1975	Dog	2021-04-20	8 Y 0 M 19 D	Male	Pug	Nonthaburi	<10	<10
1976	Dog	2021-04-20	7 Y 6 M 19 D	Male	Rottweiler	Bangkok	<10	<10
1977	Dog	2021-04-20	12 Y 3 M 26 D	Female	Golden Retriever	Nonthaburi	<10	<10
1978	Dog	2021-04-20	8 Y 8 M 24 D	Male	Chihuahua	Nonthaburi	<10	<10
1979	Dog	2021-04-20	12 Y 2 M 19 D	Female	Mixed Breed	Bangkok	<10	<10
1980	Dog	2021-04-20	9 Y 1 M 10 D	Male	Shih Tzu	Samut Prakan	<10	<10
1981	Dog	2021-04-20	16 Y 0 M 19 D	Male	Mixed Breed	Nakhon Pathom	<10	<10
1982	Dog	2021-04-20	7 Y 9 M 18 D	Male	Chihuahua	Bangkok	<10	<10
1983	Dog	2021-04-20	5 Y 5 M 19 D	Male	Thai Bangkaew Mix	Bangkok	<10	<10
1984	Dog	2021-04-22	11 Y 11 M 7 D	Female	Pomeranian	Bangkok	<10	<10
1985	Dog	2021-04-22	4 Y 1 M 21 D	Female	Mixed Breed	Bangkok	<10	<10
1986	Dog	2021-04-22	7 Y 6 M 21 D	Male	Rottweiler	Bangkok	<10	<10
1987	Dog	2021-04-22	6 Y 0 M 21 D	Female	Thai Ridgeback	Nonthaburi	<10	<10
1988	Dog	2021-04-22	6 Y 8 M 21 D	Male	Chinchilla	Nonthaburi	<10	<10
1989	Dog	2021-04-22	0 Y 6 M 11 D	Male	Thai	Nakhon Pathom	<10	<10
1990	Dog	2021-04-22	1 Y 3 M 18 D	Male	Thai	Bangkok	<10	<10
1991	Dog	2021-04-22	10 Y 0 M 21 D	Male	Mixed Breed	Bangkok	<10	<10
1992	Dog	2021-04-22	16 Y 2 M 21 D	Female	Terrier Mix	Nakhon Pathom	<10	<10
1993	Dog	2021-04-22	11 Y 0 M 21 D	Female	Pomeranian	Bangkok	<10	<10
1994	Dog	2021-04-22	14 Y 0 M 21 D	Female	Pomeranian Mix	Bangkok	<10	<10
1995	Cat	2021-04-22	1 Y 1 M 6 D	Female	Scottish Fold	Samut Sakhon	<10	<10
1996	Cat	2021-04-22	2 Y 9 M 17 D	Female	Scottish Fold	Bangkok	<10	<10
1997	Cat	2021-04-22	1 Y 0 M 21 D	Male	Thai	Nakhon Pathom	<10	<10
[truncated: 1,102 more rows]
